# Supplementary material for: Palladium-catalyzed defluorinative alkynylation of polyfluoroalkyl ketones with alkynes for the synthesis of fluorinated fused furans
Source: Royal Society of Chemistry journal article supplement (doi:10.1039/d0qo01009j), 2020-11-26

## Supporting Information

### **Palladium-Catalyzed Defluorinative Alkynylation of Polyfluoroalkyl Ketones with Alkynes for the Synthesis of Fluorinated Fused Furans**

Xue-Qiang Chu,\* Man-Ling Zhi, Si-Xuan Zhang, Ya-Wen Wang, Weidong Rao, Haiyan Xu, and Zhi-Liang Shen\*

#### **Table of Contents**

|                                                                                                                                                       |          |
|-------------------------------------------------------------------------------------------------------------------------------------------------------|----------|
| 1. General information                                                                                                                                | page S2  |
| 2. General procedures for the synthesis of $\alpha$ -perfluoroalkyl ketones                                                                           | page S2  |
| 3. General procedures for the synthesis of naphtho[1,2- <i>b</i> ]furan derivatives                                                                   | page S5  |
| 4. General procedure for the reaction of $\alpha$ -perfluorobutyl tetralone ( <b>1a</b> ) with 1-(buta-1,3-diyne-1-yl)-4-methoxybenzene ( <b>2q</b> ) | page S5  |
| 5. General procedure for the reaction of $\alpha$ -perfluorobutyl tetralone ( <b>1a</b> ) with ( <i>E</i> )-but-1-en-3-yn-1-ylbenzene ( <b>2r</b> )   | page S5  |
| 6. Large-scale synthesis of product <b>3aa</b>                                                                                                        | page S6  |
| 7. Further applications for the synthesis of complex molecules                                                                                        | page S6  |
| 8. Optimization of reaction conditions                                                                                                                | page S8  |
| 9. Mechanistic studies                                                                                                                                | page S11 |
| 10. Characterization data for products                                                                                                                | page S18 |
| 11. References                                                                                                                                        | page S32 |
| 12. <sup>1</sup> H, <sup>19</sup> F, and <sup>13</sup> C NMR spectra of products                                                                      | page S33 |

## 1. General information

Unless otherwise stated, all reagents were purchased from commercial suppliers and used without further purification. All reactions were carried out under N<sub>2</sub> atmosphere using undistilled solvent. Melting points were recorded on an Electrothermal digital melting point apparatus. IR spectra were recorded on a FT-IR spectrophotometer using KBr optics. <sup>1</sup>H, <sup>19</sup>F, and <sup>13</sup>C NMR spectra were recorded in CDCl<sub>3</sub> on Bruker Avance or Joel 400 MHz spectrometers. The chemical shifts ( $\delta$ ) are reported in ppm and coupling constants ( $J$ ) in Hz. High resolution mass spectra (HRMS) were obtained using a commercial apparatus (ESI Source). Column chromatography was generally performed on silica gel (300-400 mesh) and reactions were monitored by thin layer chromatography (TLC) using UV light to visualize the course of the reactions.

## 2. General procedures for the synthesis of $\alpha$ -perfluoroalkyl ketones

Various  $\alpha$ -perfluoroalkyl ketones:

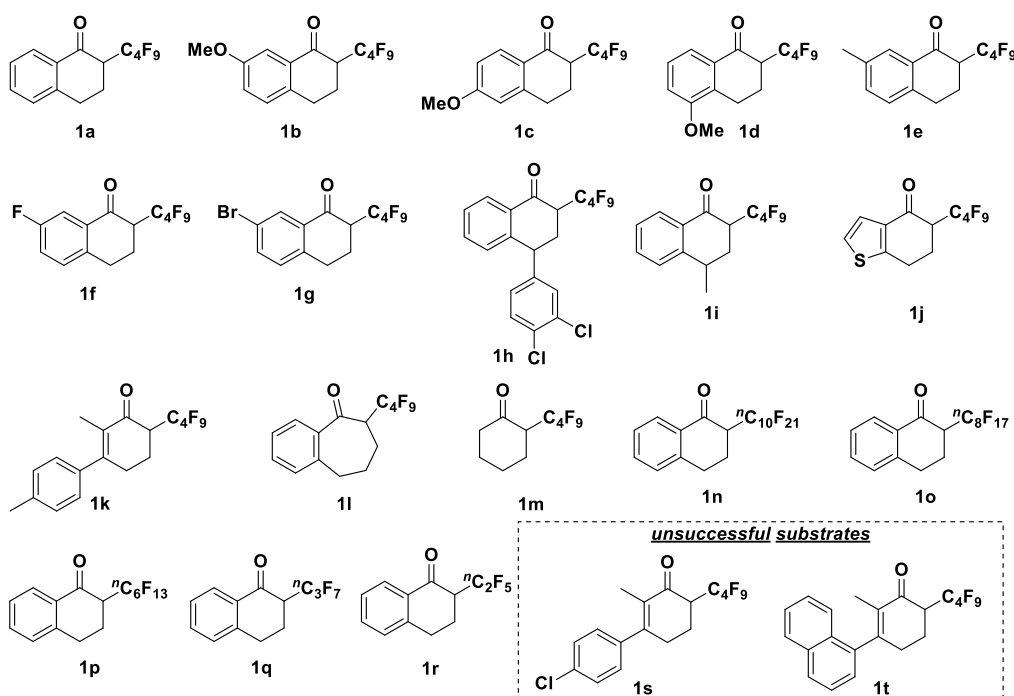

### General procedure A<sup>[1]</sup>

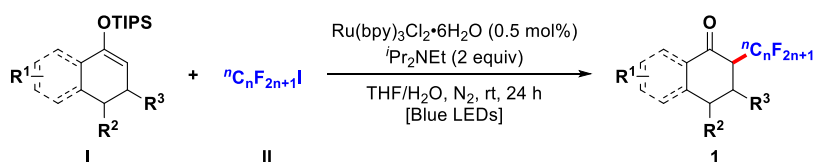

According to MacMillan's reported method, a solution of enilsilane **I** (1.2 mmol), Ru(bpy)<sub>3</sub>Cl<sub>2</sub>·6H<sub>2</sub>O (4.5 mg, 0.006 mmol, 0.5 mol%), *N*-ethyl-*N*-isopropylpropan-2-amine (424.0  $\mu$ L, 2.4 mmol), perfluoroalkyl iodide **II** (12 mmol), H<sub>2</sub>O (32.0  $\mu$ L, 17.8 mmol) in THF (6.0 mL) was stirred under nitrogen atmosphere (by 3 times' vacuum evacuation/N<sub>2</sub> backfill cycles) by irradiation with 8 W Blue LEDs at room temperature for 24 h. Upon completion of the reaction (indicated by TLC), solvent was removed under vacuum and the residue was purified by flash silica gel column chromatography (300-400 mesh) using petroleum ether/ethyl acetate (1:500) as eluent to afford the  $\alpha$ -perfluoroalkyl ketone **1**.

**Representative examples:**

**2-(Perfluorobutyl)-3,4-dihydronaphthalen-1(2H)-one (1a)<sup>[1]</sup>**

<sup>1</sup>H NMR (400 MHz, CDCl<sub>3</sub>):  $\delta$  = 8.08 – 8.01 (m, 1H), 7.57 – 7.49 (m, 1H), 7.35 (t,  $J$  = 7.6 Hz, 1H), 7.28 (s, 1H), 3.49 – 3.35 (m, 1H), 3.23 – 3.15 (m, 1H), 3.08 – 2.98 (m, 1H), 2.55 – 2.36 (m, 2H) ppm.

<sup>19</sup>F NMR (376 MHz, CDCl<sub>3</sub>):  $\delta$  = -80.45 – -81.25 (m, 3F), -108.96 – -113.38 (m, 2F), -118.78 – -121.94 (m, 2F), -125.80 – -126.50 (m, 2F) ppm.

<sup>13</sup>C NMR (100 MHz, CDCl<sub>3</sub>):  $\delta$  = 190.3 (m), 142.9, 134.2, 132.3 (m), 128.7, 127.9, 127.0, 49.3 (t,  $J$  = 20.3 Hz), 27.1, 22.9 (m) ppm; carbons corresponding to the C<sub>4</sub>F<sub>9</sub> group cannot be identified due to C-F coupling.

**2,4'-Dimethyl-4-(perfluorobutyl)-5,6-dihydro-[1,1'-biphenyl]-3(4H)-one (1k)**

<sup>1</sup>H NMR (400 MHz, CDCl<sub>3</sub>):  $\delta$  = 7.25 – 7.20 (m, 2H), 7.13 – 7.08 (m, 2H), 3.36 – 3.22 (m, 1H), 2.87 – 2.75 (m, 1H), 2.72 – 2.60 (m, 1H), 2.38 (s, 3H), 1.77 (t,  $J$  = 1.9 Hz, 3H) ppm.

<sup>19</sup>F NMR (376 MHz, CDCl<sub>3</sub>):  $\delta$  = -80.77 (t,  $J$  = 9.8 Hz, 3F), -109.70 – -114.25 (m, 2F), -119.29 – -122.06 (m, 2F), -125.98 (t,  $J$  = 15.4 Hz, 2F) ppm.

<sup>13</sup>C NMR (100 MHz, CDCl<sub>3</sub>):  $\delta$  = 191.7 (t,  $J$  = 1.4 Hz), 156.6, 138.4, 137.3, 132.1, 129.1, 127.0, 47.6 (t,  $J$  = 20.2 Hz), 30.7, 22.0 (m), 21.2, 13.3 ppm; carbons corresponding to the C<sub>4</sub>F<sub>9</sub> group cannot be identified due to C-F coupling.

**4'-Chloro-2-methyl-4-(perfluorobutyl)-5,6-dihydro-[1,1'-biphenyl]-3(4H)-one (1s)**

<sup>1</sup>H NMR (400 MHz, CDCl<sub>3</sub>):  $\delta$  = 7.34 (d,  $J$  = 8.4 Hz, 2H), 7.14 (d,  $J$  = 8.4 Hz, 2H), 3.35 – 3.20 (m, 1H), 2.83 – 2.71 (m, 1H), 2.70 – 2.58 (m, 1H), 2.46 – 2.29 (m, 2H), 1.79 (s, 3H) ppm.

<sup>19</sup>F NMR (376 MHz, CDCl<sub>3</sub>):  $\delta$  = -80.80 – -80.92 (m, 3F), -110.28 – -114.09 (m, 2F), -119.53 – -121.96 (m, 2F), -125.96 – -126.14 (m, 2F) ppm.

<sup>13</sup>C NMR (100 MHz, CDCl<sub>3</sub>):  $\delta$  = 191.2, 154.9, 138.6, 134.2, 132.4, 128.6, 128.4, 47.6 (t,  $J$  = 20.6 Hz), 30.4, 21.8, 12.9 ppm; carbons corresponding to the C<sub>4</sub>F<sub>9</sub> group cannot be identified due to C-F coupling.

**2-Methyl-3-(naphthalen-1-yl)-6-(perfluorobutyl)cyclohex-2-en-1-one (1t)**

<sup>1</sup>H NMR (400 MHz, CDCl<sub>3</sub>):  $\delta$  = 7.93 – 7.86 (m, 1H), 7.83 (d,  $J$  = 8.3 Hz, 1H), 7.69 – 7.56 (m, 1H), 7.54 – 7.46 (m, 3H), 7.24 – 7.18 (m, 1H), 3.55 – 3.31 (m, 1H), 2.96 – 2.78 (m, 1H), 2.78 – 2.58 (m, 1H), 2.50 (d,  $J$  = 5.4 Hz, 2H), 1.56 (s, 3H) ppm.

<sup>19</sup>F NMR (376 MHz, CDCl<sub>3</sub>):  $\delta$  = -80.80 (s, 3F), -109.50 – -113.97 (m, 2F), -119.36 – -122.12 (m, 2F), -125.92 (t,  $J$  = 12.4 Hz, 2F) ppm.

<sup>13</sup>C NMR (100 MHz, CDCl<sub>3</sub>):  $\delta$  = 191.3 (m), 156.2 (d,  $J$  = 18.6 Hz), 138.1 (d,  $J$  = 5.1 Hz), 134.2 (d,  $J$  = 9.4 Hz), 133.6, 129.1 (d,  $J$  = 9.3 Hz), 128.7 (d,  $J$  = 9.2 Hz), 128.2 (d,  $J$  = 7.5 Hz), 126.8 (d,  $J$  = 16.2 Hz), 126.2 (d,  $J$  = 5.1 Hz), 125.4 (d,  $J$  = 11.6 Hz), 124.3 (d,  $J$  = 4.8 Hz), 123.6 (d,  $J$  = 3.6 Hz), 47.7 (q,  $J$  = 20.0 Hz), 31.1 (d,  $J$  = 23.2 Hz), 22.3 (m), 12.9 ppm; carbons corresponding to the C<sub>4</sub>F<sub>9</sub> group cannot be identified due to C-F coupling.

5-(Perfluorobutyl)-6,7-dihydrobenzo[*b*]thiophen-4(5H)-one (**1j**), 2-(perfluorodecyl)-3,4-dihydronaphthalen-1(2H)-one (**1n**), 2-(perfluorooctyl)-3,4-dihydronaphthalen-1(2H)-one (**1o**), 2-(perfluorohexyl)-3,4-dihydronaphthalen-1(2H)-one (**1p**), and 2-(perfluoroethyl)-3,4-dihydronaphthalen-1(2H)-one (**1r**) were synthesized according to general procedure A.

## General procedure B<sup>[2]</sup>

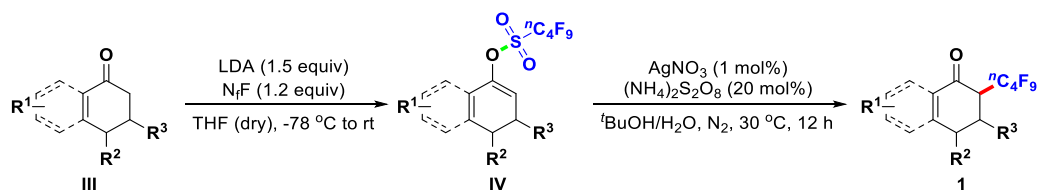

**Step 1:** The solution of ketone **III** (5 mmol) in dry THF (25 mL) was cooled to  $-78\text{ }^{\circ}\text{C}$  and then lithium diisopropylamide (LDA, 3.75 mL, 7.5 mmol, 2.0 mol/L in THF/hexane) was dropwise added to the reaction mixture. Nonfluorobutanesulfonyl fluoride (1.1 mL, 6 mmol) was added slowly by a syringe over 10 min. The reaction mixture was warmed to room temperature and stirred overnight. The reaction was then quenched by saturated  $\text{NH}_4\text{Cl}$  solution (20 mL) and extracted with EtOAc (20 mL x 3). The organic layer was washed with saturated brine twice, dried over  $\text{MgSO}_4$ , filtered, and concentrated under reduced pressure. The crude product was purified by flash column chromatography (300-400 mesh) on  $\text{Et}_3\text{N}$ -treated silica gel eluting with petroleum ether to afford enol nonaflate **IV**.

**Step 2:** A solution of enol nonaflate **IV** (0.8 mmol),  $(\text{NH}_4)_2\text{S}_2\text{O}_8$  (0.16 mmol, 37 mg), and  $\text{AgNO}_3$  (0.008 mmol, 1.4 mg) in  $t\text{BuOH}$  (2.0 mL) and  $\text{H}_2\text{O}$  (2.0 mL) was stirred vigorously under nitrogen atmosphere (by 3 times' vacuum evacuation/ $\text{N}_2$  backfill cycles) at  $30\text{ }^{\circ}\text{C}$  for 12 h. Upon completion of the reaction (indicated by TLC), the reaction mixture was extracted with dichloromethane. The organic layer was separated and the aqueous layer was washed with dichloromethane ( $3 \times 10$  mL). The combined organic layers were dried over  $\text{Na}_2\text{SO}_4$ . The solvent was removed under vacuum and the residue was purified by flash silica gel column chromatography (300-400 mesh) using petroleum ether/ethyl acetate as eluent to afford  $\alpha$ -perfluoroalkyl ketone **1**.

### Representative examples:

#### 7-Methoxy-2-(perfluorobutyl)-3,4-dihydronaphthalen-1(2H)-one (**1b**)

**$^1\text{H}$  NMR** (400 MHz,  $\text{CDCl}_3$ ):  $\delta$  = 8.02 (d,  $J$  = 8.8 Hz, 1H), 6.86 (dd,  $J$  = 8.8, 2.5 Hz, 1H), 6.70 (d,  $J$  = 2.4 Hz, 1H), 3.87 (s, 3H), 3.44 – 3.30 (m, 1H), 3.20 – 3.10 (m, 1H), 3.00 – 2.91 (m, 1H), 2.50 – 2.34 (m, 2H) ppm.

**$^{19}\text{F}$  NMR** (376 MHz,  $\text{CDCl}_3$ ):  $\delta$  = -80.45 – -81.24 (m, 3F), -108.98 – -113.48 (m, 2F), -118.81 – -121.88 (m, 2F), -125.99 – -126.55 (m, 2F) ppm.

**$^{13}\text{C}$  NMR** (100 MHz,  $\text{CDCl}_3$ ):  $\delta$  = 188.8 (m), 164.1, 145.5, 130.3, 125.8, 113.7, 112.3, 55.4, 48.9 (t,  $J$  = 20.4 Hz), 27.3, 23.0 ppm; carbons corresponding to the  $\text{C}_4\text{F}_9$  group cannot be identified due to C-F coupling.

6-Methoxy-2-(perfluorobutyl)-3,4-dihydronaphthalen-1(2H)-one (**1c**), 5-methoxy-2-(perfluorobutyl)-3,4-dihydronaphthalen-1(2H)-one (**1d**), 7-methyl-2-(perfluorobutyl)-3,4-dihydronaphthalen-1(2H)-one (**1e**), 7-fluoro-2-(perfluorobutyl)-3,4-dihydronaphthalen-1(2H)-one (**1f**), 7-bromo-2-(perfluorobutyl)-3,4-dihydronaphthalen-1(2H)-one (**1g**), 4-(3,4-dichlorophenyl)-2-(perfluorobutyl)-3,4-dihydronaphthalen-1(2H)-one (**1h**), 4-methyl-2-(perfluorobutyl)-3,4-dihydronaphthalen-1(2H)-one (**1i**), 6-(perfluorobutyl)-6,7,8,9-tetrahydro-5H-benzo[7]annulen-5-one (**1j**), 2-(perfluorobutyl)cyclohexan-1-one (**1m**), and 2-(perfluoropropyl)-3,4-dihydronaphthalen-1(2H)-one (**1r**) were synthesized according to general procedure B.



### 3. General procedures for the synthesis of naphtho[1,2-*b*]furan derivatives

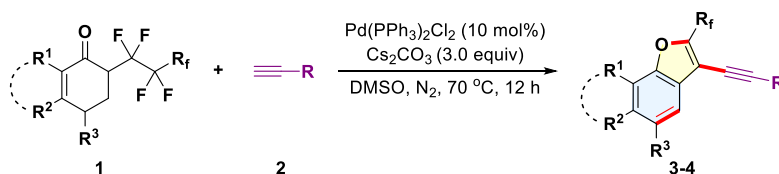

A solution of fluoroalkyl ketones **1** (0.3 mmol), alkyne **2** (0.45 mmol), Pd(PPh<sub>3</sub>)<sub>2</sub>Cl<sub>2</sub> (21 mg, 0.03 mmol), and Cs<sub>2</sub>CO<sub>3</sub> (293 mg, 0.9 mmol) in DMSO (3.0 mL) was stirred under N<sub>2</sub> atmosphere at 70 °C for 12 h. The reaction was then quenched by saturated NH<sub>4</sub>Cl solution (20 mL) and extracted with EtOAc (20 mL x 3). The organic layer was washed with saturated brine twice, dried over MgSO<sub>4</sub>, filtered, and concentrated under reduced pressure. The crude product was purified by flash column chromatography (300-400 mesh) using petroleum ether/ethyl acetate (500/1 ~ 50/1) as eluent to afford the pure products **3-4**.

### 4. General procedure for the reaction of $\alpha$ -perfluorobutyl tetralone (1a) with 1-(buta-1,3-diy-1-yl)-4-methoxybenzene (2q)

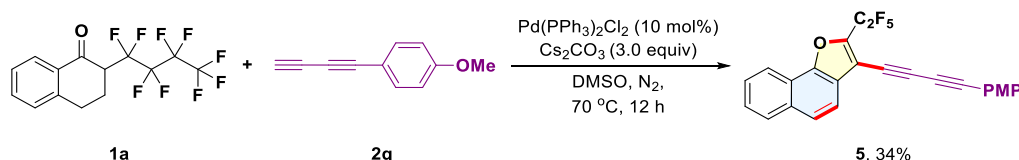

A solution of  $\alpha$ -perfluorobutyl tetralone (**1a**, 73 mg, 0.2 mmol), 1-(buta-1,3-diy-1-yl)-4-methoxybenzene (**2q**, 47 mg, 0.3 mmol), Pd(PPh<sub>3</sub>)<sub>2</sub>Cl<sub>2</sub> (14 mg, 0.02 mmol), and Cs<sub>2</sub>CO<sub>3</sub> (196 mg, 0.6 mmol) in DMSO (2.0 mL) was stirred under N<sub>2</sub> atmosphere at 70 °C for 12 h. The reaction was then quenched by saturated NH<sub>4</sub>Cl solution (20 mL) and extracted with EtOAc (20 mL x 3). The organic layer was washed with saturated brine twice, dried over MgSO<sub>4</sub>, filtered, and concentrated under reduced pressure. The crude product was purified by flash column chromatography (300-400 mesh) using petroleum ether/ethyl acetate (500/1 ~ 100/1) as eluent to afford the pure product **5** (30 mg, 34% yield).

### 5. General procedure for the reaction of $\alpha$ -perfluorobutyl tetralone (1a) with (*E*)-but-1-en-3-yn-1-ylbenzene (2r)

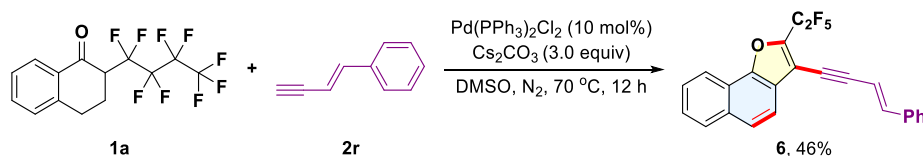

A solution of  $\alpha$ -perfluorobutyl tetralone (**1a**, 73 mg, 0.2 mmol), (*E*)-but-1-en-3-yn-1-ylbenzene (**2r**, 39 mg, 0.3 mmol), Pd(PPh<sub>3</sub>)<sub>2</sub>Cl<sub>2</sub> (14 mg, 0.02 mmol), and Cs<sub>2</sub>CO<sub>3</sub> (196 mg, 0.6 mmol) in DMSO (2.0 mL) was stirred under N<sub>2</sub> atmosphere at 70 °C for 12 h. The reaction was then quenched by saturated NH<sub>4</sub>Cl solution (20 mL) and extracted with EtOAc (20 mL x 3). The organic layer was washed with saturated brine twice, dried over MgSO<sub>4</sub>, filtered, and concentrated under reduced pressure. The crude product was purified by flash column chromatography (300-400 mesh) using petroleum ether/ethyl acetate (500/1) as eluent to afford the pure product **6** (38 mg, 46% yield).

## 6. Large-scale synthesis of product 3aa

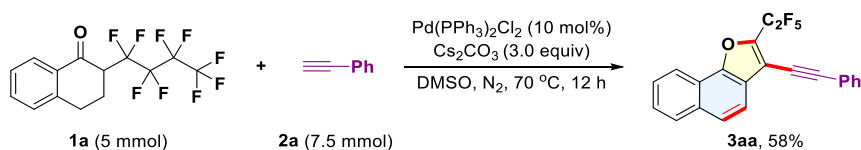

A solution of  $\alpha$ -perfluorobutyl tetralone (**1a**, 1821 mg, 5 mmol), ethynylbenzene (**2a**, 766 mg, 7.5 mmol), Pd(PPh<sub>3</sub>)<sub>2</sub>Cl<sub>2</sub> (351 mg, 0.5 mmol), and Cs<sub>2</sub>CO<sub>3</sub> (4887 mg, 15 mmol) in DMSO (50 mL) was stirred under N<sub>2</sub> atmosphere at 70 °C for 12 h. The reaction was then quenched by saturated NH<sub>4</sub>Cl solution (100 mL) and extracted with EtOAc (50 mL x 3). The organic layer was washed with saturated brine twice, dried over MgSO<sub>4</sub>, filtered, and concentrated under reduced pressure. The crude product was purified by flash column chromatography (300-400 mesh) using petroleum ether/ethyl acetate (500/1 ~ 200/1) as eluent to afford the pure product **3aa** (1130 mg, 58% yield).

## 7. Further applications for the synthesis of complex molecules

### 1) Reduction reaction of product 3aa

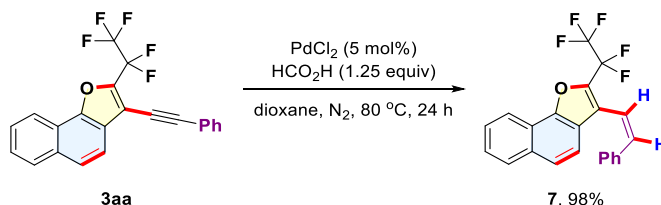

A solution of **3aa** (77 mg, 0.2 mmol), PdCl<sub>2</sub> (2 mg, 0.01 mmol), and HCO<sub>2</sub>H (12 mg, 0.25 mmol) in 1,4-dioxane (2 mL) was stirred under N<sub>2</sub> atmosphere at 80 °C for 24 h. The reaction was then quenched by saturated NH<sub>4</sub>Cl solution (20 mL) and extracted with EtOAc (20 mL x 3). The organic layer was washed with saturated brine twice, dried over MgSO<sub>4</sub>, filtered, and concentrated under reduced pressure. The crude product was purified by flash column chromatography (300-400 mesh) using petroleum ether/ethyl acetate (500/1) as eluent to afford the pure product **7** (66 mg, 98% yield).

### 2) Hydroamination reaction of product 3aa with indole

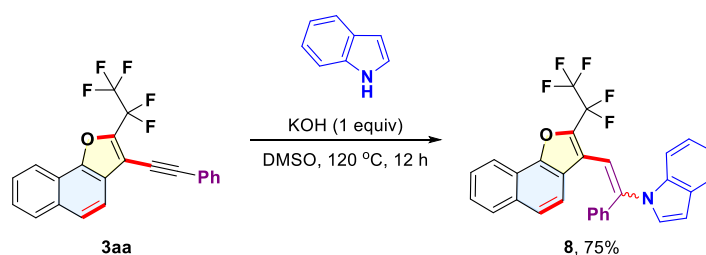

A solution of **3aa** (77 mg, 0.2 mmol), indole (47 mg, 0.4 mmol), and KOH (56 mg, 0.2 mmol) in DMSO (1 mL) was stirred under N<sub>2</sub> atmosphere at 120 °C for 12 h. The reaction was then quenched by saturated NH<sub>4</sub>Cl solution (20 mL) and extracted with EtOAc (20 mL x 3). The organic layer was washed with saturated brine twice, dried over MgSO<sub>4</sub>, filtered, and concentrated under reduced pressure. The crude product was purified by flash column chromatography (300-400 mesh) using petroleum ether/ethyl acetate (500/1 ~ 200/1) as eluent to afford the pure product **8** (58 mg, 75% yield).

### 3) Reduction reaction of product **3aa**

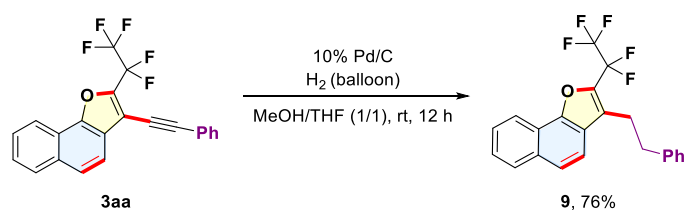

A solution of **3aa** (77 mg, 0.02 mmol) and 10% Pd/C (21 mg) in MeOH/THF (1 mL/1 mL) was stirred under H<sub>2</sub> atmosphere at room temperature for 12 h. The mixture was filtered through celite pad, and washed with EtOAc (10 ml x 3). The filtrate was concentrated under reduced pressure. The crude product was purified by flash column chromatography (300-400 mesh) using petroleum ether/ethyl acetate (500/1) as eluent to afford the pure product **9** (60 mg, 76% yield).

### 4) Iodocyclization reaction of product **3ag**

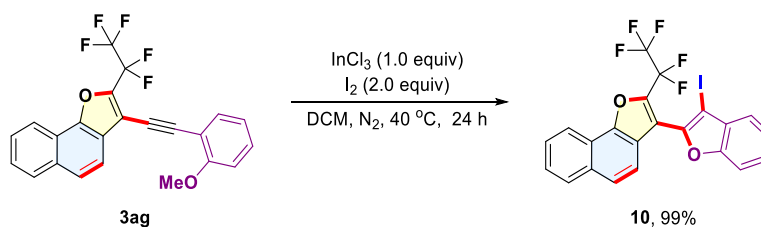

A solution of **3ag** (42 mg, 0.1 mmol), InCl<sub>3</sub> (22 mg, 0.1 mmol), and I<sub>2</sub> (51 mg, 0.2 mmol) in DCM (3 mL) was stirred under N<sub>2</sub> atmosphere at 40 °C for 24 h. The reaction was then quenched by saturated NH<sub>4</sub>Cl solution (20 mL) and extracted with EtOAc (20 mL x 3). The organic layer was washed with saturated brine twice, dried over MgSO<sub>4</sub>, filtered, and concentrated under reduced pressure. The crude product was purified by flash column chromatography (300-400 mesh) using petroleum ether/ethyl acetate (200/1) as eluent to afford the pure product **10** (52 mg, 99% yield).

## 8. Optimization of reaction conditions

**Table S1.** Optimization of the reaction solvent<sup>a</sup>

$\text{1a} + \text{2a} \xrightarrow[\text{solvent, N}_2, 70\text{ }^\circ\text{C, 12 h}]{\text{Pd(PPh}_3)_2\text{Cl}_2 (10\text{ mol\%}), \text{Cs}_2\text{CO}_3 (3.0\text{ equiv})}$

| Entry | Solvent            | Yield of 3aa (%) <sup>b</sup> |
|-------|--------------------|-------------------------------|
| 1     | DMSO               | 58 (55) <sup>c</sup>          |
| 2     | DMF                | 36                            |
| 3     | MeCN               | 14                            |
| 4     | CHCl <sub>3</sub>  | trace                         |
| 5     | 1,4-dioxane        | trace                         |
| 6     | toluene            | trace                         |
| 7     | DCE                | trace                         |
| 8     | <sup>t</sup> BuOAc | <5                            |
| 9     | <sup>t</sup> BuOH  | <5                            |

<sup>a</sup> Reaction conditions: 2-(perfluorobutyl)-3,4-dihydronaphthalen-1(2H)-one (**1a**, 0.30 mmol), phenylacetylene (**2a**, 0.45 mmol), Pd(PPh<sub>3</sub>)<sub>2</sub>Cl<sub>2</sub> (0.03 mmol), and Cs<sub>2</sub>CO<sub>3</sub> (0.90 mmol) in solvent (2.0 mL) at 70 °C for 12 h under N<sub>2</sub>. <sup>b</sup> Yields were determined by NMR analysis with 1,4-dimethoxybenzene as an internal standard. <sup>c</sup> Isolated yield.

**Table S2.** Optimization of the reaction temperature<sup>a</sup>

$\text{1a} + \text{2a} \xrightarrow[\text{DMSO, N}_2, \text{Temp., 12 h}]{\text{Pd(PPh}_3)_2\text{Cl}_2 (10\text{ mol\%}), \text{Cs}_2\text{CO}_3 (3.0\text{ equiv})}$

| Entry | Temperature (°C) | Yield of 3aa (%) <sup>b</sup> |
|-------|------------------|-------------------------------|
| 1     | rt               | 34                            |
| 2     | 50               | 52                            |
| 3     | 70               | 58 (55) <sup>c</sup>          |
| 4     | 90               | 56                            |

<sup>a</sup> Reaction conditions: 2-(perfluorobutyl)-3,4-dihydronaphthalen-1(2H)-one (**1a**, 0.30 mmol), phenylacetylene (**2a**, 0.45 mmol), Pd(PPh<sub>3</sub>)<sub>2</sub>Cl<sub>2</sub> (0.03 mmol), and Cs<sub>2</sub>CO<sub>3</sub> (0.90 mmol) in DMSO (2.0 mL) at rt-90 °C for 12 h under N<sub>2</sub>. <sup>b</sup> Yields were determined by NMR analysis with 1,4-dimethoxybenzene as an internal standard. <sup>c</sup> Isolated yield.



|           |                                                                                |                                |
|-----------|--------------------------------------------------------------------------------|--------------------------------|
| 21        | Pd(PPh <sub>3</sub> ) <sub>2</sub> Cl <sub>2</sub> (10)/Antioxidant 168 (20)   | 24 <sup>d</sup>                |
| 22        | Pd(PPh <sub>3</sub> ) <sub>2</sub> Cl <sub>2</sub> (10)/CuI (10)               | 49 <sup>d</sup>                |
| 23        | Pd(PPh <sub>3</sub> ) <sub>2</sub> Cl <sub>2</sub> (10)/CoBr <sub>2</sub> (10) | 54 <sup>d</sup>                |
| 24        | Pd(PPh <sub>3</sub> ) <sub>2</sub> Cl <sub>2</sub> (10)/ZnBr <sub>2</sub> (10) | 27 <sup>d</sup>                |
| 25        | Pd(PPh <sub>3</sub> ) <sub>2</sub> Cl <sub>2</sub> (10)/NaI (10)               | 52 <sup>d</sup>                |
| 26        | Pd(PPh <sub>3</sub> ) <sub>2</sub> Cl <sub>2</sub> (10)/TBAB (100)             | trace                          |
| <b>27</b> | <b>Pd(PPh<sub>3</sub>)<sub>2</sub>Cl<sub>2</sub> (10)</b>                      | <b>62 (58)<sup>c,d,e</sup></b> |

<sup>a</sup> Reaction conditions: 2-(perfluorobutyl)-3,4-dihydronaphthalen-1(2*H*)-one (**1a**, 0.3 mmol), phenylacetylene (**2a**, 0.36 mmol), catalyst (0.015-0.03 mmol), ligand (0-0.06 mmol), and Cs<sub>2</sub>CO<sub>3</sub> (0.90 mmol) in DMSO (2.0 mL) at 70 °C for 12 h under N<sub>2</sub>. <sup>b</sup> Yields were determined by NMR analysis with 1,4-dimethoxybenzene as an internal standard.

<sup>c</sup> Isolated yield. <sup>d</sup> 0.45 mmol of **2a** was used. <sup>e</sup> In 3.0 mL of DMSO.

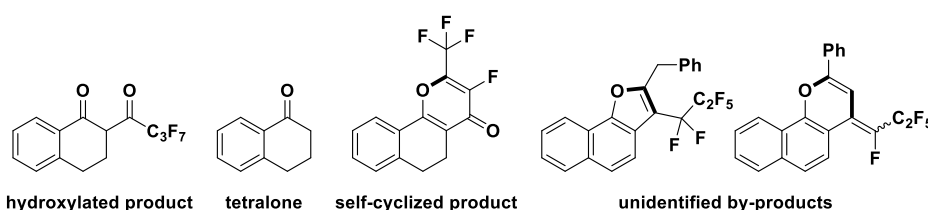

**Notice:** Moderate yield of the model reaction was obtained under the optimal reaction conditions because the starting material of 2-(perfluorobutyl)-3,4-dihydronaphthalen-1(2*H*)-one (**1a**) is unstable under the palladium catalytic system. 2-(2,2,3,3,4,4,4-Heptafluorobutanoyl)-3,4-dihydronaphthalen-1(2*H*)-one (via hydrodefluorination of **1a**), tetralone (via C-C bond cleavage of **1a**), 3-fluoro-2-(trifluoromethyl)-5,6-dihydro-4*H*-benzo[*h*]chromen-4-one (via self-cyclization), and some unidentified by-products were observed.

**Table S5.** Optimization of the base<sup>a</sup>

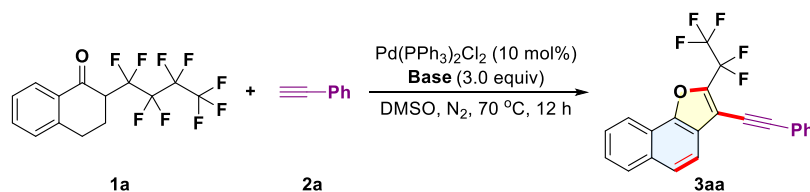

| Entry | Base                           | Yield of <b>3aa</b> (%) <sup>b</sup> |
|-------|--------------------------------|--------------------------------------|
| 1     | K <sub>2</sub> CO <sub>3</sub> | 24                                   |
| 2     | DABCO                          | 48                                   |
| 3     | DBU                            | <5                                   |
| 4     | Et <sub>3</sub> N              | 30                                   |
| 5     | NaOH                           | trace                                |
| 6     | CsF                            | 58                                   |
| 7     | <sup>t</sup> BuOK              | 18                                   |

<sup>a</sup> Reaction conditions: 2-(perfluorobutyl)-3,4-dihydronaphthalen-1(2*H*)-one (**1a**, 0.3 mmol), phenylacetylene (**2a**, 0.45 mmol), Pd(PPh<sub>3</sub>)<sub>2</sub>Cl<sub>2</sub> (0.03 mmol), and base (0.90 mmol) in DMSO (3.0 mL) at 70 °C for 12 h under N<sub>2</sub>. <sup>b</sup> Yields were determined by NMR analysis with 1,4-dimethoxybenzene as an internal standard.

## 9. Mechanistic studies

### 1) Detection of the key intermediate 2-(1,4,4,4,4,4-octafluoro-4 $\lambda^8$ -but-2-yn-1-ylidene)-3,4-dihydronaphthalen-1(2H)-one (**11**)

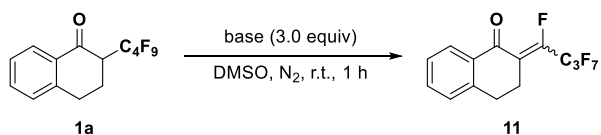

| 1a                              |                 | base              |                   | 11                |                   |
|---------------------------------|-----------------|-------------------|-------------------|-------------------|-------------------|
| base                            | yield           | base              | yield             | base              | yield             |
| Cs <sub>2</sub> CO <sub>3</sub> | 82% (Z/E = 1/1) | Et <sub>3</sub> N | 95% (Z/E = 1/3)   | NaOH              | 51% (Z/E = 1/2.6) |
| DABCO                           | 0%              | <sup>t</sup> BuOK | 37% (Z/E = 1/2.5) | KHCO <sub>3</sub> | 92% (Z/E = 1/1.2) |

A solution of 2-(perfluorobutyl)-3,4-dihydronaphthalen-1(2H)-one (**1a**, 73 mg, 0.2 mmol) and base (0.6 mmol) in DMSO (2.0 mL) was stirred under N<sub>2</sub> atmosphere at room temperature for 1 h. The reaction was then quenched by saturated NH<sub>4</sub>Cl solution (20 mL) and extracted with EtOAc (20 mL x 3). The organic layer was washed with saturated brine twice, dried over MgSO<sub>4</sub>, filtered, and concentrated under reduced pressure. The crude product was purified by flash column chromatography (300-400 mesh) using petroleum ether/ethyl acetate (500/1) as eluent to afford the pure 2-(1,4,4,4,4,4-octafluoro-4 $\lambda^8$ -but-2-yn-1-ylidene)-3,4-dihydronaphthalen-1(2H)-one (**11**, 0~95% yield, Z/E = 1/1 ~ 1/3). This result suggested that compound **11** was the possible reaction intermediate.

#### <sup>1</sup>H, <sup>19</sup>F, and <sup>13</sup>C NMR spectra of compound **11** (Cs<sub>2</sub>CO<sub>3</sub> as base):

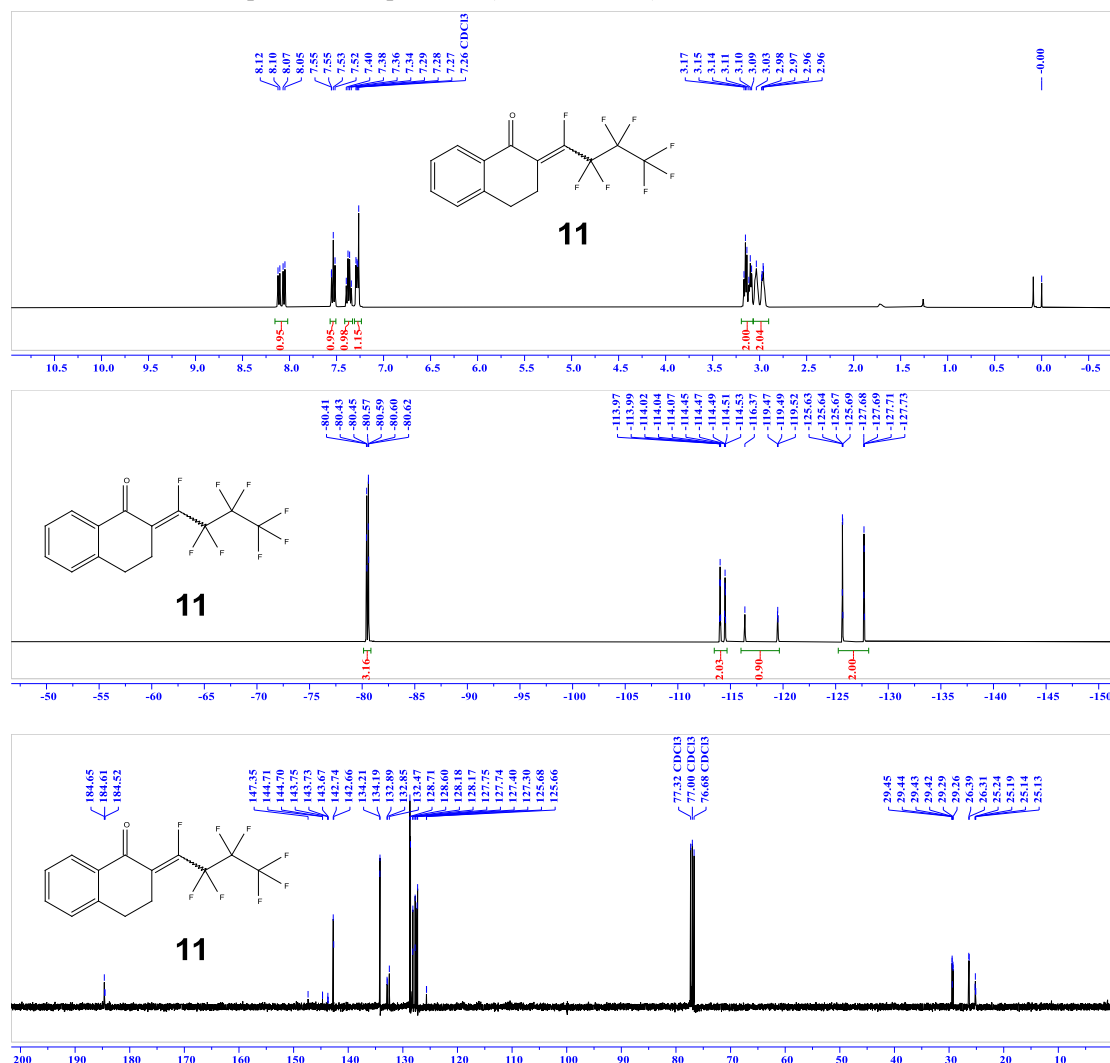

## HRMS of compound 11:

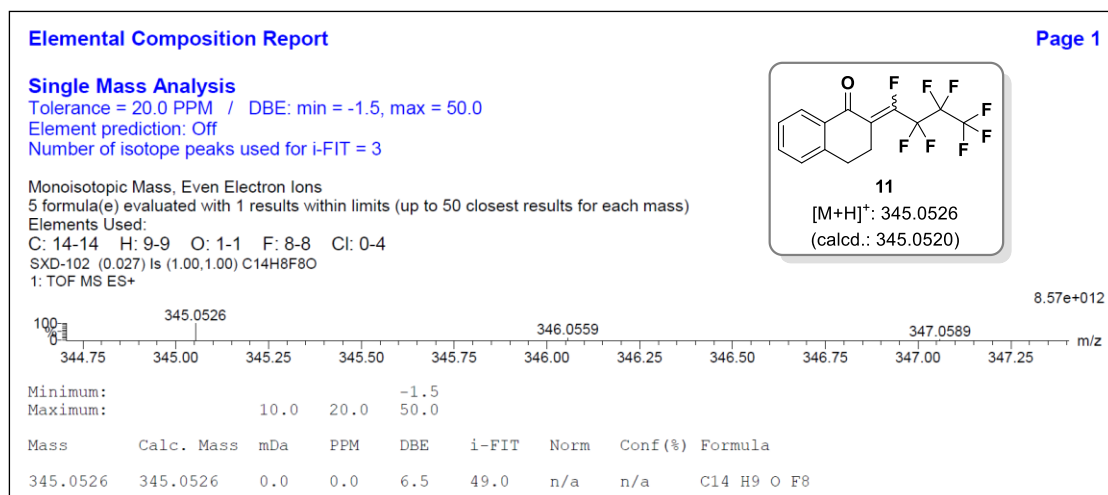

## <sup>19</sup>F NMR spectra of compound 11 (Et<sub>3</sub>N as base):

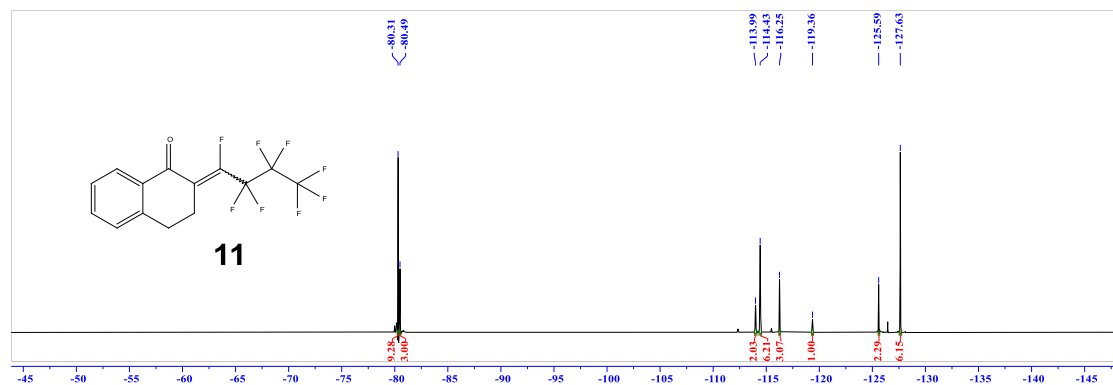

## <sup>19</sup>F NMR spectra of compound 11 (tBuOK as base):

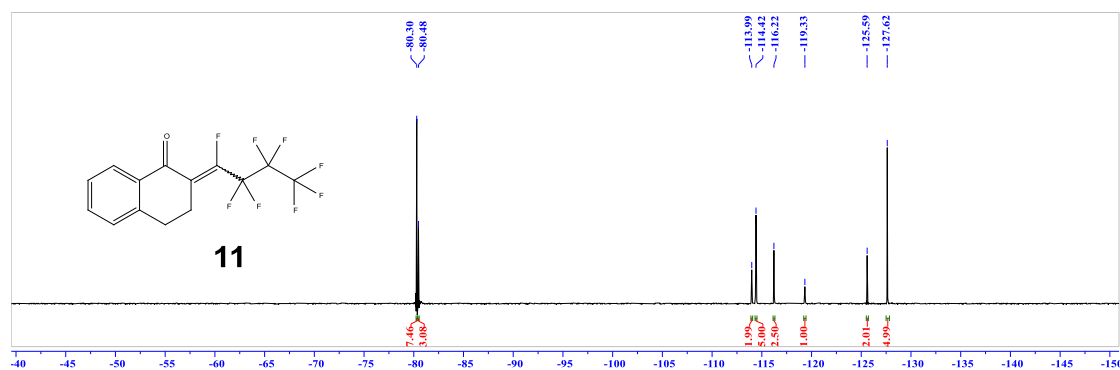



### <sup>19</sup>F NMR spectra of compound **11** (NaOH as base):

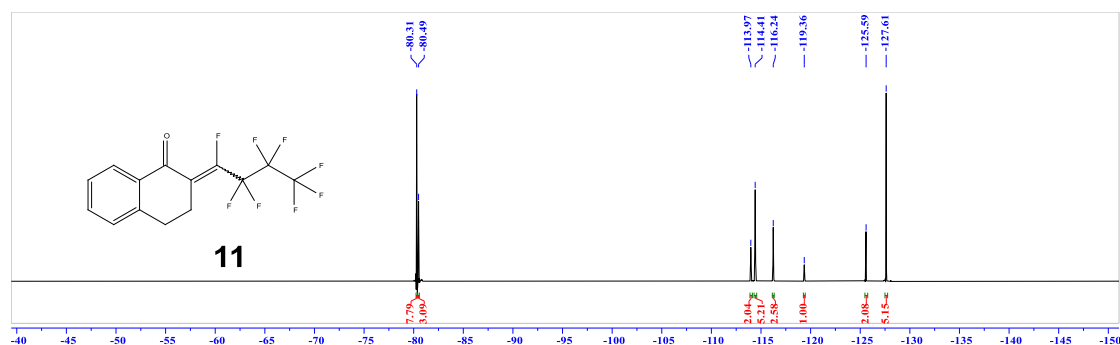

### <sup>19</sup>F spectra of compound **11** (KHCO<sub>3</sub> as base):

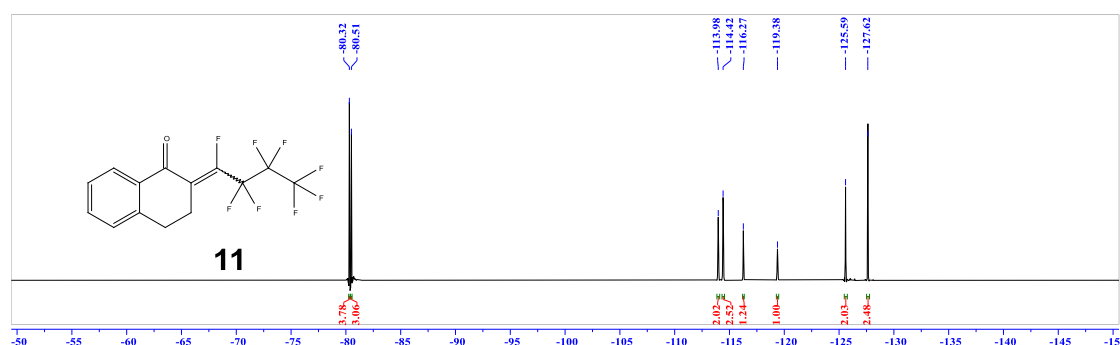

### 2) The reaction of compound **11** with ethynylbenzene (**2a**)

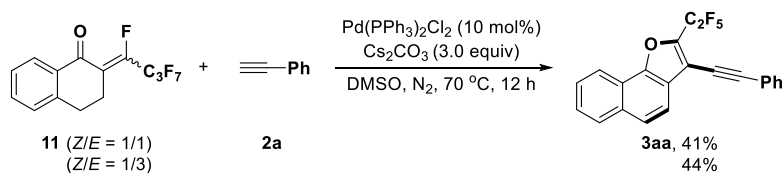

A solution of compound **11** (52 mg, 0.15 mmol), phenylacetylene (**2a**, 23 mg, 0.225 mmol), Pd(PPh<sub>3</sub>)<sub>2</sub>Cl<sub>2</sub> (11 mg, 0.015 mmol), and Cs<sub>2</sub>CO<sub>3</sub> (147 mg, 0.45 mmol) in DMSO (2.0 mL) was stirred under N<sub>2</sub> atmosphere at 70 °C for 12 h. The reaction was then quenched by saturated NH<sub>4</sub>Cl solution (20 mL) and extracted with EtOAc (20 mL x 3). The organic layer was washed with saturated brine twice, dried over MgSO<sub>4</sub>, filtered, and concentrated under reduced pressure. The crude product was purified by flash column chromatography (300-400 mesh) using petroleum ether/ethyl acetate (200/1) as eluent to afford the pure product **3aa**. **This result further suggested that compound **11** was the possible reaction intermediate.**

### 3) The reaction of compound **11** with (phenylethynyl)lithium (**12**)

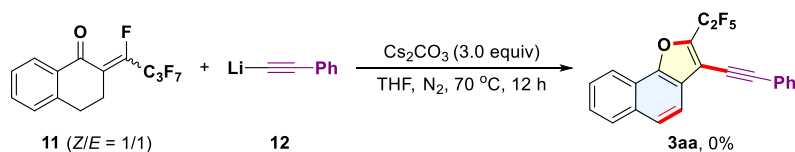

**Step I:** A solution of phenylacetylene (**2a**, 31 mg, 0.3 mmol) in dry THF (2 mL) was cooled to -78 °C and then *n*-butyllithium (*n*BuLi, 0.15 mL, 0.36 mmol, 2.5 mol/L in THF) was dropwise added to the reaction mixture over 1 h. After removal of the solvent of above reaction mixture, the formed crude (phenylethynyl)lithium (**12**) was directly

used in the next step without further purification.

**Step 2:** A solution of compound **11** (69 mg, 0.2 mmol), (phenylethynyl)lithium (**12**), and Cs<sub>2</sub>CO<sub>3</sub> (196 mg, 0.6 mmol) in THF (2.0 mL) was stirred under N<sub>2</sub> atmosphere at 70 °C for 12 h. No desired product **3aa** was obtained. **This result suggested that nucleophilic addition-elimination was not the main pathway for the intermolecular coupling.**

#### 4) Detection of proposed endocyclic naphthalen-1(4H)-one **13**

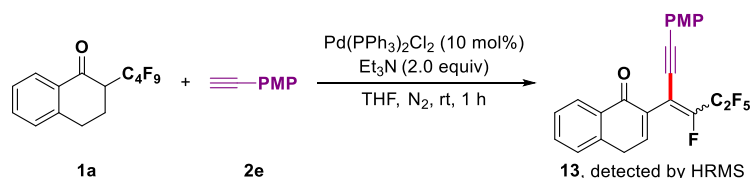

A solution of 2-(perfluorobutyl)-3,4-dihydronaphthalen-1(2H)-one (**1a**, 109 mg, 0.3 mmol), 1-ethynyl-4-methoxybenzene (**2e**, 59 mg, 0.45 mmol), Pd(PPh<sub>3</sub>)<sub>2</sub>Cl<sub>2</sub> (21 mg, 0.03 mmol), and Et<sub>3</sub>N (61 mg, 0.6 mmol) in THF (3.0 mL) was stirred under N<sub>2</sub> atmosphere at room temperature for 1 h. **Proposed endocyclic naphthalen-1(4H)-one **13** could be detected by HRMS, suggesting that intermediate **13** might be involved in the reaction.**

#### HRMS of intermediate **13**:

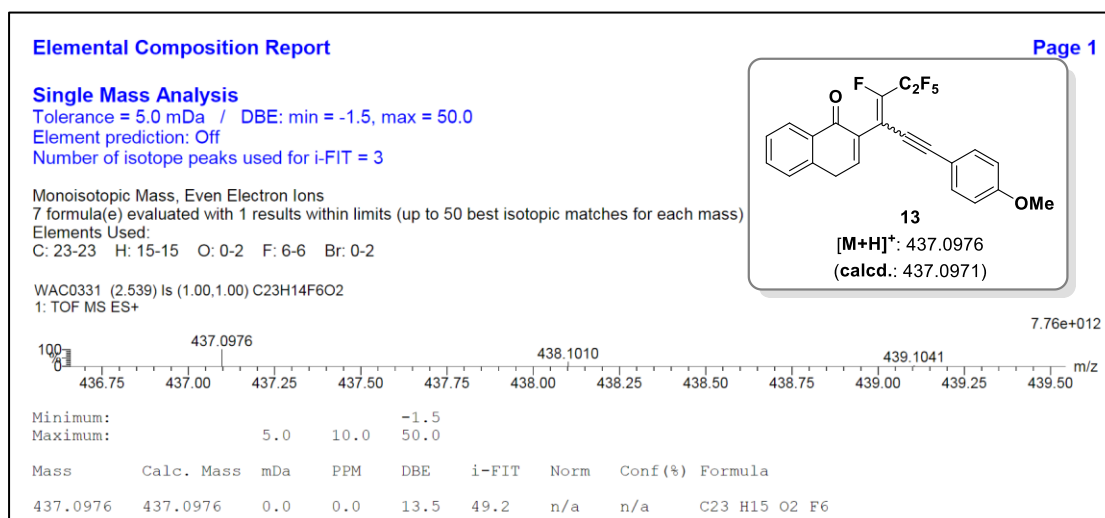

#### 5) The formation of intermediate 2-(2,2,3,3,4,4,4-heptafluorobutanoyl)-3,4-dihydronaphthalen-1(2H)-one (**14**) in the absence of Pd(PPh<sub>3</sub>)<sub>2</sub>Cl<sub>2</sub> catalyst

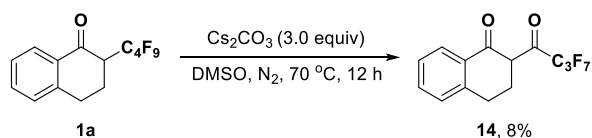

A solution of 2-(perfluorobutyl)-3,4-dihydronaphthalen-1(2H)-one (**1a**, 109 mg, 0.3 mmol) and Cs<sub>2</sub>CO<sub>3</sub> (293 mg, 0.9 mmol) in DMSO (3.0 mL) was stirred under N<sub>2</sub> atmosphere at 70 °C for 12 h. The reaction was then quenched by saturated NH<sub>4</sub>Cl solution (20 mL) and extracted with EtOAc (20 mL x 3). The organic layer was washed with saturated brine twice, dried over MgSO<sub>4</sub>, filtered, and concentrated under reduced pressure. The crude product was purified by flash column chromatography (300-400 mesh) using petroleum ether/ethyl acetate (200/1) as eluent to afford the pure product **14** (8 mg, 8% yield). **This result suggested that compound **14** may also come from base-**

promoted fluorine elimination of **11** without involving Pd species.

NMR spectra of compound **14**:

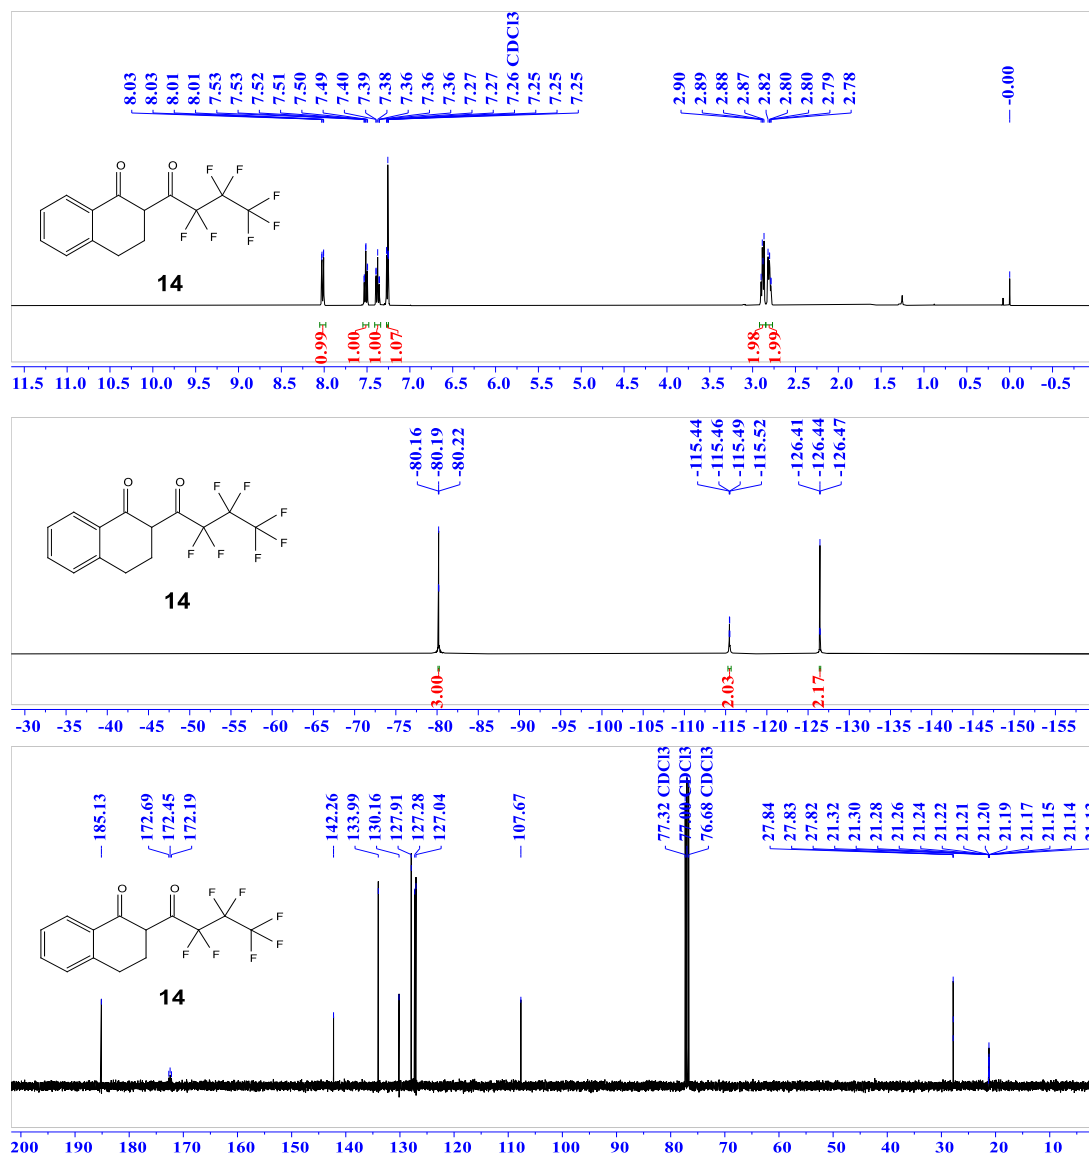

6)  $^{19}\text{F}$ ,  $^{31}\text{P}$  NMR, and HRMS analysis of intermediate **15**

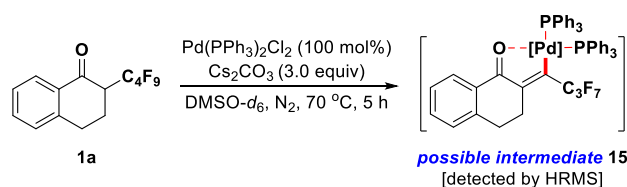

A solution of 2-(perfluorobutyl)-3,4-dihydronaphthalen-1(2H)-one (**1a**, 109 mg, 0.3 mmol),  $\text{Pd}(\text{PPh}_3)_2\text{Cl}_2$  (211 mg, 0.3 mmol), and  $\text{Cs}_2\text{CO}_3$  (293 mg, 0.9 mmol) in  $\text{DMSO-}d_6$  (3.0 mL) was stirred under  $\text{N}_2$  atmosphere at 70 °C for 5 h. The reaction mixture was analyzed by  $^{19}\text{F}$  and  $^{31}\text{P}$  NMR.

a)  $^{19}\text{F}$  NMR spectra of compound 1a

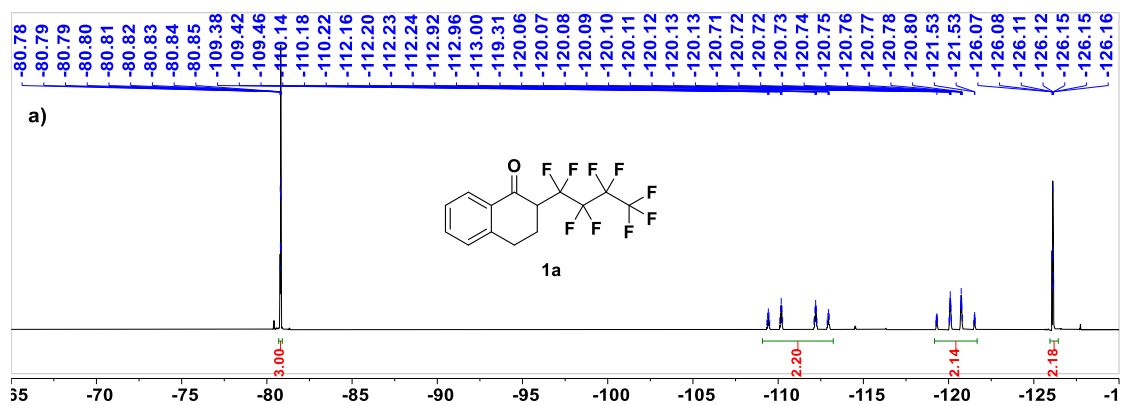

b)  $^{19}\text{F}$  NMR spectra of intermediate 11

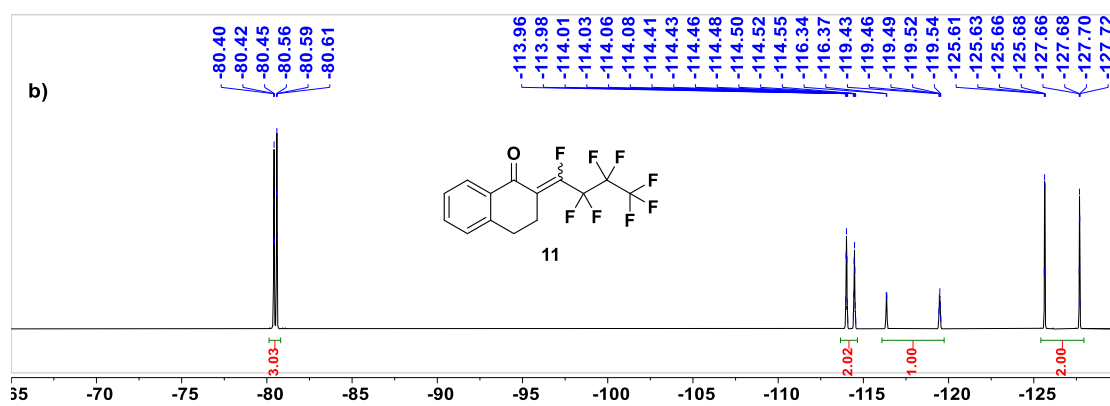

c)  $^{19}\text{F}$  NMR spectra of reaction mixture

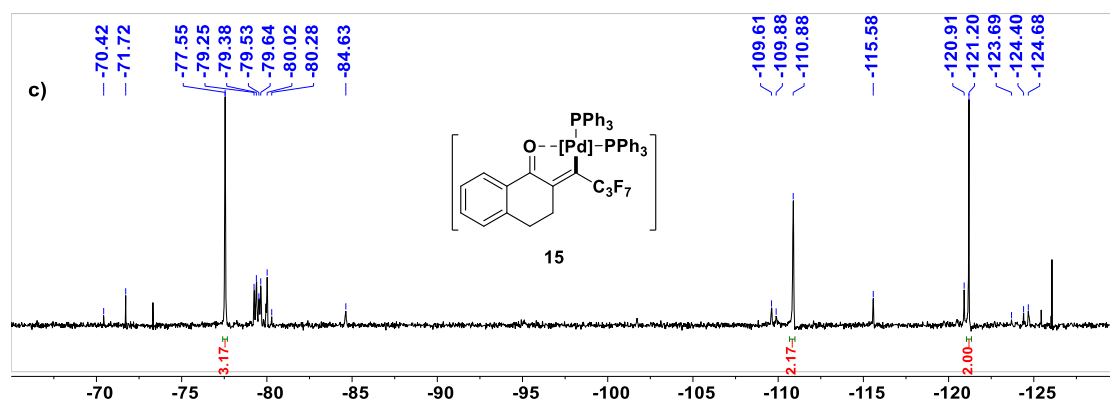

d)  $^{31}\text{P}$  NMR spectra of  $\text{Pd}(\text{PPh}_3)_2\text{Cl}_2$ <sup>[3]</sup>

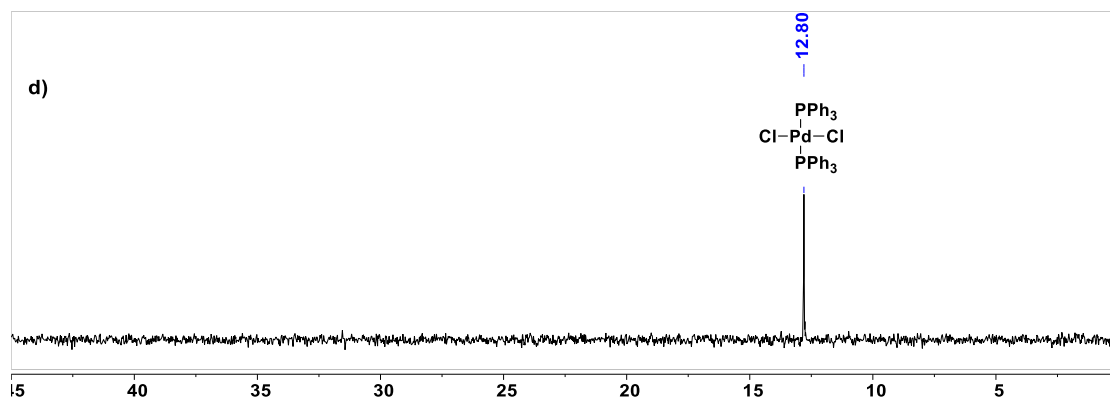

e)  $^{31}\text{P}$  NMR spectra of reaction mixture<sup>[3]</sup>

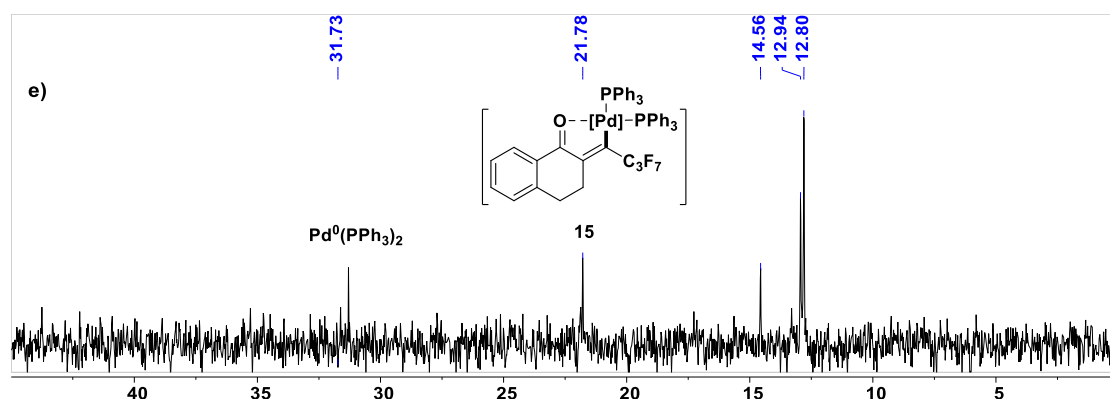

HRMS of vinylpalladium 15:

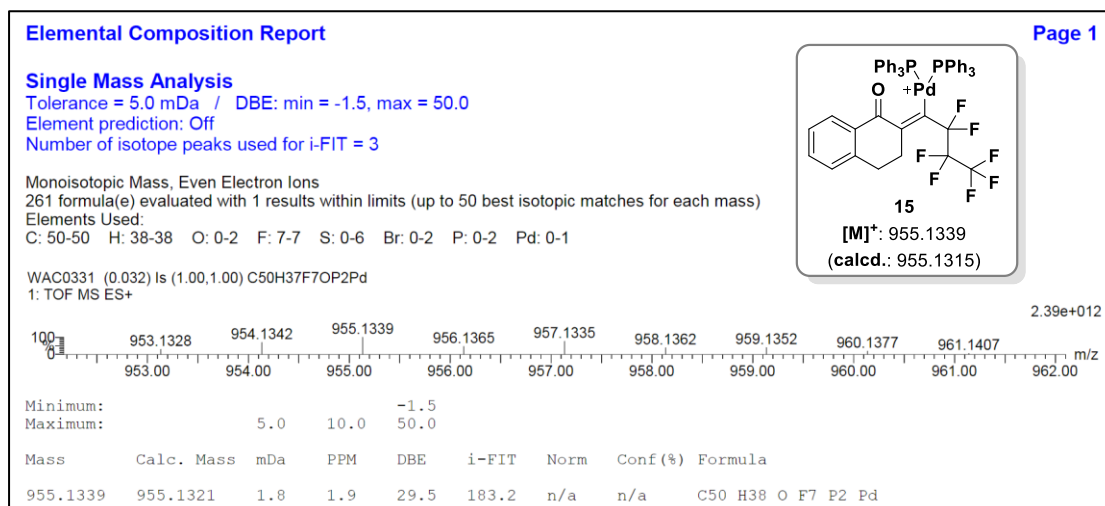

## 10. Characterization data for products

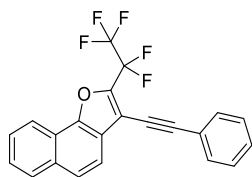

### 2-(Perfluoroethyl)-3-(phenylethynyl)naphtho[1,2-*b*]furan (3aa):

Yield = 58% (67 mg). White solid. M.p. 125.2–126.9 °C.

**IR** (KBr):  $\nu = 3015, 2224, 1582, 808, 740 \text{ cm}^{-1}$ .

**<sup>1</sup>H NMR** (400 MHz, CDCl<sub>3</sub>):  $\delta = 8.33 - 8.27$  (m, 1H), 7.97 – 7.90 (m, 1H), 7.76 (s, 2H), 7.65 – 7.54 (m, 4H), 7.40 – 7.35 (m, 3H) ppm.

**<sup>19</sup>F NMR** (376 MHz, CDCl<sub>3</sub>):  $\delta = -83.57$  (t,  $J = 3.4$  Hz, 3F), -114.34 (q,  $J = 3.4$  Hz, 2F) ppm.

**<sup>13</sup>C NMR** (100 MHz, CDCl<sub>3</sub>):  $\delta = 151.0, 141.6$  (t,  $J_{\text{C-F}} = 30.1$  Hz), 132.9, 132.5, 131.8, 129.1, 128.4, 127.1, 126.9, 125.3, 123.4, 122.3, 120.8, 120.3, 118.3, 109.4 (m), 98.1, 76.3 ppm; carbons corresponding to the C<sub>2</sub>F<sub>5</sub> group cannot be identified due to C-F coupling.

**HRMS** (m/z): calcd for C<sub>22</sub>H<sub>12</sub>F<sub>5</sub>O [M+H]<sup>+</sup> 387.0803, found: 387.0805.

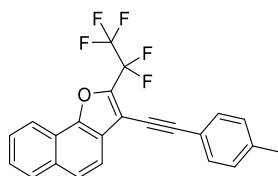

### 2-(Perfluoroethyl)-3-(*p*-tolylethynyl)naphtho[1,2-*b*]furan (3ab):

Yield = 64% (76 mg). White solid. M.p. 143.4-145.2 °C.

**IR** (KBr):  $\nu = 3030, 2227, 1597, 1508, 809, 744 \text{ cm}^{-1}$ .

**<sup>1</sup>H NMR** (400 MHz, CDCl<sub>3</sub>):  $\delta = 8.33$  (d,  $J = 8.0$  Hz, 1H), 7.97 (d,  $J = 8.0$  Hz, 1H), 7.79 (t,  $J = 9.0$  Hz, 2H), 7.69 – 7.63 (m, 1H), 7.62 – 7.56 (m, 1H), 7.50 (d,  $J = 8.0$  Hz, 2H), 7.20 (d,  $J = 7.9$  Hz, 2H), 2.39 (s, 3H) ppm.

**<sup>19</sup>F NMR** (376 MHz, CDCl<sub>3</sub>):  $\delta = -83.56$  (t,  $J = 3.9$  Hz, 3F), -114.31 (q,  $J = 3.9$  Hz, 2F) ppm.

**<sup>13</sup>C NMR** (100 MHz, CDCl<sub>3</sub>):  $\delta = 151.0$  (t,  $J_{\text{C-F}} = 1.4$  Hz), 141.5 (t,  $J_{\text{C-F}} = 30.1$  Hz), 139.4, 133.0, 131.7, 129.2, 128.5, 127.2, 126.9, 125.3, 123.5 (t,  $J_{\text{C-F}} = 1.3$  Hz), 120.9, 120.4, 119.3, 118.4, 109.6 (m), 98.6 (t,  $J_{\text{C-F}} = 1.4$  Hz), 75.7 (t,  $J_{\text{C-F}} = 1.4$  Hz), 21.6 ppm; carbons corresponding to the C<sub>2</sub>F<sub>5</sub> group cannot be identified due to C-F coupling.

**HRMS** (m/z): calcd for C<sub>23</sub>H<sub>14</sub>F<sub>5</sub>O [M+H]<sup>+</sup> 401.0959, found: 401.0957.

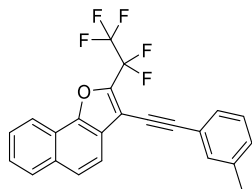

### 2-(Perfluoroethyl)-3-(*m*-tolylethynyl)naphtho[1,2-*b*]furan (3ac):

Yield = 65% (78 mg). Yellow solid. M.p. 119.2-119.9 °C.

**IR** (KBr):  $\nu = 2928, 2218, 1617, 807, 742 \text{ cm}^{-1}$ .

**<sup>1</sup>H NMR** (400 MHz, CDCl<sub>3</sub>):  $\delta 8.28$  (d,  $J = 8.0$  Hz, 1H), 7.91 (d,  $J = 7.9$  Hz, 1H), 7.74 (d,  $J = 2.0$  Hz, 2H), 7.64 – 7.52 (m, 2H), 7.40 (d,  $J = 7.0$  Hz, 2H), 7.25 (t,  $J = 8.0$  Hz, 1H), 7.18 (t,  $J = 6.0$  Hz, 1H), 2.36 (s, 3H) ppm.

**<sup>19</sup>F NMR** (376 MHz, CDCl<sub>3</sub>):  $\delta = -83.51$  (t,  $J = 3.5$  Hz, 3F), -114.24 (q,  $J = 3.5$  Hz, 2F) ppm.

$^{13}\text{C}$  NMR (100 MHz,  $\text{CDCl}_3$ ):  $\delta$  = 151.0 (t,  $J_{\text{C-F}}$  = 1.1 Hz), 141.5 (t,  $J_{\text{C-F}}$  = 30.2 Hz), 138.2, 133.0, 132.3, 130.0, 128.9, 128.4, 128.4, 127.1, 126.9, 125.3, 123.5 (t,  $J_{\text{C-F}}$  = 1.1 Hz), 122.1, 120.9, 120.3, 118.3, 109.5 (t,  $J_{\text{C-F}}$  = 2.7 Hz), 98.4 (t,  $J_{\text{C-F}}$  = 1.4 Hz), 75.9 (t,  $J_{\text{C-F}}$  = 0.9 Hz), 21.2 ppm; carbons corresponding to the  $\text{C}_2\text{F}_5$  group cannot be identified due to C-F coupling.

HRMS (m/z): calcd for  $\text{C}_{23}\text{H}_{14}\text{F}_5\text{O}$   $[\text{M}+\text{H}]^+$  401.0959, found: 401.0959.

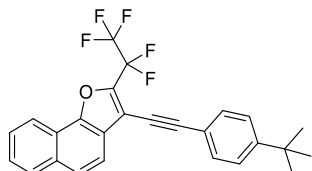

**3-((4-(*tert*-Butyl)phenyl)ethynyl)-2-(perfluoroethyl)naphtho[1,2-*b*]furan (3ad):**

Yield = 64% (85 mg). Light yellow solid. M.p. 109.0-109.7 °C.

IR (KBr):  $\nu$  = 2968, 2221, 1613, 812, 753  $\text{cm}^{-1}$ .

$^1\text{H}$  NMR (400 MHz,  $\text{CDCl}_3$ ):  $\delta$  = 8.31 (d,  $J$  = 8.1 Hz, 1H), 7.94 (d,  $J$  = 8.0 Hz, 1H), 7.76 (d,  $J$  = 1.4 Hz, 2H), 7.66 – 7.51 (m, 4H), 7.41 (d,  $J$  = 8.4 Hz, 2H), 1.33 (s, 9H) ppm.

$^{19}\text{F}$  NMR (376 MHz,  $\text{CDCl}_3$ ):  $\delta$  = -83.54 (t,  $J$  = 3.4 Hz, 3F), -114.29 (q,  $J$  = 3.4 Hz, 2F) ppm.

$^{13}\text{C}$  NMR (100 MHz,  $\text{CDCl}_3$ ):  $\delta$  = 152.6, 151.0 (m), 141.5 (t,  $J_{\text{C-F}}$  = 31.9 Hz), 133.0, 131.6, 128.5, 127.1, 126.9, 125.5, 125.3, 123.5 (t,  $J_{\text{C-F}}$  = 1.3 Hz), 120.9, 120.4, 119.3, 118.4, 109.5 (m), 98.3 (t,  $J_{\text{C-F}}$  = 1.4 Hz), 75.7 (t,  $J_{\text{C-F}}$  = 1.3 Hz), 34.9, 31.1 ppm; carbons corresponding to the  $\text{C}_2\text{F}_5$  group cannot be identified due to C-F coupling.

HRMS (m/z): calcd for  $\text{C}_{26}\text{H}_{20}\text{F}_5\text{O}$   $[\text{M}+\text{H}]^+$  443.1429, found: 443.1427.

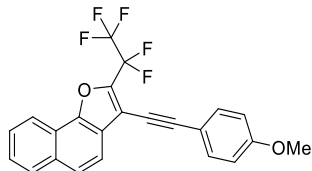

**3-((4-Methoxyphenyl)ethynyl)-2-(perfluoroethyl)naphtho[1,2-*b*]furan (3ae):**

Yield = 69% (86 mg). Light yellow solid. M.p. 138.0-139.8 °C.

IR (KBr):  $\nu$  = 3010, 2224, 1596, 1250, 834, 750  $\text{cm}^{-1}$ .

$^1\text{H}$  NMR (400 MHz,  $\text{CDCl}_3$ ):  $\delta$  = 8.32 (d,  $J$  = 8.0 Hz, 1H), 7.95 (d,  $J$  = 7.9 Hz, 1H), 7.82 – 7.74 (m, 2H), 7.64 (ddd,  $J$  = 8.2, 7.1, 1.2 Hz, 1H), 7.61 – 7.51 (m, 3H), 6.94 – 6.88 (m, 2H), 3.83 (s, 3H) ppm.

$^{19}\text{F}$  NMR (376 MHz,  $\text{CDCl}_3$ ):  $\delta$  = -83.56 (t,  $J$  = 4.1 Hz, 3F), -114.27 (q,  $J$  = 4.1 Hz, 2F) ppm.

$^{13}\text{C}$  NMR (100 MHz,  $\text{CDCl}_3$ ):  $\delta$  = 160.3, 151.0 (t,  $J_{\text{C-F}}$  = 1.3 Hz), 141.2 (t,  $J_{\text{C-F}}$  = 31.6 Hz), 133.4, 133.0, 128.5, 127.1, 126.9, 125.2, 123.5 (t,  $J_{\text{C-F}}$  = 1.2 Hz), 120.9, 120.4, 118.4, 114.4, 114.1, 109.6 (m), 98.3 (t,  $J_{\text{C-F}}$  = 1.4 Hz), 75.1 (t,  $J_{\text{C-F}}$  = 1.3 Hz), 55.3 ppm; carbons corresponding to the  $\text{C}_2\text{F}_5$  group cannot be identified due to C-F coupling.

HRMS (m/z): calcd for  $\text{C}_{23}\text{H}_{14}\text{F}_5\text{O}_2$   $[\text{M}+\text{H}]^+$  417.0908, found: 417.0906.

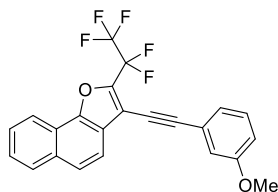

**3-((3-Methoxyphenyl)ethynyl)-2-(perfluoroethyl)naphtho[1,2-*b*]furan (3af):**

Yield = 57% (71 mg). Light yellow solid. M.p. 95.9-96.1 °C.

**IR** (KBr):  $\nu = 3005, 2229, 1597, 1220, 815, 755 \text{ cm}^{-1}$ .

**<sup>1</sup>H NMR** (400 MHz, CDCl<sub>3</sub>):  $\delta = 8.34 - 8.25$  (m, 1H), 7.97 – 7.89 (m, 1H), 7.76 (s, 2H), 7.67 – 7.53 (m, 2H), 7.29 (t,  $J = 7.9$  Hz, 1H), 7.23 – 7.17 (m, 1H), 7.11 (dd,  $J = 2.4, 1.3$  Hz, 1H), 6.94 (ddd,  $J = 8.3, 2.6, 0.9$  Hz, 1H), 3.83 (s, 3H) ppm.

**<sup>19</sup>F NMR** (376 MHz, CDCl<sub>3</sub>):  $\delta = -83.53$  (t,  $J = 3.0$  Hz, 3F), -114.28 (q,  $J = 3.0$  Hz, 2F) ppm.

**<sup>13</sup>C NMR** (100 MHz, CDCl<sub>3</sub>):  $\delta = 159.4, 151.0$  (t,  $J_{\text{C-F}} = 1.3$  Hz), 141.7 (t,  $J_{\text{C-F}} = 31.2$  Hz), 133.0, 129.6, 128.5, 127.2, 126.9, 125.3, 124.4, 123.4 (t,  $J_{\text{C-F}} = 1.2$  Hz), 123.3, 120.9, 120.3, 118.3, 116.6, 115.6, 109.3 (m), 98.0 (t,  $J_{\text{C-F}} = 1.6$  Hz), 76.1 (t,  $J_{\text{C-F}} = 1.3$  Hz), 55.3 ppm; carbons corresponding to the C<sub>2</sub>F<sub>5</sub> group cannot be identified due to C-F coupling.

**HRMS** (m/z): calcd for C<sub>23</sub>H<sub>14</sub>F<sub>5</sub>O<sub>2</sub> [M+H]<sup>+</sup> 417.0908, found: 417.0904.

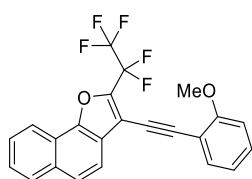

**3-((2-Methoxyphenyl)ethynyl)-2-(perfluoroethyl)naphtho[1,2-*b*]furan (3ag):**

Yield = 66% (83 mg). Light yellow solid. M.p. 75.3-75.8 °C.

**IR** (KBr):  $\nu = 2967, 2227, 1593, 1201, 806, 751 \text{ cm}^{-1}$ .

**<sup>1</sup>H NMR** (400 MHz, CDCl<sub>3</sub>):  $\delta = 8.32$  (d,  $J = 8.1$  Hz, 1H), 7.95 (d,  $J = 8.1$  Hz, 1H), 7.83 (d,  $J = 8.6$  Hz, 1H), 7.77 (d,  $J = 8.6$  Hz, 1H), 7.67 – 7.61 (m, 1H), 7.60 – 7.52 (m, 2H), 7.39 – 7.31 (m, 1H), 7.02 – 6.88 (m, 2H), 3.95 (s, 3H) ppm.

**<sup>19</sup>F NMR** (376 MHz, CDCl<sub>3</sub>):  $\delta = -83.53$  (t,  $J = 3.3$  Hz, 3F), -114.26 (q,  $J = 3.3$  Hz, 2F) ppm.

**<sup>13</sup>C NMR** (100 MHz, CDCl<sub>3</sub>):  $\delta = 160.4, 151.0$  (t,  $J_{\text{C-F}} = 1.3$  Hz), 141.3 (t,  $J_{\text{C-F}} = 30.2$  Hz), 133.5, 133.0, 130.7, 128.5, 127.1, 126.8, 125.2, 123.7 (t,  $J_{\text{C-F}} = 1.3$  Hz), 120.9, 120.5, 120.4, 118.6, 111.7, 110.8, 109.8 (m), 94.8 (t,  $J_{\text{C-F}} = 1.4$  Hz), 80.3 (t,  $J_{\text{C-F}} = 1.3$  Hz), 55.9 ppm; carbons corresponding to the C<sub>2</sub>F<sub>5</sub> group cannot be identified due to C-F coupling.

**HRMS** (m/z): calcd for C<sub>23</sub>H<sub>14</sub>F<sub>5</sub>O<sub>2</sub> [M+H]<sup>+</sup> 417.0908, found: 417.0907.

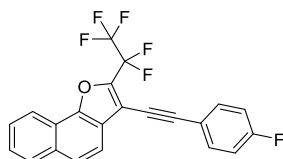

**3-((4-Fluorophenyl)ethynyl)-2-(perfluoroethyl)naphtho[1,2-*b*]furan (3ah):**

Yield = 56% (68 mg). Light yellow solid. M.p. 141.6-143.2 °C.

**IR** (KBr):  $\nu = 3067, 2226, 1616, 1200, 811, 747 \text{ cm}^{-1}$ .

**<sup>1</sup>H NMR** (400 MHz, CDCl<sub>3</sub>):  $\delta = 8.34 - 8.28$  (m, 1H), 7.95 (d,  $J = 7.9$  Hz, 1H), 7.77 (d,  $J = 2.1$  Hz, 2H), 7.64 (ddd,  $J = 8.2, 7.0, 1.2$  Hz, 1H), 7.61 – 7.55 (m, 3H), 7.11 – 7.04 (m, 2H) ppm.

**<sup>19</sup>F NMR** (376 MHz, CDCl<sub>3</sub>):  $\delta = -83.58$  (t,  $J = 4.0$  Hz, 3F), -109.19 – -109.26 (m, 1F), -114.35 (q,  $J = 4.0$  Hz, 2F) ppm.

**<sup>13</sup>C NMR** (100 MHz, CDCl<sub>3</sub>):  $\delta = 163.0$  (d,  $J_{\text{C-F}} = 249.7$  Hz), 151.0, 141.7 (t,  $J_{\text{C-F}} = 30.5$  Hz), 133.8 (d,  $J_{\text{C-F}} = 8.5$  Hz), 133.0, 128.5, 127.2, 127.0, 125.4, 123.4 (t,  $J_{\text{C-F}} = 30.5$  Hz), 120.9, 120.4, 118.4 (d,  $J_{\text{C-F}} = 3.5$  Hz), 118.2, 115.8 (d,  $J_{\text{C-F}} = 22.1$  Hz), 110.0 – 109.2 (m), 97.0 (t,  $J_{\text{C-F}} = 1.2$  Hz), 76.1 (q,  $J_{\text{C-F}} = 1.3$  Hz) ppm; carbons corresponding to



the C<sub>2</sub>F<sub>5</sub> group cannot be identified due to C-F coupling.

**HRMS** (m/z): calcd for C<sub>22</sub>H<sub>11</sub>F<sub>6</sub>O [M+H]<sup>+</sup> 405.0709, found: 405.0713.

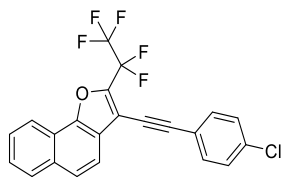

**3-((4-Chlorophenyl)ethynyl)-2-(perfluoroethyl)naphtho[1,2-*b*]furan (3ai):**

Yield = 49% (62 mg); 53% (67 mg). Light yellow solid. M.p. 167.4-168.5 °C.

**IR** (KBr):  $\nu$  = 3061, 2227, 1607, 1091, 824, 745 cm<sup>-1</sup>.

**<sup>1</sup>H NMR** (400 MHz, CDCl<sub>3</sub>):  $\delta$  = 8.35 – 8.28 (m, 1H), 7.95 (d,  $J$  = 7.7 Hz, 1H), 7.81 – 7.73 (m, 2H), 7.67 – 7.62 (m, 1H), 7.61 – 7.56 (m, 1H), 7.54 – 7.48 (m, 2H), 7.38 – 7.32 (m, 2H) ppm.

**<sup>19</sup>F NMR** (376 MHz, CDCl<sub>3</sub>):  $\delta$  = -83.56 (t,  $J$  = 4.1 Hz, 3F), -114.36 (q,  $J$  = 4.1 Hz, 2F) ppm.

**<sup>13</sup>C NMR** (100 MHz, CDCl<sub>3</sub>):  $\delta$  = 151.0 (t,  $J_{C-F}$  = 1.3 Hz), 141.8 (t,  $J_{C-F}$  = 31.8 Hz), 135.3, 133.0, 128.8, 128.5, 127.2, 127.0, 125.4, 123.3 (t,  $J_{C-F}$  = 1.3 Hz), 120.9, 120.8, 120.4, 120.2, 118.2, 109.0 (m), 96.8 (t,  $J_{C-F}$  = 1.7 Hz), 77.3 (t,  $J_{C-F}$  = 1.3 Hz) ppm; carbons corresponding to the C<sub>2</sub>F<sub>5</sub> group cannot be identified due to C-F coupling.

**HRMS** (m/z): calcd for C<sub>22</sub>H<sub>11</sub>ClF<sub>5</sub>O [M+H]<sup>+</sup> 421.0413, found: 421.0413.

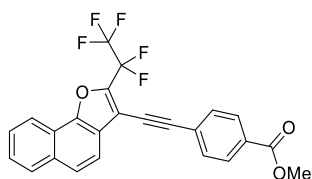

**Methyl 4-((2-(perfluoroethyl)naphtho[1,2-*b*]furan-3-yl)ethynyl)benzoate (3aj):**

Yield = 57% (76 mg). Light yellow solid. M.p. 156.9-157.6 °C.

**IR** (KBr):  $\nu$  = 2953, 2221, 1582, 1214, 812, 757 cm<sup>-1</sup>.

**<sup>1</sup>H NMR** (400 MHz, CDCl<sub>3</sub>):  $\delta$  = 8.33 – 8.25 (m, 1H), 8.03 (d,  $J$  = 7.8 Hz, 2H), 7.98 – 7.90 (m, 1H), 7.82 – 7.71 (m, 2H), 7.66 – 7.55 (m, 4H), 3.93 (s, 3H) ppm.

**<sup>19</sup>F NMR** (376 MHz, CDCl<sub>3</sub>):  $\delta$  = -83.55 (t,  $J$  = 3.1 Hz, 3F), -114.35 (t,  $J$  = 3.1 Hz, 2F) ppm.

**<sup>13</sup>C NMR** (100 MHz, CDCl<sub>3</sub>):  $\delta$  = 166.3, 151.1, 142.1 (t,  $J_{C-F}$  = 32.2 Hz), 133.0, 131.7, 130.3, 129.6, 128.5, 127.2, 127.0, 126.8, 125.5, 123.2, 120.8, 120.3, 118.1, 108.8 (m), 97.1, 79.0, 52.3 ppm; carbons corresponding to the C<sub>2</sub>F<sub>5</sub> group cannot be identified due to C-F coupling.

**HRMS** (m/z): calcd for C<sub>24</sub>H<sub>14</sub>F<sub>5</sub>O<sub>3</sub> [M+H]<sup>+</sup> 445.0858, found: 445.0855.

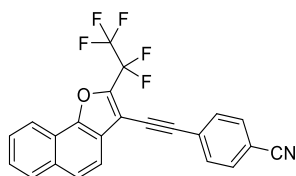

**4-((2-(Perfluoroethyl)naphtho[1,2-*b*]furan-3-yl)ethynyl)benzonitrile (3ak):**

Yield = 39% (48 mg); 45% (55 mg). Light yellow solid. M.p. 179.7-180.1 °C.

**IR** (KBr):  $\nu$  = 2971, 2227, 1608, 813, 747 cm<sup>-1</sup>.

**<sup>1</sup>H NMR** (400 MHz, CDCl<sub>3</sub>):  $\delta$  = 8.33 (d,  $J$  = 8.1 Hz, 1H), 7.98 (d,  $J$  = 7.9 Hz, 1H), 7.84 – 7.73 (m, 2H), 7.70 – 7.59

(m, 6H) ppm.

$^{19}\text{F}$  NMR (376 MHz,  $\text{CDCl}_3$ ):  $\delta = -83.55$  (t,  $J = 3.4$  Hz, 3F),  $-114.41$  (q,  $J = 3.4$  Hz, 2F) ppm.

$^{13}\text{C}$  NMR (100 MHz,  $\text{CDCl}_3$ ):  $\delta = 151.1$ ,  $142.5$  (t,  $J_{\text{C-F}} = 30.2$  Hz),  $133.0$ ,  $132.2$ ,  $132.1$ ,  $128.5$ ,  $127.4$ ,  $127.2$ ,  $127.0$ ,  $125.7$ ,  $123.1$  (t,  $J_{\text{C-F}} = 0.8$  Hz),  $120.9$ ,  $120.4$ ,  $118.3$ ,  $118.0$ ,  $112.4$ ,  $108.4$  (m),  $95.9$  (t,  $J_{\text{C-F}} = 1.4$  Hz),  $80.5$  (t,  $J_{\text{C-F}} = 0.8$  Hz) ppm; carbons corresponding to the  $\text{C}_2\text{F}_5$  group cannot be identified due to C-F coupling.

HRMS (m/z): calcd for  $\text{C}_{23}\text{H}_{11}\text{F}_5\text{NO}$   $[\text{M}+\text{H}]^+$  412.0755, found: 412.0755.

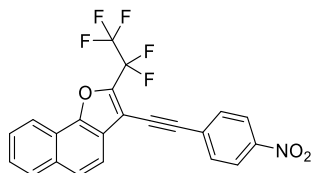

**3-((4-Nitrophenyl)ethynyl)-2-(perfluoroethyl)naphtho[1,2-*b*]furan (3al):**

Yield = 33% (42 mg); 43% (55 mg). Yellow solid. M.p. 199.4-200.8 °C.

IR (KBr):  $\nu = 2964$ ,  $2227$ ,  $1617$ ,  $1519$ ,  $811$ ,  $748$   $\text{cm}^{-1}$ .

$^1\text{H}$  NMR (400 MHz,  $\text{CDCl}_3$ ):  $\delta = 8.36 - 8.30$  (m, 1H),  $8.24 - 8.22$  (m, 2H),  $7.99$  (d,  $J = 7.9$  Hz, 1H),  $7.83$  (d,  $J = 8.6$  Hz, 1H),  $7.78$  (s, 1H),  $7.72 - 7.69$  (m, 2H),  $7.69 - 7.60$  (m, 2H) ppm.

$^{19}\text{F}$  NMR (376 MHz,  $\text{CDCl}_3$ ):  $\delta = -83.53$  (t,  $J = 3.5$  Hz, 3F),  $-114.40$  (q,  $J = 3.5$  Hz, 2F) ppm.

$^{13}\text{C}$  NMR (100 MHz,  $\text{CDCl}_3$ ):  $\delta = 151.2$  (t,  $J_{\text{C-F}} = 1.2$  Hz),  $147.5$ ,  $142.6$  (t,  $J = 30.4$  Hz),  $133.0$ ,  $132.5$ ,  $128.9$ ,  $128.5$ ,  $127.4$ ,  $127.2$ ,  $125.7$ ,  $123.7$ ,  $123.0$  (t,  $J_{\text{C-F}} = 1.0$  Hz),  $120.8$ ,  $120.3$ ,  $117.9$ ,  $108.3$  (m),  $95.7$  (t,  $J = 1.6$  Hz),  $81.3$  (t,  $J = 1.2$  Hz) ppm; carbons corresponding to the  $\text{C}_2\text{F}_5$  group cannot be identified due to C-F coupling.

HRMS (m/z): calcd for  $\text{C}_{22}\text{H}_{11}\text{F}_5\text{NO}_2$   $[\text{M}+\text{H}]^+$  432.0654, found: 432.0661.

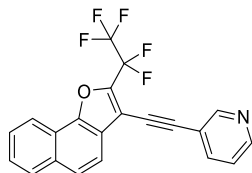

**3-((2-(Perfluoroethyl)naphtho[1,2-*b*]furan-3-yl)ethynyl)pyridine (3am):**

Yield = 45% (52 mg). Light yellow solid. M.p. 128.7-129.3 °C.

IR (KBr):  $\nu = 3036$ ,  $2206$ ,  $1615$ ,  $1577$ ,  $802$ ,  $759$   $\text{cm}^{-1}$ .

$^1\text{H}$  NMR (400 MHz,  $\text{CDCl}_3$ ):  $\delta = 8.85$  (s, 1H),  $8.62$  (d,  $J = 3.7$  Hz, 1H),  $8.34$  (d,  $J = 8.0$  Hz, 1H),  $7.98$  (d,  $J = 8.0$  Hz, 1H),  $7.89$  (dt,  $J = 7.9$ ,  $1.8$  Hz, 1H),  $7.85 - 7.76$  (m, 2H),  $7.71 - 7.58$  (m, 2H),  $7.34$  (dd,  $J = 7.7$ ,  $5.0$  Hz, 1H) ppm.

$^{19}\text{F}$  NMR (376 MHz,  $\text{CDCl}_3$ ):  $\delta = -83.56$  (t,  $J = 3.7$  Hz, 3F),  $-114.38$  (q,  $J = 3.7$  Hz, 2F) ppm.

$^{13}\text{C}$  NMR (100 MHz,  $\text{CDCl}_3$ ):  $\delta = 152.3$ ,  $151.1$  (t,  $J_{\text{C-F}} = 1.2$  Hz),  $149.4$ ,  $142.2$  (t,  $J_{\text{C-F}} = 30.7$  Hz),  $138.7$ ,  $133.0$ ,  $128.5$ ,  $127.3$ ,  $127.1$ ,  $125.6$ ,  $123.2$  (t,  $J_{\text{C-F}} = 1.2$  Hz),  $123.1$  (t,  $J_{\text{C-F}} = 1.2$  Hz),  $120.9$ ,  $120.4$ ,  $119.5$  (m),  $118.1$ ,  $108.6$  (m),  $94.5$  (t,  $J_{\text{C-F}} = 1.4$  Hz),  $79.6$  (t,  $J_{\text{C-F}} = 1.0$  Hz) ppm; carbons corresponding to the  $\text{C}_2\text{F}_5$  group cannot be identified due to C-F coupling.

HRMS (m/z): calcd for  $\text{C}_{21}\text{H}_{11}\text{F}_5\text{NO}$   $[\text{M}+\text{H}]^+$  388.0755, found: 388.0757.

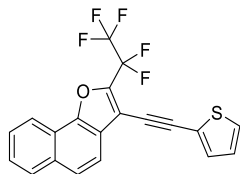

**2-(Perfluoroethyl)-3-(thiophen-2-ylethynyl)naphtho[1,2-*b*]furan (3an):**

Yield = 41% (48 mg); 49% (57 mg). Light yellow solid. M.p. 104.3-106.1 °C.

**IR** (KBr):  $\nu = 2962, 2213, 1617, 1512, 811, 746 \text{ cm}^{-1}$ .

**<sup>1</sup>H NMR** (400 MHz, CDCl<sub>3</sub>):  $\delta = 8.36 - 8.29$  (m, 1H),  $8.00 - 7.92$  (m, 1H),  $7.78$  (d,  $J = 1.2$  Hz, 2H),  $7.68 - 7.55$  (m, 2H),  $7.42 - 7.36$  (m, 2H),  $7.06$  (dd,  $J = 5.1, 3.6$  Hz, 1H) ppm.

**<sup>19</sup>F NMR** (376 MHz, CDCl<sub>3</sub>):  $\delta = -83.51$  (t,  $J = 3.3$  Hz, 3F),  $-114.28$  (q,  $J = 3.3$  Hz, 2F) ppm.

**<sup>13</sup>C NMR** (100 MHz, CDCl<sub>3</sub>):  $\delta = 151.0$  (d,  $J_{\text{C-F}} = 1.0$  Hz),  $141.6$  (t,  $J_{\text{C-F}} = 30.7$  Hz),  $133.1, 133.0, 128.5, 128.5, 127.3, 127.2, 127.0, 125.4, 123.3$  (t,  $J_{\text{C-F}} = 0.9$  Hz),  $122.1, 120.9, 120.4, 118.3, 109.1$  (m),  $91.2$  (t,  $J_{\text{C-F}} = 1.6$  Hz),  $80.0$  (t,  $J_{\text{C-F}} = 1.1$  Hz) ppm; carbons corresponding to the C<sub>2</sub>F<sub>5</sub> group cannot be identified due to C-F coupling.

**HRMS** (m/z): calcd for C<sub>20</sub>H<sub>10</sub>F<sub>5</sub>OS [M+H]<sup>+</sup> 393.0367, found: 393.0370.

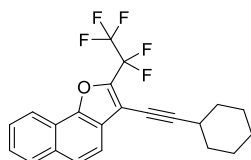

**3-(Cyclohexylethynyl)-2-(perfluoroethyl)naphtho[1,2-*b*]furan (3ao):**

Yield = 54% (64 mg). Light yellow solid. M.p. 130.1-130.3 °C.

**IR** (KBr):  $\nu = 2933, 2237, 1601, 810, 747 \text{ cm}^{-1}$ .

**<sup>1</sup>H NMR** (400 MHz, CDCl<sub>3</sub>):  $\delta = 8.35 - 8.26$  (m, 1H),  $7.94$  (d,  $J = 8.0$  Hz, 1H),  $7.77 - 7.68$  (m, 2H),  $7.65 - 7.54$  (m, 2H),  $2.77 - 2.71$  (m, 1H),  $1.95 - 1.90$  (m, 2H),  $1.83 - 1.77$  (m, 2H),  $1.69 - 1.53$  (m, 3H),  $1.47 - 1.37$  (m, 3H) ppm.

**<sup>19</sup>F NMR** (376 MHz, CDCl<sub>3</sub>):  $\delta = -83.69$  (t,  $J = 3.8$  Hz, 3F),  $-114.43$  (q,  $J = 3.8$  Hz, 2F) ppm.

**<sup>13</sup>C NMR** (100 MHz, CDCl<sub>3</sub>):  $\delta = 150.8$  (d,  $J_{\text{C-F}} = 1.0$  Hz),  $141.3$  (t,  $J_{\text{C-F}} = 30.2$  Hz),  $132.9, 128.4, 127.0, 126.7, 125.0, 123.9$  (t,  $J = 1.0$  Hz),  $120.9, 120.4, 118.5, 110.0$  (m),  $104.0$  (t,  $J_{\text{C-F}} = 1.3$  Hz),  $67.6$  (t,  $J_{\text{C-F}} = 1.0$  Hz),  $32.3, 29.9, 25.9, 24.6$  ppm; carbons corresponding to the C<sub>2</sub>F<sub>5</sub> group cannot be identified due to C-F coupling.

**HRMS** (m/z): calcd for C<sub>22</sub>H<sub>18</sub>F<sub>5</sub>O [M+H]<sup>+</sup> 393.1272, found: 393.1272.

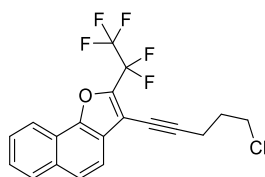

**3-(5-Chloropent-1-yn-1-yl)-2-(perfluoroethyl)naphtho[1,2-*b*]furan (3ap):**

Yield = 27% (32 mg); 33% (39 mg). Yellow solid. M.p. 57.0-57.6 °C.

**IR** (KBr):  $\nu = 2962, 2242, 1600, 811, 749 \text{ cm}^{-1}$ .

**<sup>1</sup>H NMR** (400 MHz, CDCl<sub>3</sub>):  $\delta = 8.32$  (d,  $J = 8.1$  Hz, 1H),  $7.96$  (d,  $J = 8.0$  Hz, 1H),  $7.80 - 7.68$  (m, 2H),  $7.67 - 7.56$  (m, 2H),  $3.77$  (t,  $J = 6.3$  Hz, 2H),  $2.75$  (t,  $J = 6.8$  Hz, 2H),  $2.17 - 2.10$  (m, 2H) ppm.

**<sup>19</sup>F NMR** (376 MHz, CDCl<sub>3</sub>):  $\delta = -83.70$  (t,  $J = 4.0$  Hz, 3F),  $-114.51$  (q,  $J = 4.0$  Hz, 2F) ppm.

**<sup>13</sup>C NMR** (100 MHz, CDCl<sub>3</sub>):  $\delta = 150.9$  (t,  $J_{\text{C-F}} = 1.1$  Hz),  $141.6$  (t,  $J_{\text{C-F}} = 29.7$  Hz),  $132.9, 128.5, 127.2, 126.9, 125.2, 123.7$  (t,  $J_{\text{C-F}} = 1.1$  Hz),  $120.9, 120.4, 118.3, 109.4$  (m),  $97.6$  (t,  $J_{\text{C-F}} = 1.4$  Hz),  $68.7$  (t,  $J_{\text{C-F}} = 1.1$  Hz),  $43.4,$

31.1, 17.1 ppm; carbons corresponding to the C<sub>2</sub>F<sub>5</sub> group cannot be identified due to C-F coupling.

**HRMS** (m/z): calcd for C<sub>19</sub>H<sub>13</sub>ClF<sub>5</sub>O [M+H]<sup>+</sup> 387.0570, found: 387.0571.

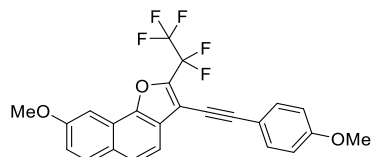

**8-Methoxy-3-((4-methoxyphenyl)ethynyl)-2-(perfluoroethyl)naphtho[1,2-b]furan (3be):**

Yield = 61% (54 mg). White solid. M.p. 159.0-160.3 °C.

**IR** (KBr):  $\nu = 2968, 2225, 1606, 1215, 835, 708 \text{ cm}^{-1}$ .

**<sup>1</sup>H NMR** (400 MHz, CDCl<sub>3</sub>):  $\delta = 7.87$  (d,  $J = 9.0$  Hz, 1H),  $7.72$  (d,  $J = 8.5$  Hz, 1H),  $7.65$  (d,  $J = 8.5$  Hz, 1H),  $7.60 - 7.51$  (m, 3H),  $7.23$  (dd,  $J = 8.9, 2.6$  Hz, 1H),  $6.95 - 6.89$  (m, 2H),  $4.02$  (s, 3H),  $3.85$  (s, 3H) ppm.

**<sup>19</sup>F NMR** (376 MHz, CDCl<sub>3</sub>):  $\delta = -83.57$  (t,  $J = 3.6$  Hz, 3F),  $-114.39$  (q,  $J = 3.6$  Hz, 2F) ppm.

**<sup>13</sup>C NMR** (100 MHz, CDCl<sub>3</sub>):  $\delta = 160.2, 158.7, 150.5$  (t,  $J_{C-F} = 1.1$  Hz),  $141.1$  (t,  $J_{C-F} = 31.6$  Hz),  $133.4, 130.1, 128.1, 124.9, 124.0$  (t,  $J_{C-F} = 1.2$  Hz),  $121.9, 119.2, 115.9, 114.4, 114.1, 109.7$  (m),  $99.0, 98.1$  (t,  $J_{C-F} = 1.3$  Hz),  $75.2$  (t,  $J_{C-F} = 1.1$  Hz),  $55.6, 55.4$  ppm; carbons corresponding to the C<sub>2</sub>F<sub>5</sub> group cannot be identified due to C-F coupling.

**HRMS** (m/z): calcd for C<sub>24</sub>H<sub>16</sub>F<sub>5</sub>O<sub>3</sub> [M+H]<sup>+</sup> 447.1014, found: 447.1013.

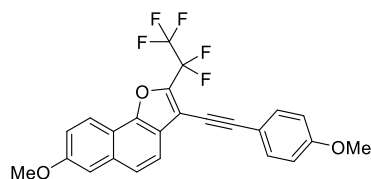

**7-Methoxy-3-((4-methoxyphenyl)ethynyl)-2-(perfluoroethyl)naphtho[1,2-b]furan (3ce):**

Yield = 66% (59 mg). Light yellow solid. M.p. 123.4-125.1 °C.

**IR** (KBr):  $\nu = 2967, 2223, 1615, 1199, 830, 767 \text{ cm}^{-1}$ .

**<sup>1</sup>H NMR** (400 MHz, CDCl<sub>3</sub>):  $\delta = 8.24$  (d,  $J = 8.6$  Hz, 1H),  $7.76$  (d,  $J = 8.6$  Hz, 1H),  $7.69$  (d,  $J = 8.6$  Hz, 1H),  $7.58 - 7.52$  (m, 2H),  $7.34 - 7.27$  (m, 2H),  $6.96 - 6.88$  (m, 2H),  $3.96$  (s, 3H),  $3.85$  (s, 3H) ppm.

**<sup>19</sup>F NMR** (376 MHz, CDCl<sub>3</sub>):  $\delta = -83.59$  (t,  $J = 3.5$  Hz, 3F),  $-114.20$  (q,  $J = 3.5$  Hz, 2F) ppm.

**<sup>13</sup>C NMR** (100 MHz, CDCl<sub>3</sub>):  $\delta = 160.2, 158.5, 151.3$  (t,  $J_{C-F} = 1.2$  Hz),  $140.6$  (t,  $J_{C-F} = 30.7$  Hz),  $134.6, 133.4, 124.3, 122.0, 121.9, 119.2, 119.1, 116.0, 114.5, 114.1, 109.6$  (m),  $107.4, 98.1, 75.3, 55.4, 55.4$  ppm; carbons corresponding to the C<sub>2</sub>F<sub>5</sub> group cannot be identified due to C-F coupling.

**HRMS** (m/z): calcd for C<sub>24</sub>H<sub>16</sub>F<sub>5</sub>O<sub>3</sub> [M+H]<sup>+</sup> 447.1014, found: 447.1017.

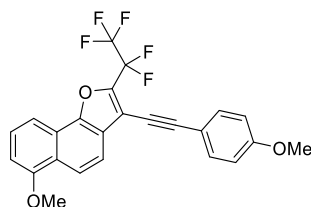

**6-Methoxy-3-((4-methoxyphenyl)ethynyl)-2-(perfluoroethyl)naphtho[1,2-b]furan (3de):**

Yield = 60% (53 mg). Yellow solid. M.p. 147.6-148.3 °C.

**IR** (KBr):  $\nu = 2965, 2228, 1596, 1196, 800, 756 \text{ cm}^{-1}$ .

**<sup>1</sup>H NMR** (400 MHz, CDCl<sub>3</sub>):  $\delta = 8.23$  (d,  $J = 8.9$  Hz, 1H),  $7.91$  (d,  $J = 8.3$  Hz, 1H),  $7.77$  (d,  $J = 8.9$  Hz, 1H),  $7.60 - 7.52$  (m, 3H),  $6.99 - 6.89$  (m, 3H),  $4.04$  (s, 3H),  $3.85$  (s, 3H) ppm.

<sup>19</sup>F NMR (376 MHz, CDCl<sub>3</sub>): δ = -83.57 (t, *J* = 3.7 Hz, 3F), -114.36 (q, *J* = 3.7 Hz, 2F) ppm.

<sup>13</sup>C NMR (100 MHz, CDCl<sub>3</sub>): δ = 160.2, 155.9, 150.9 (t, *J*<sub>C-F</sub> = 1.2 Hz), 141.3 (t, *J*<sub>C-F</sub> = 30.4 Hz), 133.4, 127.6, 124.6, 124.0, 121.9, 119.2, 117.5, 114.4, 114.1, 112.5, 109.6 (m), 105.4, 98.2 (t, *J*<sub>C-F</sub> = 1.4 Hz), 75.2 (t, *J*<sub>C-F</sub> = 1.1 Hz), 55.7, 55.4 ppm; carbons corresponding to the C<sub>2</sub>F<sub>5</sub> group cannot be identified due to C-F coupling.

HRMS (m/z): calcd for C<sub>24</sub>H<sub>16</sub>F<sub>5</sub>O<sub>3</sub> [M+H]<sup>+</sup> 447.1014, found: 447.1013.

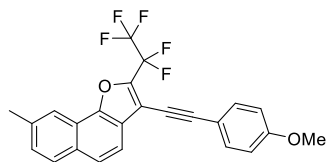

**3-((4-Methoxyphenyl)ethynyl)-8-methyl-2-(perfluoroethyl)naphtho[1,2-*b*]furan (3ee):**

Yield = 63% (54 mg). Yellow solid. M.p. 138.4-139.8 °C.

IR (KBr): ν = 3005, 2217, 1603, 1206, 810, 729 cm<sup>-1</sup>.

<sup>1</sup>H NMR (400 MHz, CDCl<sub>3</sub>): δ = 8.11 (s, 1H), 7.86 (d, *J* = 8.4 Hz, 1H), 7.79 – 7.68 (m, 2H), 7.56 (d, *J* = 8.8 Hz, 2H), 7.47 – 7.39 (m, 1H), 6.93 (d, *J* = 8.8 Hz, 2H), 3.86 (s, 3H), 2.60 (s, 3H) ppm.

<sup>19</sup>F NMR (376 MHz, CDCl<sub>3</sub>): δ = -83.57 (t, *J* = 3.4 Hz, 3F), -114.29 (q, *J* = 3.4 Hz, 2F) ppm.

<sup>13</sup>C NMR (100 MHz, CDCl<sub>3</sub>): δ = 160.2, 150.7 (d, *J*<sub>C-F</sub> = 1.3 Hz), 141.1 (t, *J*<sub>C-F</sub> = 30.5 Hz), 137.3, 133.4, 131.2, 129.0, 128.3, 125.0, 123.6, 121.0, 119.5, 117.4, 114.4, 114.1, 109.6 (m), 98.1 (t, *J*<sub>C-F</sub> = 1.3 Hz), 75.2 (t, *J*<sub>C-F</sub> = 0.8 Hz), 55.3, 21.8 ppm; carbons corresponding to the C<sub>2</sub>F<sub>5</sub> group cannot be identified due to C-F coupling.

HRMS (m/z): calcd for C<sub>24</sub>H<sub>16</sub>F<sub>5</sub>O<sub>2</sub> [M+H]<sup>+</sup> 431.1065, found: 431.1070.

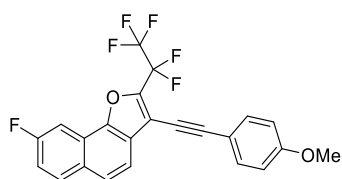

**8-Fluoro-3-((4-methoxyphenyl)ethynyl)-2-(perfluoroethyl)naphtho[1,2-*b*]furan (3fe):**

Yield = 54% (47 mg). Yellow solid. M.p. 158.6-159.1 °C.

IR (KBr): ν = 2936, 2222, 1603, 1200, 832, 731 cm<sup>-1</sup>.

<sup>1</sup>H NMR (400 MHz, CDCl<sub>3</sub>): δ = 7.98 – 7.90 (m, 2H), 7.83 – 7.69 (m, 2H), 7.54 (d, *J* = 8.7 Hz, 2H), 7.35 (td, *J* = 8.8, 2.4 Hz, 1H), 6.92 (d, *J* = 8.7 Hz, 2H), 3.85 (s, 3H) ppm.

<sup>19</sup>F NMR (376 MHz, CDCl<sub>3</sub>): δ = -83.57 (t, *J* = 3.0 Hz, 3F), -111.15 – -111.21 (m, 1F), -114.45 (q, *J* = 3.0 Hz, 2F) ppm.

<sup>13</sup>C NMR (100 MHz, CDCl<sub>3</sub>): δ = 161.4 (d, *J*<sub>C-F</sub> = 247.5 Hz), 160.3, 150.5 (m), 141.6 (t, *J*<sub>C-F</sub> = 31.8 Hz), 133.4, 131.1 (d, *J*<sub>C-F</sub> = 9.0 Hz), 129.8, 125.0, 124.3, 121.7 (d, *J*<sub>C-F</sub> = 10.0 Hz), 117.7, 116.8 (d, *J*<sub>C-F</sub> = 24.5 Hz), 114.2, 114.1, 109.7 (m), 104.8 (d, *J*<sub>C-F</sub> = 23.2 Hz), 98.5, 74.8, 55.4 ppm; carbons corresponding to the C<sub>2</sub>F<sub>5</sub> group cannot be identified due to C-F coupling.

HRMS (m/z): calcd for C<sub>23</sub>H<sub>13</sub>F<sub>6</sub>O<sub>2</sub> [M+H]<sup>+</sup> 435.0814, found: 435.0815.

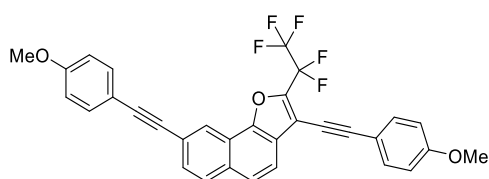

**3,8-Bis((4-methoxyphenyl)ethynyl)-2-(perfluoroethyl)naphtho[1,2-*b*]furan (3ge):**

Yield = 39% (32 mg); 61% (50 mg). Yellow solid. M.p. 185.3-186.7 °C.

**IR** (KBr):  $\nu = 2962, 2218, 1599, 1213, 832, 765 \text{ cm}^{-1}$ .

**<sup>1</sup>H NMR** (400 MHz, CDCl<sub>3</sub>):  $\delta = 8.53 - 8.47$  (m, 1H), 7.94 (d,  $J = 8.6$  Hz, 1H), 7.84 – 7.74 (m, 2H), 7.69 (dd,  $J = 8.5, 1.6$  Hz, 1H), 7.59 – 7.51 (m, 4H), 6.96 – 6.88 (m, 4H), 3.87 – 3.85 (m, 6H) ppm.

**<sup>19</sup>F NMR** (376 MHz, CDCl<sub>3</sub>):  $\delta = -83.56$  (t,  $J = 3.2$  Hz, 3F),  $-114.44$  (q,  $J = 3.2$  Hz, 2F) ppm.

**<sup>13</sup>C NMR** (100 MHz, CDCl<sub>3</sub>):  $\delta = 160.3, 159.8, 150.4$  (t,  $J_{\text{C-F}} = 1.2$  Hz), 141.8 (t,  $J_{\text{C-F}} = 32.8$  Hz), 133.4, 133.2, 131.9, 129.5, 128.5, 125.0, 124.1 (t,  $J_{\text{C-F}} = 0.9$  Hz), 123.3, 122.5, 120.7, 119.0, 115.0, 114.3, 114.1, 114.1, 109.8 (m), 98.4 (t,  $J_{\text{C-F}} = 1.3$  Hz), 91.1, 88.0, 74.9 (t,  $J_{\text{C-F}} = 1.1$  Hz), 55.4, 55.3 ppm; carbons corresponding to the C<sub>2</sub>F<sub>5</sub> group cannot be identified due to C-F coupling.

**HRMS** (m/z): calcd for C<sub>32</sub>H<sub>20</sub>F<sub>5</sub>O<sub>3</sub> [M+H]<sup>+</sup> 547.1327, found: 547.1329.

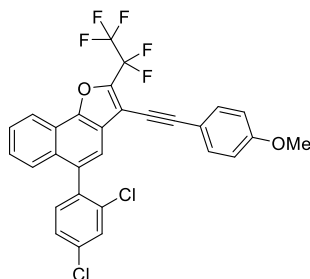**5-(2,4-Dichlorophenyl)-3-((4-methoxyphenyl)ethynyl)-2-(perfluoroethyl)naphtho[1,2-*b*]furan (3he):**

Yield = 28% (32 mg); 30% (34 mg). Light yellow solid. M.p. 162.4-163.8 °C.

**IR** (KBr):  $\nu = 2967, 2224, 1594, 1214, 823, 762 \text{ cm}^{-1}$ .

**<sup>1</sup>H NMR** (400 MHz, CDCl<sub>3</sub>):  $\delta = 8.42$  (d,  $J = 7.9$  Hz, 1H), 7.85 (d,  $J = 8.5$  Hz, 1H), 7.73 – 7.66 (m, 2H), 7.63 – 7.50 (m, 5H), 7.35 (dd,  $J = 8.2, 2.0$  Hz, 1H), 6.93 – 6.86 (m, 2H), 3.84 (s, 3H) ppm.

**<sup>19</sup>F NMR** (376 MHz, CDCl<sub>3</sub>):  $\delta = -83.55$  (t,  $J = 3.2$  Hz, 3F),  $-114.39$  (q,  $J = 3.2$  Hz, 2F) ppm.

**<sup>13</sup>C NMR** (100 MHz, CDCl<sub>3</sub>):  $\delta = 160.3, 150.8$  (t,  $J_{\text{C-F}} = 1.4$  Hz), 141.6 (t,  $J_{\text{C-F}} = 31.8$  Hz), 140.2, 135.3, 133.4, 132.6, 132.0, 131.9, 131.1, 130.3, 129.6, 127.4, 127.3, 126.6, 122.8 (t,  $J_{\text{C-F}} = 1.3$  Hz), 121.1, 120.8, 119.4, 114.1, 114.1, 109.7 (m), 98.6 (t,  $J_{\text{C-F}} = 1.3$  Hz), 74.8 (t,  $J_{\text{C-F}} = 1.1$  Hz), 55.3 ppm; carbons corresponding to the C<sub>2</sub>F<sub>5</sub> group cannot be identified due to C-F coupling.

**HRMS** (m/z): calcd for C<sub>29</sub>H<sub>16</sub>Cl<sub>2</sub>F<sub>5</sub>O<sub>2</sub> [M+H]<sup>+</sup> 561.0442, found: 561.0436.

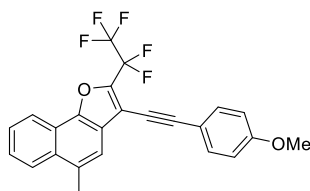**3-((4-Methoxyphenyl)ethynyl)-5-methyl-2-(perfluoroethyl)naphtho[1,2-*b*]furan (3ie):**

Yield = 34% (29 mg); 35% (30 mg). Yellow solid. M.p. 137.8-139.6 °C.

**IR** (KBr):  $\nu = 2918, 2222, 1612, 1217, 830, 756 \text{ cm}^{-1}$ .

**<sup>1</sup>H NMR** (400 MHz, CDCl<sub>3</sub>):  $\delta = 8.38 - 8.32$  (m, 1H), 8.11 – 8.04 (m, 1H), 7.69 – 7.60 (m, 3H), 7.58 – 7.53 (m, 2H), 6.96 – 6.89 (m, 2H), 3.85 (s, 3H), 2.77 (d,  $J = 1.1$  Hz, 3H) ppm.

**<sup>19</sup>F NMR** (376 MHz, CDCl<sub>3</sub>):  $\delta = -83.59$  (t,  $J = 3.8$  Hz, 3F),  $-114.22$  (q,  $J = 3.8$  Hz, 2F) ppm.

**<sup>13</sup>C NMR** (100 MHz, CDCl<sub>3</sub>):  $\delta = 160.2, 150.2$  (t,  $J_{\text{C-F}} = 1.4$  Hz), 141.0 (t,  $J_{\text{C-F}} = 31.8$  Hz), 133.4, 132.2, 131.6, 128.3, 126.8, 126.7, 125.1, 123.0 (t,  $J_{\text{C-F}} = 0.9$  Hz), 121.0, 120.9, 118.3, 114.5, 114.1, 98.0 (t,  $J_{\text{C-F}} = 1.4$  Hz), 75.3 (t,

$J_{C-F} = 1.2$  Hz), 55.4, 19.8 ppm; carbons corresponding to the  $C_2F_5$  group cannot be identified due to C-F coupling.

**HRMS** (m/z): calcd for  $C_{24}H_{16}F_5O_2$   $[M+H]^+$  431.1065, found: 431.1064.

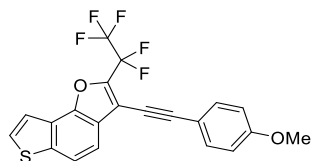

**3-((4-Methoxyphenyl)ethynyl)-2-(perfluoroethyl)thieno[2,3-g]benzofuran (3je):**

Yield = 58% (47 mg). White solid. M.p. 135.8-136.9 °C.

**IR** (KBr):  $\nu = 2971, 2220, 1615, 1508, 1219, 828, 718$   $cm^{-1}$ .

**$^1H$  NMR** (400 MHz,  $CDCl_3$ ):  $\delta = 7.86$  (dd,  $J = 8.5, 0.6$  Hz, 1H), 7.76 – 7.69 (m, 2H), 7.61 (d,  $J = 5.5$  Hz, 1H), 7.57 – 7.51 (m, 2H), 6.95 – 6.88 (m, 2H), 3.85 (s, 3H) ppm.

**$^{19}F$  NMR** (376 MHz,  $CDCl_3$ ):  $\delta = -83.59$  (t,  $J = 4.2$  Hz, 3F), -114.46 (q,  $J = 4.2$  Hz, 2F) ppm.

**$^{13}C$  NMR** (100 MHz,  $CDCl_3$ ):  $\delta = 160.3, 149.5$  (t,  $J_{C-F} = 1.0$  Hz), 140.6, 140.6 (t,  $J_{C-F} = 30.2$  Hz), 133.4, 128.0, 125.3 (t,  $J_{C-F} = 0.9$  Hz), 123.6, 119.0, 118.9, 117.1, 114.4, 114.1, 109.5 (m), 98.4 (t,  $J_{C-F} = 1.5$  Hz), 75.1 (t,  $J_{C-F} = 0.9$  Hz), 55.3 ppm; carbons corresponding to the  $C_2F_5$  group cannot be identified due to C-F coupling.

**HRMS** (m/z): calcd for  $C_{21}H_{12}F_5O_2S$   $[M+H]^+$  423.0473, found: 423.0474.

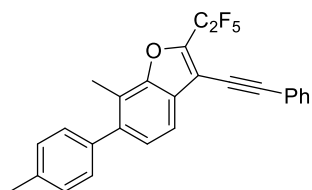

**7-Methyl-2-(perfluoroethyl)-3-(phenylethynyl)-6-(p-tolyl)benzofuran (3ke):**

Yield = 14% (12 mg). White solid. M.p. 62.7-63.9 °C.

**IR** (KBr):  $\nu = 3026, 2228, 1586, 1208, 806, 758$   $cm^{-1}$ .

**$^1H$  NMR** (400 MHz,  $CDCl_3$ ):  $\delta = 7.67$  (d,  $J = 8.1$  Hz, 1H), 7.63 – 7.58 (m, 2H), 7.56 – 7.50 (m, 2H), 7.42 – 7.38 (m, 3H), 7.37 – 7.32 (m, 3H), 2.47 (s, 3H), 2.43 (s, 3H) ppm.

**$^{19}F$  NMR** (376 MHz,  $CDCl_3$ ):  $\delta = -83.58$  (t,  $J = 2.9$  Hz, 3F), -114.96 (q,  $J = 2.9$  Hz, 2F) ppm.

**$^{13}C$  NMR** (100 MHz,  $CDCl_3$ ):  $\delta = 154.4, 142.5$  (t,  $J_{C-F} = 30.2$  Hz), 141.5, 137.2 (d,  $J_{C-F} = 38.6$  Hz), 132.5, 131.8, 129.4, 129.1 (d,  $J_{C-F} = 13.8$  Hz), 129.0, 128.4 (d,  $J_{C-F} = 12.4$  Hz), 126.8, 125.8 (t,  $J_{C-F} = 1.2$  Hz), 122.4, 121.0 (d,  $J_{C-F} = 47.3$  Hz), 118.2, 108.5 (m), 81.5, 73.9, 21.2, 12.7 ppm; carbons corresponding to the  $C_8F_{17}$  group cannot be identified due to C-F coupling.

**HRMS** (m/z): calcd for  $C_{26}H_{18}F_5O$   $[M+H]^+$  441.1272, found: 441.1279.

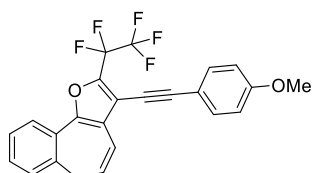

**3-((4-Methoxyphenyl)ethynyl)-2-(perfluoroethyl)-6H-benzo[6,7]cyclohepta[1,2-b]furan (3le):**

Yield = 26% (25 mg). White solid. M.p. 66.8-67.5 °C.

**IR** (KBr):  $\nu = 2958, 2222, 1595, 1226, 834, 767$   $cm^{-1}$ .

**$^1H$  NMR** (400 MHz,  $CDCl_3$ ):  $\delta = 7.75$  (d,  $J = 7.7$  Hz, 1H), 7.49 (d,  $J = 8.4$  Hz, 2H), 7.44 (d,  $J = 7.4$  Hz, 1H), 7.37

(t,  $J = 7.5$  Hz, 1H), 7.28 (d,  $J = 7.7$  Hz, 1H), 6.89 (d,  $J = 8.4$  Hz, 2H), 6.63 (d,  $J = 9.8$  Hz, 1H), 5.99 – 5.86 (m, 1H), 3.84 (s, 3H), 3.24 (d,  $J = 6.7$  Hz, 2H) ppm.

$^{19}\text{F}$  NMR (376 MHz,  $\text{CDCl}_3$ ):  $\delta = -83.73$  (t,  $J = 3.3$  Hz, 3F),  $-114.54$  (q,  $J = 3.3$  Hz, 2F) ppm.

$^{13}\text{C}$  NMR (100 MHz,  $\text{CDCl}_3$ ):  $\delta = 160.2$ , 153.9 (t,  $J_{\text{C-F}} = 2.1$  Hz), 139.0 (t,  $J_{\text{C-F}} = 31.6$  Hz), 135.0, 133.3, 130.6, 128.7, 127.8, 126.6, 125.9, 125.0, 123.7, 119.9, 114.4, 114.0, 112.7 (m), 97.8 (t,  $J_{\text{C-F}} = 1.4$  Hz), 75.2 (t,  $J_{\text{C-F}} = 1.4$  Hz), 55.3, 34.1 ppm; carbons corresponding to the  $\text{C}_2\text{F}_5$  group cannot be identified due to C-F coupling.

HRMS (m/z): calcd for  $\text{C}_{24}\text{H}_{16}\text{F}_5\text{O}_2$   $[\text{M}+\text{H}]^+$  431.1065, found: 431.1064.

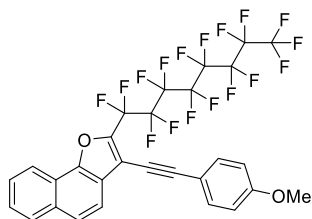

**3-((4-Methoxyphenyl)ethynyl)-2-(perfluorooctyl)naphtho[1,2-*b*]furan (3ne):**

Yield = 57% (81 mg). White solid. M.p. 125.6-125.9 °C.

IR (KBr):  $\nu = 2974$ , 2226, 1612, 1212, 813, 748  $\text{cm}^{-1}$ .

$^1\text{H}$  NMR (400 MHz,  $\text{CDCl}_3$ ):  $\delta = 8.34$  (d,  $J = 8.0$  Hz, 1H), 7.97 (d,  $J = 8.0$  Hz, 1H), 7.82 – 7.78 (m, 2H), 7.70 – 7.64 (m, 1H), 7.62 – 7.58 (m, 1H), 7.57 – 7.51 (m, 2H), 6.95 – 6.89 (m, 2H), 3.85 (s, 3H) ppm.

$^{19}\text{F}$  NMR (376 MHz,  $\text{CDCl}_3$ ):  $\delta = -80.65$  (t,  $J = 9.9$  Hz, 3F),  $-110.89$  –  $-111.23$  (m, 2F),  $-121.45$  –  $-121.96$  (m, 6F),  $-122.01$  –  $-122.24$  (m, 2F),  $-122.44$  –  $-122.85$  (m, 2F),  $-125.90$  –  $-126.28$  (m, 2F) ppm.

$^{13}\text{C}$  NMR (100 MHz,  $\text{CDCl}_3$ ):  $\delta = 160.3$ , 151.1 (t,  $J_{\text{C-F}} = 1.0$  Hz), 141.4 (t,  $J_{\text{C-F}} = 31.5$  Hz), 133.4, 133.0, 128.5, 127.2, 126.9, 125.2, 123.6, 121.0, 120.4, 118.5, 114.4, 114.1, 110.0 (m), 98.1 (t,  $J_{\text{C-F}} = 1.5$  Hz), 75.1 (t,  $J_{\text{C-F}} = 1.0$  Hz), 55.3 ppm; carbons corresponding to the  $\text{C}_8\text{F}_{17}$  group cannot be identified due to C-F coupling.

HRMS (m/z): calcd for  $\text{C}_{29}\text{H}_{14}\text{F}_{17}\text{O}_2$   $[\text{M}+\text{H}]^+$  717.0717, found: 717.0726.

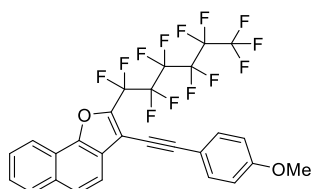

**3-((4-Methoxyphenyl)ethynyl)-2-(perfluorohexyl)naphtho[1,2-*b*]furan (3oe):**

Yield = 48% (59 mg). Light yellow solid. M.p. 104.3-106.1 °C.

IR (KBr):  $\nu = 2970$ , 2221, 1610, 1216, 812, 719  $\text{cm}^{-1}$ .

$^1\text{H}$  NMR (400 MHz,  $\text{CDCl}_3$ ):  $\delta = 8.34$  (d,  $J = 8.0$  Hz, 1H), 7.97 (d,  $J = 7.9$  Hz, 1H), 7.80 (d,  $J = 1.2$  Hz, 2H), 7.69 – 7.63 (m, 1H), 7.60 (ddd,  $J = 8.2$ , 7.0, 1.3 Hz, 1H), 7.57 – 7.52 (m, 2H), 6.95 – 6.89 (m, 2H), 3.85 (s, 3H) ppm.

$^{19}\text{F}$  NMR (376 MHz,  $\text{CDCl}_3$ ):  $\delta = -80.64$  (t,  $J = 9.8$  Hz, 3F),  $-110.89$  –  $-111.22$  (m, 2F),  $-121.67$  –  $-121.98$  (m, 2F),  $-122.01$  –  $-122.35$  (m, 2F),  $-122.40$  –  $-122.76$  (m, 2F),  $-125.90$  –  $-126.10$  (m, 2F) ppm.

$^{13}\text{C}$  NMR (100 MHz,  $\text{CDCl}_3$ ):  $\delta = 160.3$ , 151.1 (t,  $J_{\text{C-F}} = 1.4$  Hz), 141.4 (t,  $J_{\text{C-F}} = 31.1$  Hz), 133.4, 133.0, 128.5, 127.2, 126.9, 125.2, 123.5, 120.9, 120.4, 118.5, 114.4, 114.1, 110.0 (m), 98.1 (t,  $J_{\text{C-F}} = 1.6$  Hz), 75.2 (t,  $J_{\text{C-F}} = 1.0$  Hz), 55.3 ppm; carbons corresponding to the  $\text{C}_6\text{F}_{13}$  group cannot be identified due to C-F coupling.

HRMS (m/z): calcd for  $\text{C}_{27}\text{H}_{14}\text{F}_{13}\text{O}_2$   $[\text{M}+\text{H}]^+$  617.0781, found: 617.0790.



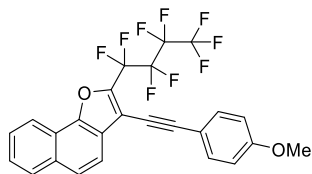

**3-((4-Methoxyphenyl)ethynyl)-2-(perfluorobutyl)naphtho[1,2-*b*]furan (3pe):**

Yield = 58% (60 mg). Yellow solid. M.p. 85.6-87.2 °C.

**IR** (KBr):  $\nu = 2958, 2222, 1596, 1242, 896, 749 \text{ cm}^{-1}$ .

**<sup>1</sup>H NMR** (400 MHz, CDCl<sub>3</sub>):  $\delta = 8.34$  (d,  $J = 8.1$  Hz, 1H), 7.97 (d,  $J = 7.8$  Hz, 1H), 7.80 (d,  $J = 1.2$  Hz, 2H), 7.69 – 7.63 (m, 1H), 7.60 (ddd,  $J = 8.2, 7.0, 1.4$  Hz, 1H), 7.57 – 7.52 (m, 2H), 6.97 – 6.88 (m, 2H), 3.85 (s, 3H) ppm.

**<sup>19</sup>F NMR** (376 MHz, CDCl<sub>3</sub>):  $\delta = -80.73$  (t,  $J = 9.7$  Hz, 3F),  $-111.28$  (t,  $J = 11.0$  Hz, 2F),  $-123.01$  –  $-123.19$  (m, 2F),  $-125.88$  –  $-126.16$  (m, 2F) ppm.

**<sup>13</sup>C NMR** (100 MHz, CDCl<sub>3</sub>):  $\delta = 160.3, 151.1$  (t,  $J_{\text{C-F}} = 1.1$  Hz), 141.3 (t,  $J_{\text{C-F}} = 30.9$  Hz), 133.4, 133.0, 128.5, 127.2, 126.9, 125.2, 123.5 (t,  $J_{\text{C-F}} = 1.3$  Hz), 120.9, 120.4, 118.5, 114.4, 114.1, 110.0 (m), 98.1 (t,  $J_{\text{C-F}} = 1.5$  Hz), 75.2 (t,  $J_{\text{C-F}} = 1.4$  Hz), 55.3 ppm; carbons corresponding to the C<sub>4</sub>F<sub>9</sub> group cannot be identified due to C-F coupling.

**HRMS** (m/z): calcd for C<sub>25</sub>H<sub>14</sub>F<sub>9</sub>O<sub>2</sub> [M+H]<sup>+</sup> 517.0845, found: 517.0845.

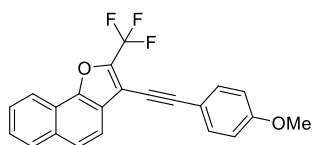

**3-((4-Methoxyphenyl)ethynyl)-2-(trifluoromethyl)naphtho[1,2-*b*]furan (3qe):**

Yield = 27% (20 mg); 51% (38 mg). Light yellow solid. M.p. 131.6-132.5 °C.

**IR** (KBr):  $\nu = 2963, 2222, 1599, 1190, 808, 748 \text{ cm}^{-1}$ .

**<sup>1</sup>H NMR** (400 MHz, CDCl<sub>3</sub>):  $\delta = 8.26$  (d,  $J = 8.0$  Hz, 1H), 7.89 (d,  $J = 8.0$  Hz, 1H), 7.71 (s, 2H), 7.61 – 7.55 (m, 1H), 7.55 – 7.45 (m, 3H), 6.88 – 6.81 (m, 2H), 3.77 (s, 3H) ppm.

**<sup>19</sup>F NMR** (376 MHz, CDCl<sub>3</sub>):  $\delta = -62.32$  (s, 3F) ppm.

**<sup>13</sup>C NMR** (100 MHz, CDCl<sub>3</sub>):  $\delta = 160.3, 150.3$  (q,  $J_{\text{C-F}} = 1.1$  Hz), 142.1 (t,  $J_{\text{C-F}} = 30.0$  Hz), 133.4, 133.0, 128.5, 127.1, 126.8, 125.2, 123.3, 121.0, 120.4, 120.0 (q,  $J_{\text{C-F}} = 267.3$  Hz), 118.6, 114.4, 114.1, 98.1 (q,  $J_{\text{C-F}} = 1.6$  Hz), 75.1 (q,  $J_{\text{C-F}} = 1.1$  Hz), 55.3 ppm.

**HRMS** (m/z): calcd for C<sub>22</sub>H<sub>14</sub>F<sub>3</sub>O<sub>2</sub> [M+H]<sup>+</sup> 367.0940, found: 367.0944.

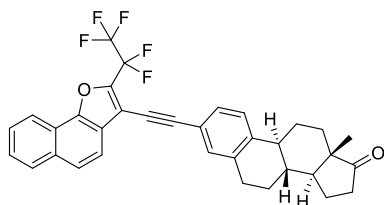

**(8*R*,9*S*,13*S*,14*S*)-13-Methyl-3-((2-(perfluoroethyl)naphtho[1,2-*b*]furan-3-yl)ethynyl)-**

**6,7,8,9,11,12,13,14,15,16-decahydro-17*H*-cyclopenta[*a*]phenanthren-17-one (4):**

Yield = 45% (60 mg). Light yellow solid. M.p. 178.2-179.8 °C.

**IR** (KBr):  $\nu = 2967, 2222, 1736, 1553, 1206, 817, 754 \text{ cm}^{-1}$ .

**<sup>1</sup>H NMR** (400 MHz, CDCl<sub>3</sub>):  $\delta = 8.34$  (d,  $J = 8.1$  Hz, 1H), 7.98 (d,  $J = 7.9$  Hz, 1H), 7.80 (s, 2H), 7.70 – 7.57 (m, 2H), 7.43 – 7.28 (m, 3H), 3.02 – 2.89 (m, 2H), 2.56 – 2.39 (m, 2H), 2.38 – 2.27 (m, 1H), 2.22 – 1.95 (m, 4H), 1.68 – 1.45 (m, 6H), 0.93 (s, 3H) ppm.

<sup>19</sup>F NMR (376 MHz, CDCl<sub>3</sub>): δ = -83.55 (t, *J* = 3.6 Hz, 3F), -114.35 (q, *J* = 3.6 Hz, 2F) ppm.

<sup>13</sup>C NMR (100 MHz, CDCl<sub>3</sub>): δ = 220.8, 151.0 (t, *J*<sub>C-F</sub> = 1.1 Hz), 144.1 (t, *J*<sub>C-F</sub> = 9.1 Hz), 141.3, 136.8, 132.9, 132.2, 129.1, 128.5, 127.2, 126.9, 125.5, 125.3, 123.5 (t, *J*<sub>C-F</sub> = 1.0 Hz), 120.9, 120.4, 119.6, 118.4, 109.5 (m), 98.3 (t, *J*<sub>C-F</sub> = 1.3 Hz), 75.6 (t, *J*<sub>C-F</sub> = 0.8 Hz), 50.4, 47.9, 44.5, 37.9, 35.8, 31.5, 29.1, 26.3, 25.5, 21.5, 13.8 ppm; carbons corresponding to the C<sub>2</sub>F<sub>5</sub> group cannot be identified due to C-F coupling.

HRMS (m/z): calcd for C<sub>34</sub>H<sub>28</sub>F<sub>5</sub>O<sub>2</sub> [M+H]<sup>+</sup> 563.2004, found: 563.2003.

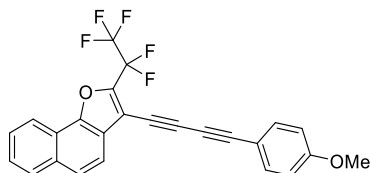

**3-((4-Methoxyphenyl)buta-1,3-diyne-1-yl)-2-(perfluoroethyl)naphtho[1,2-*b*]furan (5):**

Yield = 34% (30 mg). Pink solid. M.p. 134.0-134.8 °C.

IR (KBr): ν = 2976, 2214, 1602, 1210, 828, 758 cm<sup>-1</sup>.

<sup>1</sup>H NMR (400 MHz, CDCl<sub>3</sub>): δ = 8.33 (d, *J* = 8.1 Hz, 1H), 7.98 (d, *J* = 7.8 Hz, 1H), 7.84 – 7.76 (m, 2H), 7.70 – 7.59 (m, 2H), 7.56 – 7.50 (m, 2H), 6.93 – 6.86 (m, 2H), 3.85 (s, 3H) ppm.

<sup>19</sup>F NMR (376 MHz, CDCl<sub>3</sub>): δ = -83.54 (t, *J* = 4.0 Hz, 3F), -114.51 (q, *J* = 4.0 Hz, 2F) ppm.

<sup>13</sup>C NMR (100 MHz, CDCl<sub>3</sub>): δ = 160.7, 151.0 (t, *J*<sub>C-F</sub> = 0.9 Hz), 143.4 (t, *J*<sub>C-F</sub> = 30.0 Hz), 134.3, 133.0, 128.5, 127.3, 127.1, 125.6, 123.8, 120.9, 120.4, 118.3, 114.2, 113.0, 108.4 (m), 84.2, 82.5 (t, *J*<sub>C-F</sub> = 1.7 Hz), 72.3 (t, *J*<sub>C-F</sub> = 1.3 Hz), 67.6 (t, *J*<sub>C-F</sub> = 1.0 Hz), 55.4 ppm; carbons corresponding to the C<sub>2</sub>F<sub>5</sub> group cannot be identified due to C-F coupling.

HRMS (m/z): calcd for C<sub>25</sub>H<sub>14</sub>F<sub>5</sub>O<sub>2</sub> [M+H]<sup>+</sup> 441.0908, found: 441.0910.

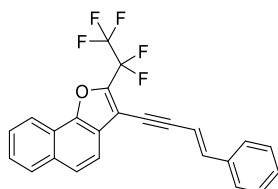

**(*E*)-2-(Perfluoroethyl)-3-(4-phenylbut-3-en-1-yn-1-yl)naphtho[1,2-*b*]furan (6):**

Yield = 46% (38 mg). Light yellow solid. M.p. 139.7-141.5 °C.

IR (KBr): ν = 3027, 2202, 1581, 809, 740 cm<sup>-1</sup>.

<sup>1</sup>H NMR (400 MHz, CDCl<sub>3</sub>): δ = 8.30 (d, *J* = 8.1 Hz, 1H), 7.94 (d, *J* = 7.9 Hz, 1H), 7.76 (d, *J* = 1.6 Hz, 2H), 7.67 – 7.54 (m, 2H), 7.45 (d, *J* = 7.2 Hz, 2H), 7.39 – 7.29 (m, 3H), 7.15 (d, *J* = 16.3 Hz, 1H), 6.45 (d, *J* = 16.3 Hz, 1H) ppm.

<sup>19</sup>F NMR (376 MHz, CDCl<sub>3</sub>): δ = -83.54 (t, *J* = 2.7 Hz, 3F), -114.33 (q, *J* = 2.7 Hz, 2F) ppm.

<sup>13</sup>C NMR (100 MHz, CDCl<sub>3</sub>): δ = 151.0 (t, *J* = 1.1 Hz), 143.1, 141.4 (t, *J*<sub>C-F</sub> = 31.0 Hz), 135.8, 132.9, 129.1, 128.8, 128.4, 127.1, 126.9, 126.5, 125.3, 123.5 (t, *J*<sub>C-F</sub> = 1.3 Hz), 120.9, 120.3, 118.3, 109.5 (m), 107.2, 97.5, 78.3 (t, *J* = 1.2 Hz) ppm; carbons corresponding to the C<sub>2</sub>F<sub>5</sub> group cannot be identified due to C-F coupling.

HRMS (m/z): calcd for C<sub>24</sub>H<sub>14</sub>F<sub>5</sub>O [M+H]<sup>+</sup> 413.0959, found: 413.0956.

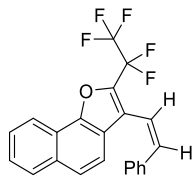

**(Z)-2-(Perfluoroethyl)-3-styrylnaphtho[1,2-*b*]furan (7):**

Yield = 98% (66 mg). Yellow solid. M.p. 75.7-77.3 °C.

**IR** (KBr):  $\nu = 3034, 1595, 814, 753 \text{ cm}^{-1}$ .

**<sup>1</sup>H NMR** (400 MHz, CDCl<sub>3</sub>):  $\delta = 8.34$  (d,  $J = 8.2$  Hz, 1H), 7.84 (d,  $J = 8.2$  Hz, 1H), 7.65 – 7.58 (m, 1H), 7.56 – 7.50 (m, 1H), 7.39 (d,  $J = 8.8$  Hz, 1H), 7.17 (dd,  $J = 7.2, 2.5$  Hz, 2H), 7.14 – 7.08 (m, 3H), 6.96 (d,  $J = 12.2$  Hz, 1H), 6.91 (d,  $J = 8.7$  Hz, 1H), 6.69 (dt,  $J = 12.1, 3.5$  Hz, 1H) ppm.

**<sup>19</sup>F NMR** (376 MHz, CDCl<sub>3</sub>):  $\delta = -83.73$  (t,  $J = 3.6$  Hz, 3F),  $-114.21$  (q,  $J = 3.6$  Hz, 2F) ppm.

**<sup>13</sup>C NMR** (100 MHz, CDCl<sub>3</sub>):  $\delta = 151.4$  (t,  $J_{\text{C-F}} = 1.1$  Hz), 137.0 (t,  $J_{\text{C-F}} = 30.4$  Hz), 136.3, 135.2 (t,  $J_{\text{C-F}} = 1.6$  Hz), 132.4, 128.9, 128.3, 128.3, 127.8, 126.8, 126.6, 124.1, 123.4 (t,  $J_{\text{C-F}} = 2.2$  Hz), 121.4 (t,  $J_{\text{C-F}} = 1.0$  Hz), 121.0, 120.4, 119.8, 116.1 ppm; carbons corresponding to the C<sub>2</sub>F<sub>5</sub> group cannot be identified due to C-F coupling.

**HRMS** (m/z): calcd for C<sub>22</sub>H<sub>14</sub>F<sub>5</sub>O [M+H]<sup>+</sup> 389.0959, found: 389.0953.

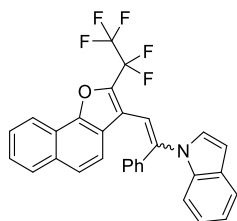

**1-(2-(2-(Perfluoroethyl)naphtho[1,2-*b*]furan-3-yl)-1-phenylvinyl)-1H-indole (8):**

Yield = 75% (58 mg, *Z/E* = 1/3). White solid. M.p. 73.0-74.3 °C.

**IR** (KBr):  $\nu = 3028, 1563, 1212, 810, 743 \text{ cm}^{-1}$ .

**<sup>1</sup>H NMR** (400 MHz, CDCl<sub>3</sub>):  $\delta = 8.36 - 8.22$  (m, 1H), 7.83 – 7.65 (m, 1H), 7.64 – 7.31 (m, 7H), 7.27 – 7.22 (m, 1H), 7.19 – 6.97 (m, 5H), 6.94 – 6.85 (m, 1H), 6.67 – 6.38 (m, 2H) ppm.

**<sup>19</sup>F NMR** (376 MHz, CDCl<sub>3</sub>):  $\delta = -83.35 - -83.55$  (m, 3F),  $-113.20 - -113.85$  (m, 2F) ppm.

**<sup>13</sup>C NMR** (100 MHz, CDCl<sub>3</sub>):  $\delta = 150.9$  (m), 141.8 (t,  $J_{\text{C-F}} = 1.4$  Hz), 137.3, 136.1, 135.5, 132.4, 129.7, 129.7, 129.2, 129.0, 128.8, 128.1, 127.5, 126.7, 126.5, 124.3, 122.4, 121.4 (m), 120.9, 120.7, 120.5, 120.3, 118.3, 112.2, 108.9 (m), 104.6 (m) ppm; carbons corresponding to the C<sub>2</sub>F<sub>5</sub> group cannot be identified due to C-F coupling.

**HRMS** (m/z): calcd for C<sub>30</sub>H<sub>19</sub>F<sub>5</sub>NO [M+H]<sup>+</sup> 504.1381, found: 504.1378.

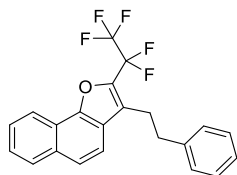

**2-(Perfluoroethyl)-3-phenethylnaphtho[1,2-*b*]furan (9):**

Yield = 76% (60 mg). Light yellow solid. M.p. 68.6-69.9 °C.

**IR** (KBr):  $\nu = 3025, 1523, 802, 753 \text{ cm}^{-1}$ .

**<sup>1</sup>H NMR** (400 MHz, CDCl<sub>3</sub>):  $\delta = 8.37 - 8.30$  (m, 1H), 7.97 – 7.92 (m, 1H), 7.69 (d,  $J = 8.6$  Hz, 1H), 7.64 (t,  $J = 7.1$  Hz, 1H), 7.60 – 7.55 (m, 1H), 7.50 (d,  $J = 8.6$  Hz, 1H), 7.31 – 7.27 (m, 2H), 7.22 – 7.16 (m, 3H), 3.24 – 3.16 (m,

2H), 3.04 – 2.97 (m, 2H) ppm.

<sup>19</sup>F NMR (376 MHz, CDCl<sub>3</sub>):  $\delta$  = -83.94 (t,  $J$  = 2.8 Hz, 3F), -113.65 (q,  $J$  = 2.8 Hz, 2F) ppm.

<sup>13</sup>C NMR (100 MHz, CDCl<sub>3</sub>):  $\delta$  = 151.1 (t,  $J_{C-F}$  = 1.2 Hz), 142.6 (t,  $J_{C-F}$  = 30.2 Hz), 140.8, 132.5, 128.5, 128.4, 128.3, 128.2, 126.9, 126.5, 126.3, 124.3, 123.3, 121.1, 120.5, 117.9, 36.7, 25.6 (t,  $J_{C-F}$  = 1.9 Hz) ppm; carbons corresponding to the C<sub>2</sub>F<sub>5</sub> group cannot be identified due to C-F coupling.

HRMS (m/z): calcd for C<sub>22</sub>H<sub>16</sub>F<sub>5</sub>O [M+H]<sup>+</sup> 391.1116, found: 391.1115.

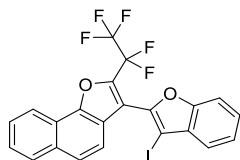

**3-(3-Iodobenzofuran-2-yl)-2-(perfluoroethyl)naphtho[1,2-b]furan (10):**

Yield = 99% (52 mg). White solid. M.p. 118.3-119.7 °C.

IR (KBr):  $\nu$  = 2923, 1537, 1220, 809, 745, 562 cm<sup>-1</sup>.

<sup>1</sup>H NMR (400 MHz, CDCl<sub>3</sub>):  $\delta$  = 8.40 (d,  $J$  = 8.2 Hz, 1H), 7.97 (d,  $J$  = 8.1 Hz, 1H), 7.77 (d,  $J$  = 8.7 Hz, 1H), 7.71 – 7.65 (m, 1H), 7.65 – 7.51 (m, 4H), 7.48 – 7.36 (m, 2H) ppm.

<sup>19</sup>F NMR (376 MHz, CDCl<sub>3</sub>):  $\delta$  = -83.12 (t,  $J$  = 3.3 Hz, 3F), -114.03 (q,  $J$  = 3.3 Hz, 2F) ppm.

<sup>13</sup>C NMR (100 MHz, CDCl<sub>3</sub>):  $\delta$  = 154.9, 151.3, 145.8, 140.0 (t,  $J_{C-F}$  = 32.3 Hz), 132.9, 131.1, 128.5, 127.3, 127.1, 126.3, 125.4, 123.8, 122.2, 121.8, 121.0, 120.4, 119.4, 116.3 (m), 111.6, 68.5 ppm; carbons corresponding to the C<sub>2</sub>F<sub>5</sub> group cannot be identified due to C-F coupling.

HRMS (m/z): calcd for C<sub>22</sub>H<sub>11</sub>F<sub>5</sub>IO<sub>2</sub> [M+H]<sup>+</sup> 528.9718, found: 528.9719.

## 11. References

- [1] P. V. Pham, D. A. Nagib, D. W. C. MacMillan, *Angew. Chem. Int. Ed.* **2011**, *50*, 6119–6122.
- [2] (a) X. Su, H. Huang, Y. Yuan, Y. Li, *Angew. Chem., Int. Ed.* **2017**, *56*, 1338–1341. (b) T. Xie, Y.-W. Zhang, L.-L. Liu, Z.-L. Shen, T.-P. Loh, X.-Q. Chu, *Chem. Commun.* **2018**, *54*, 12722–12725.
- [3] (a) M. Gazvoda, M. Virant, B. Pinter, J. Košmrlj, *Nat. Commun.* **2018**, *9*, 4814. (b) J. Vicente, J.-A. Abad, J. Lopez-Serrano, *Organometallics* **2005**, *24*, 5044-5057. (c) C. Amatore, S. Bensalem, S. Ghalem, A. Jutand, *J. Organomet. Chem.* **2004**, *689*, 4642–4646.

## 12. $^1\text{H}$ , $^{19}\text{F}$ , and $^{13}\text{C}$ NMR spectra of products

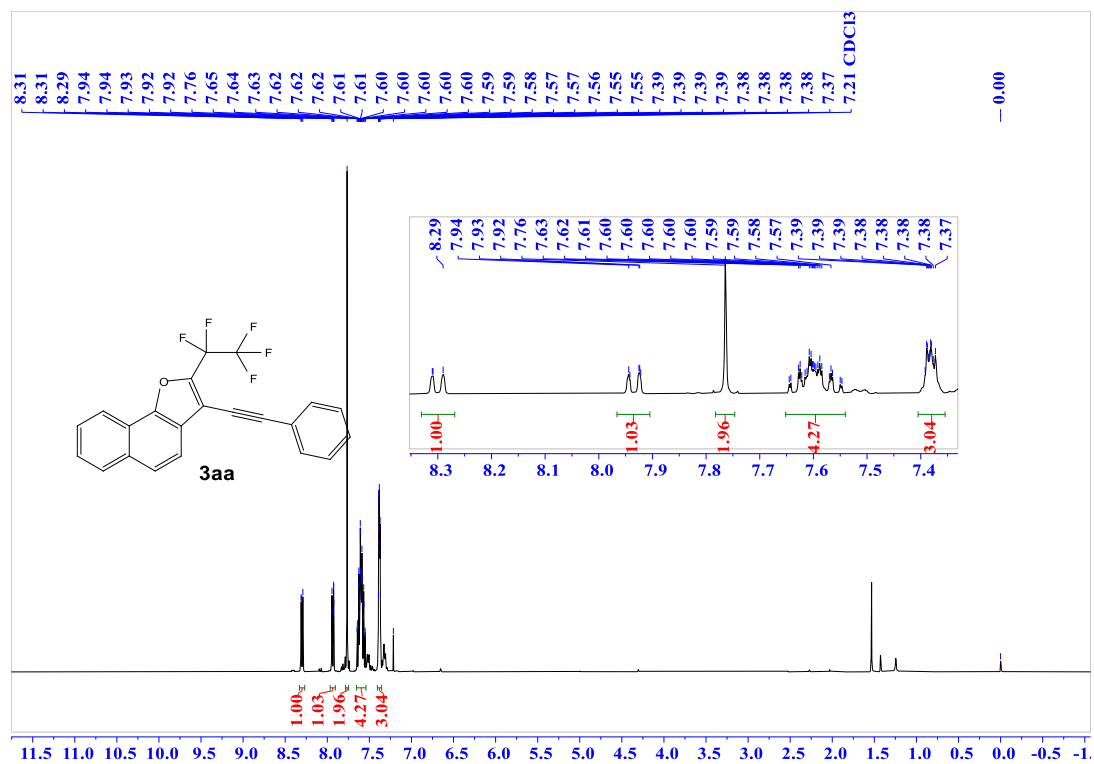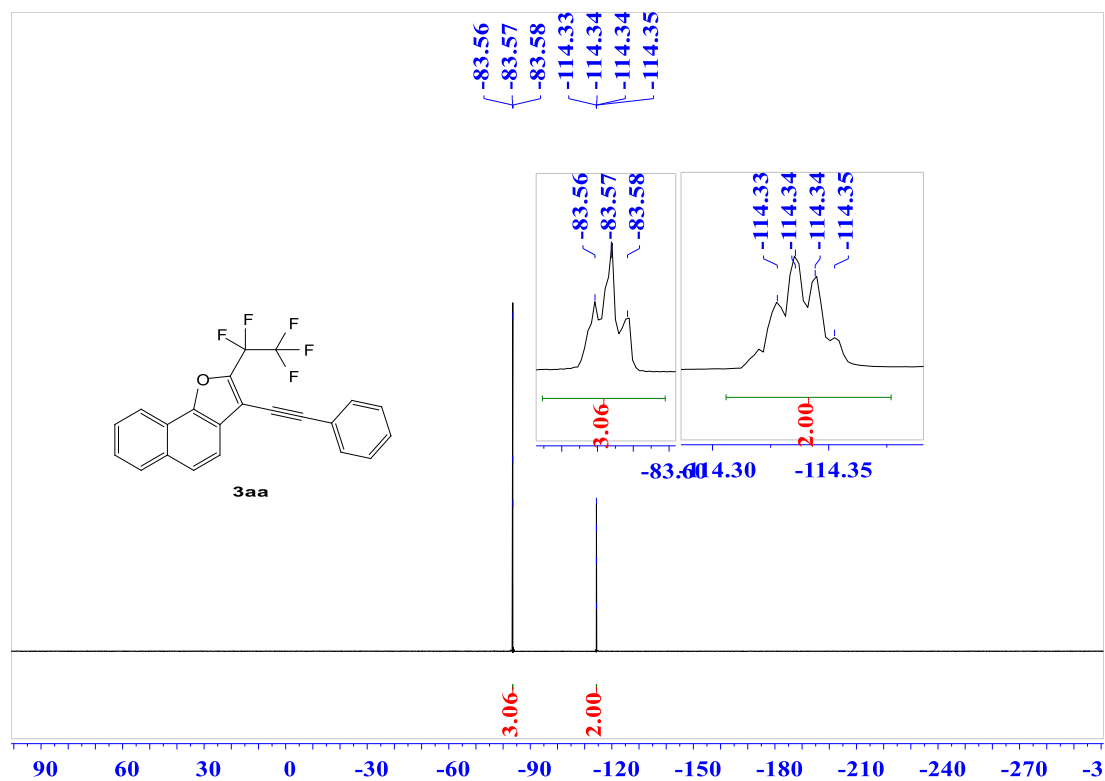

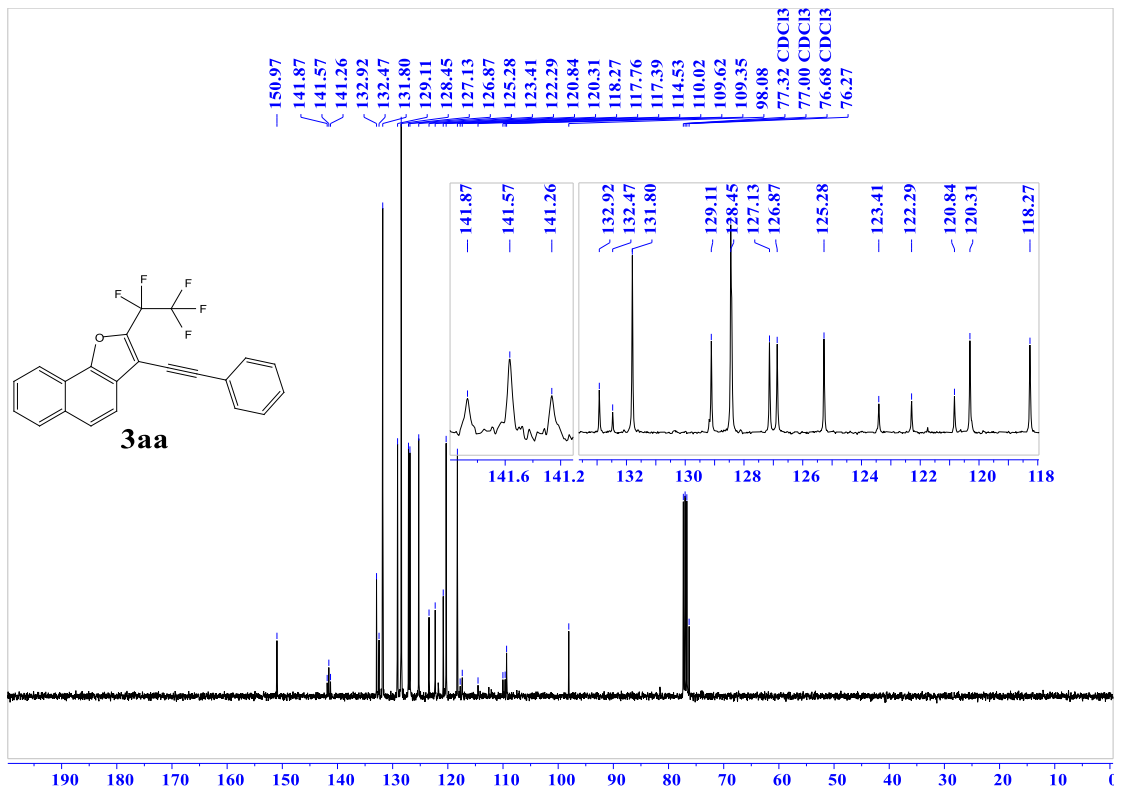

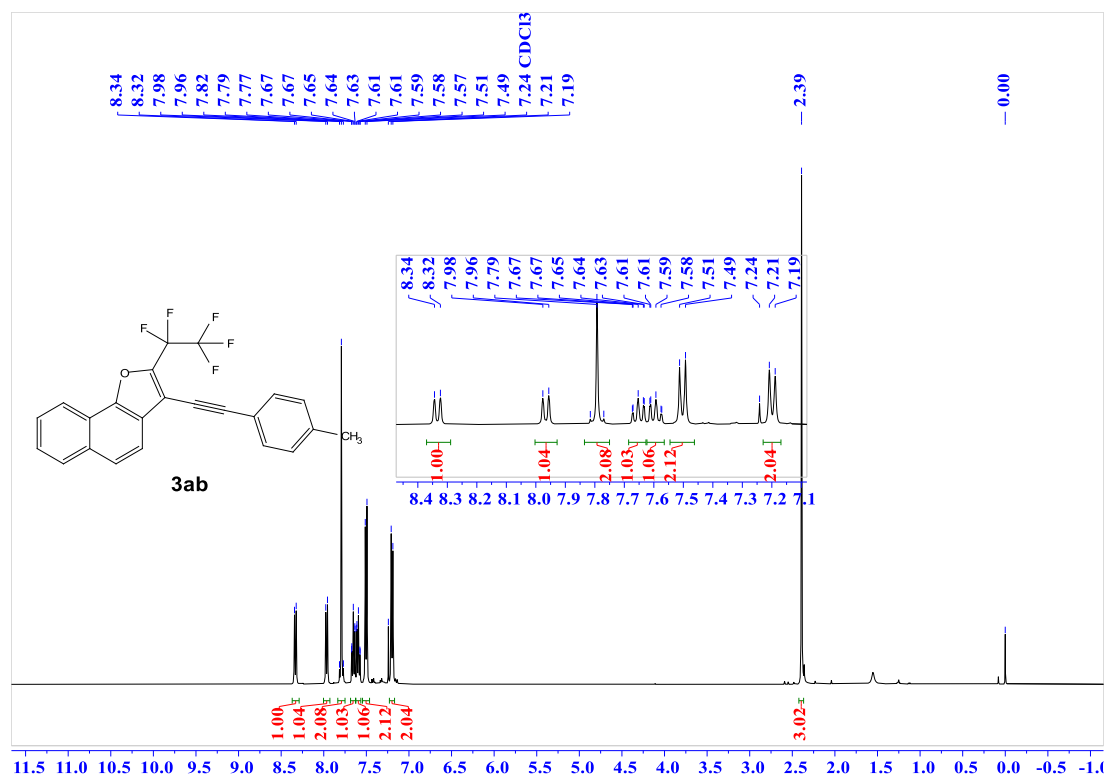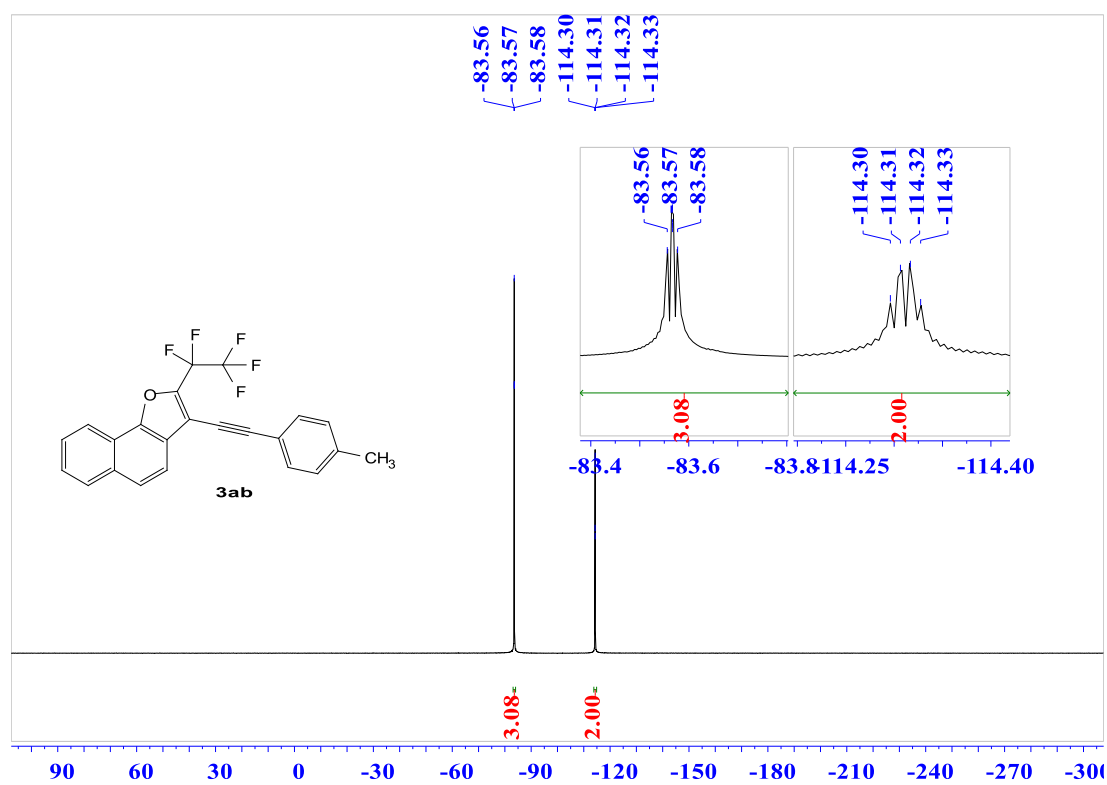

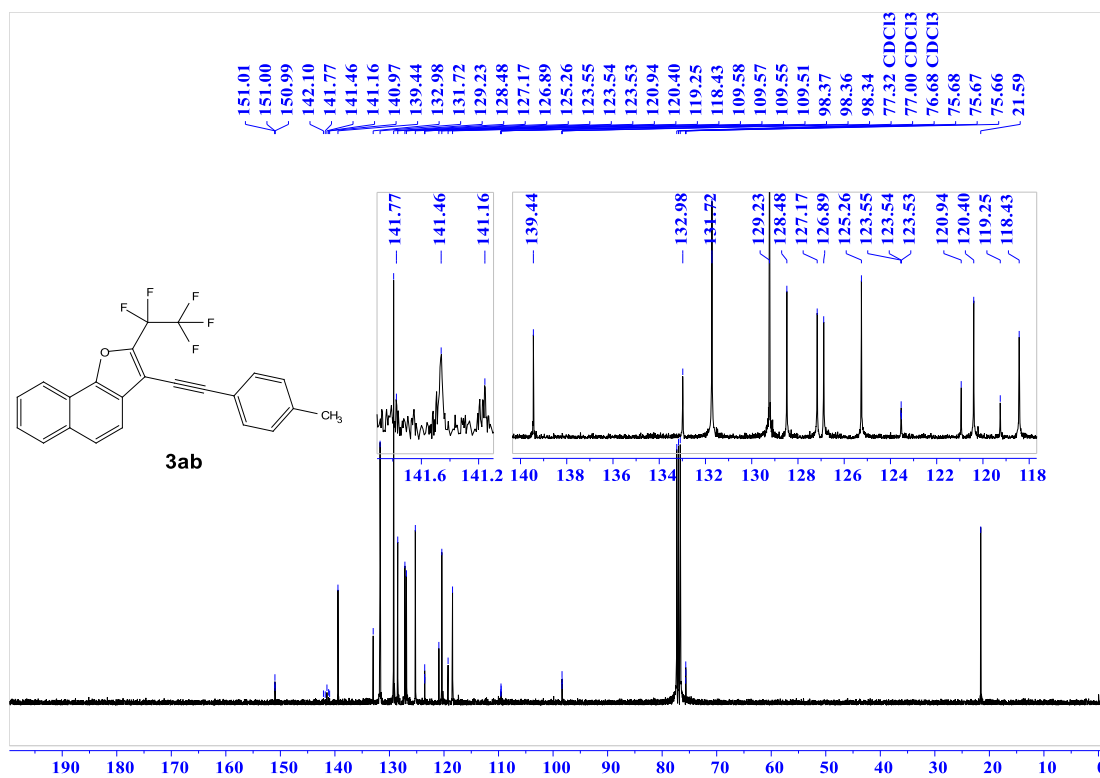



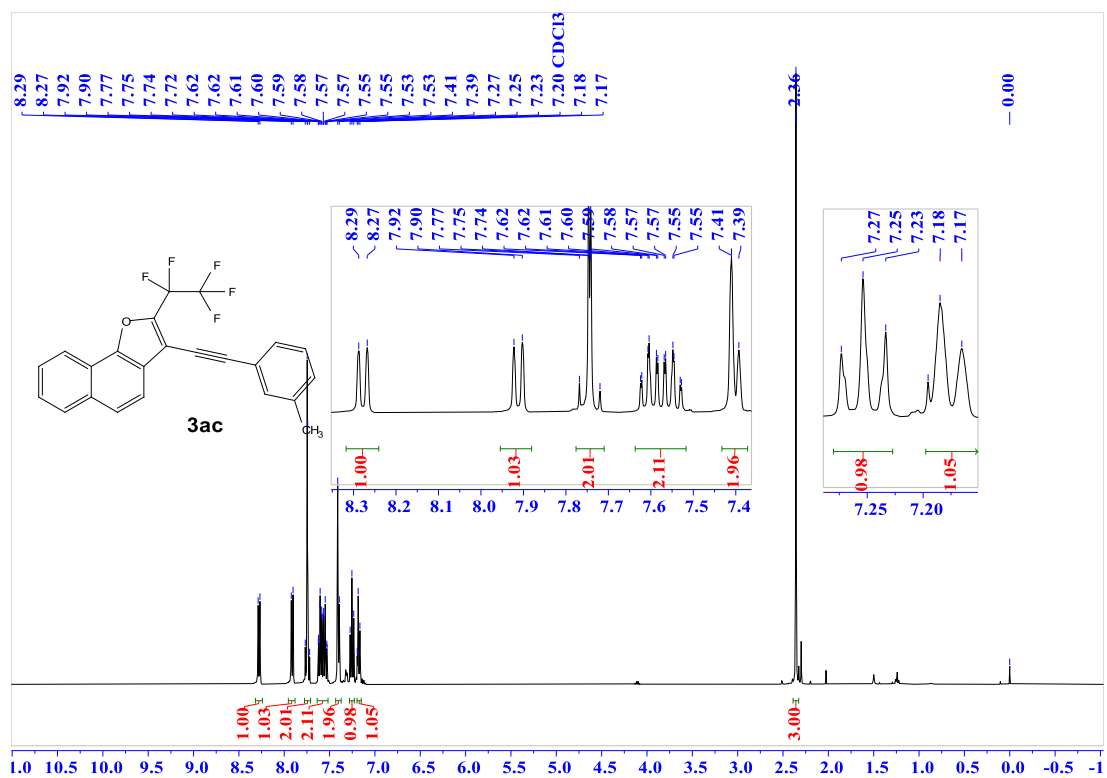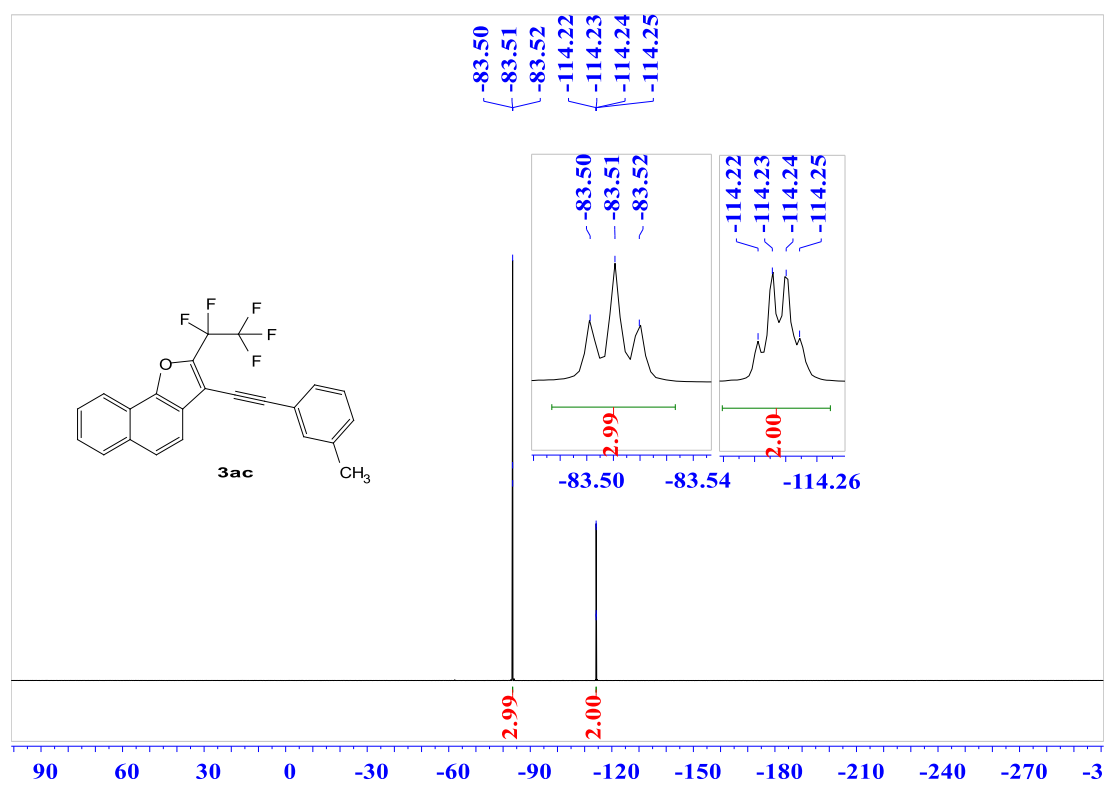

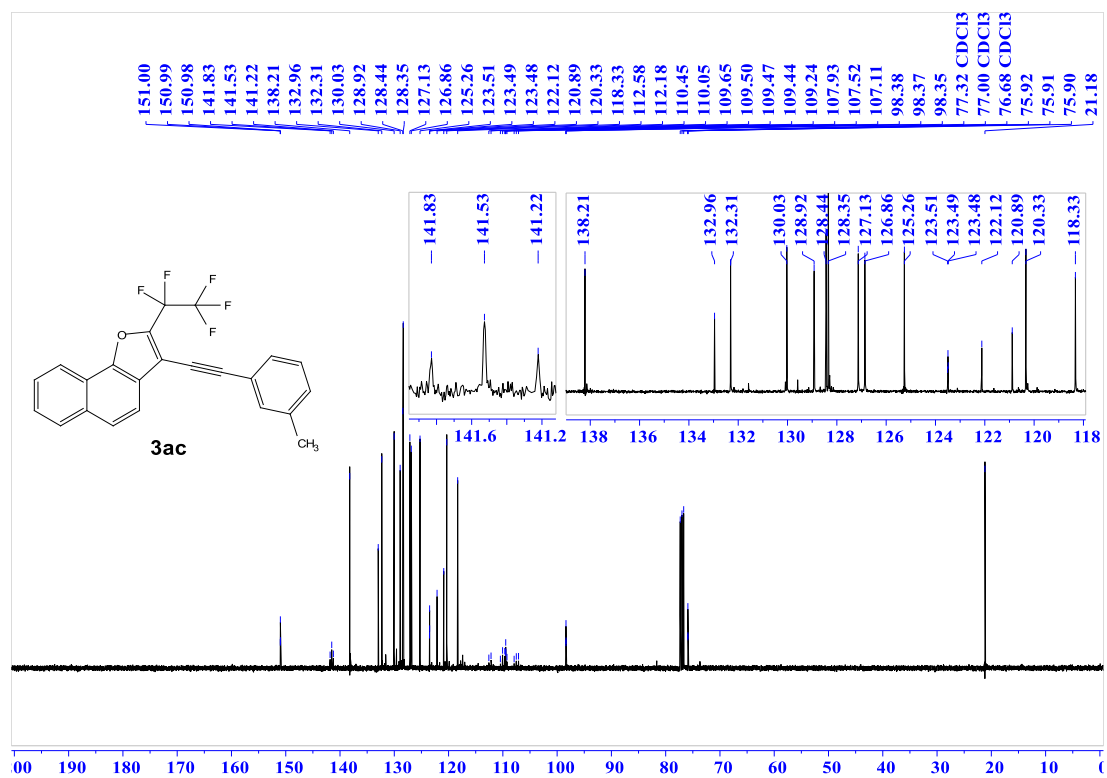

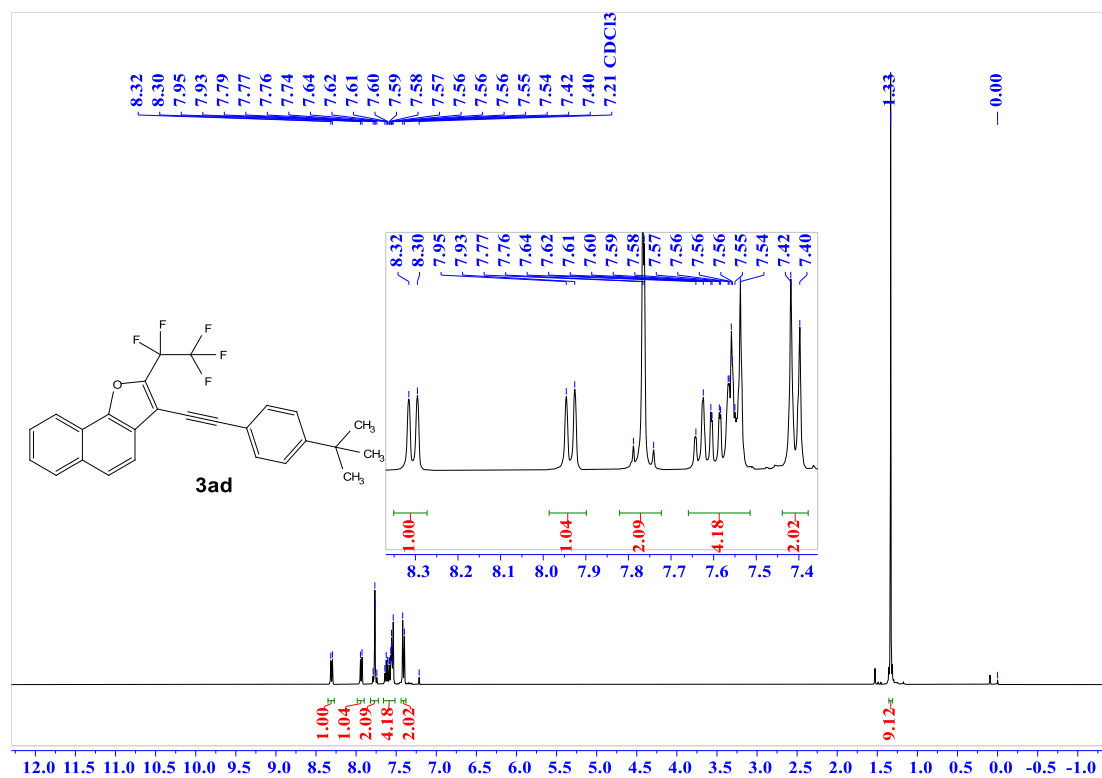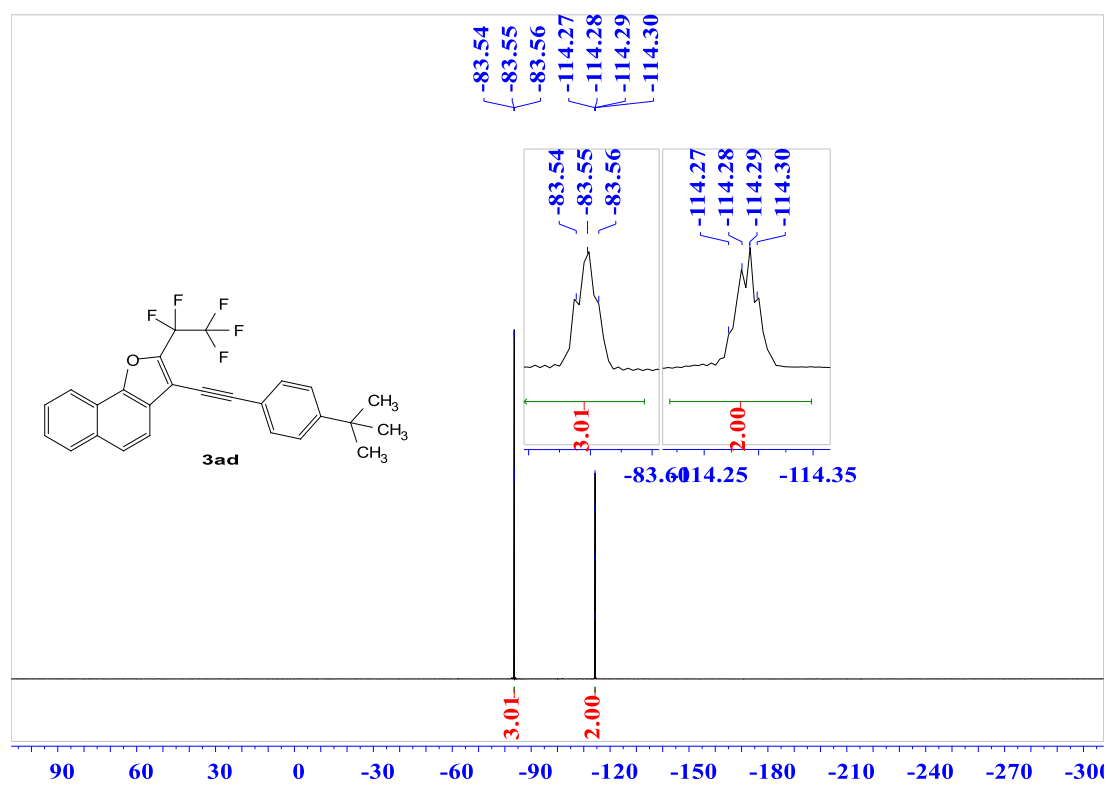

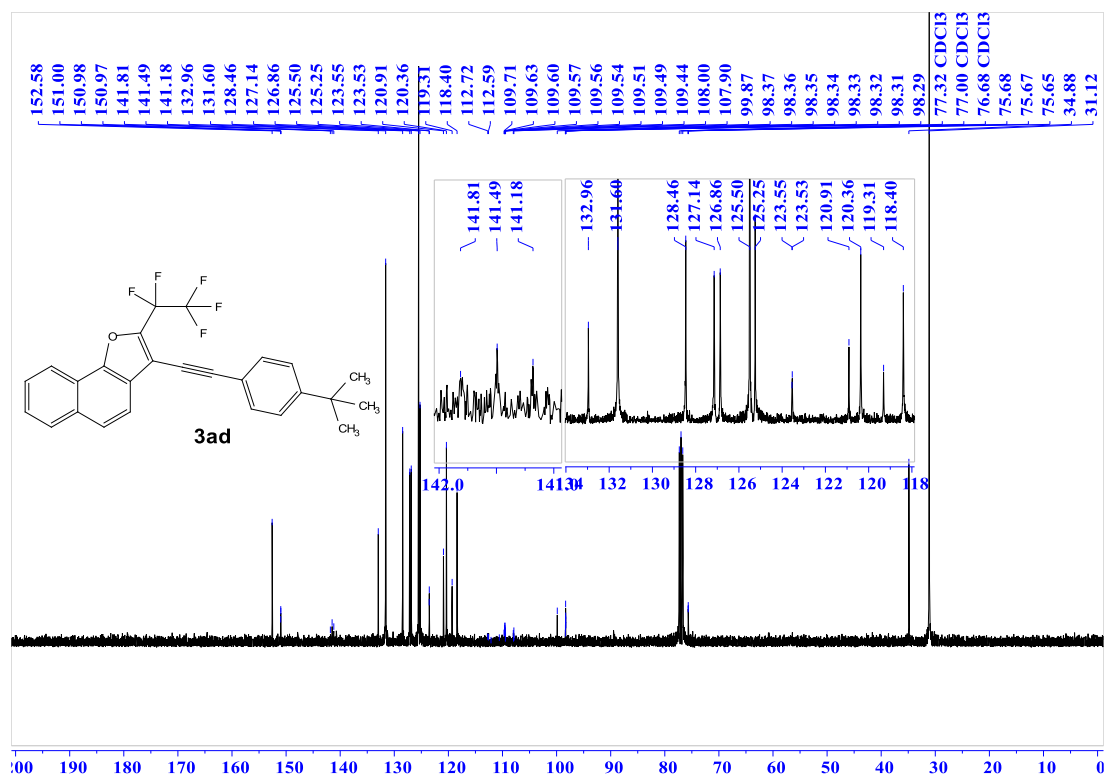



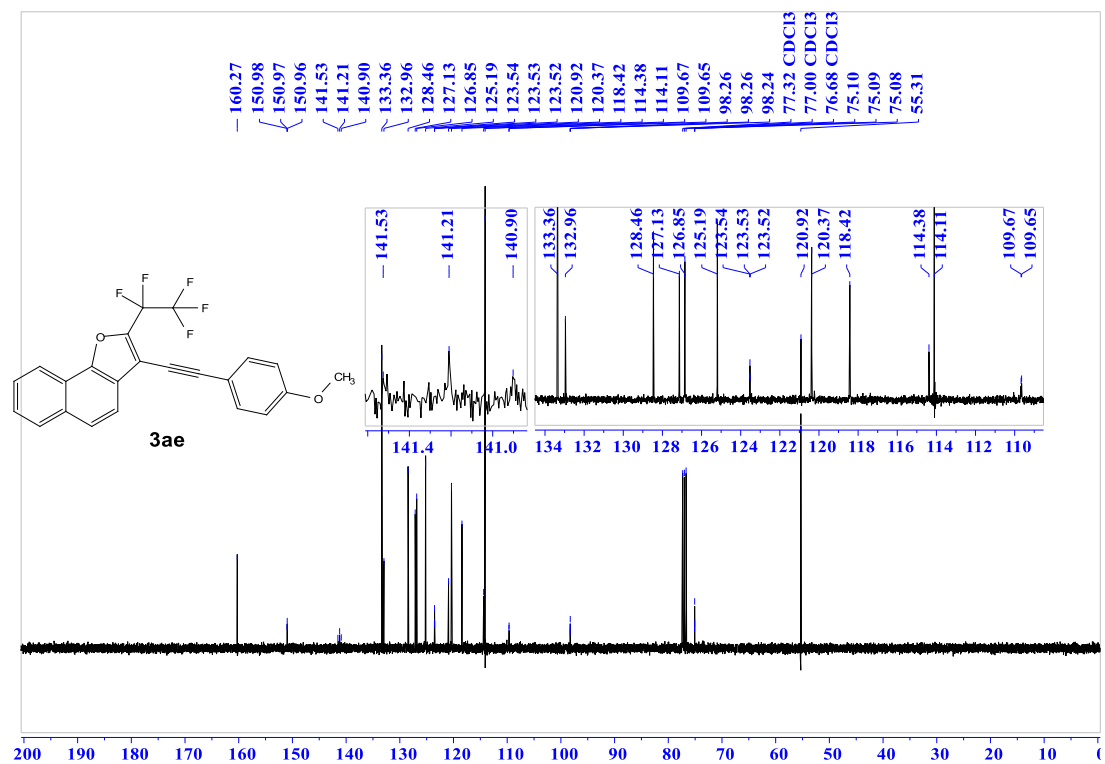



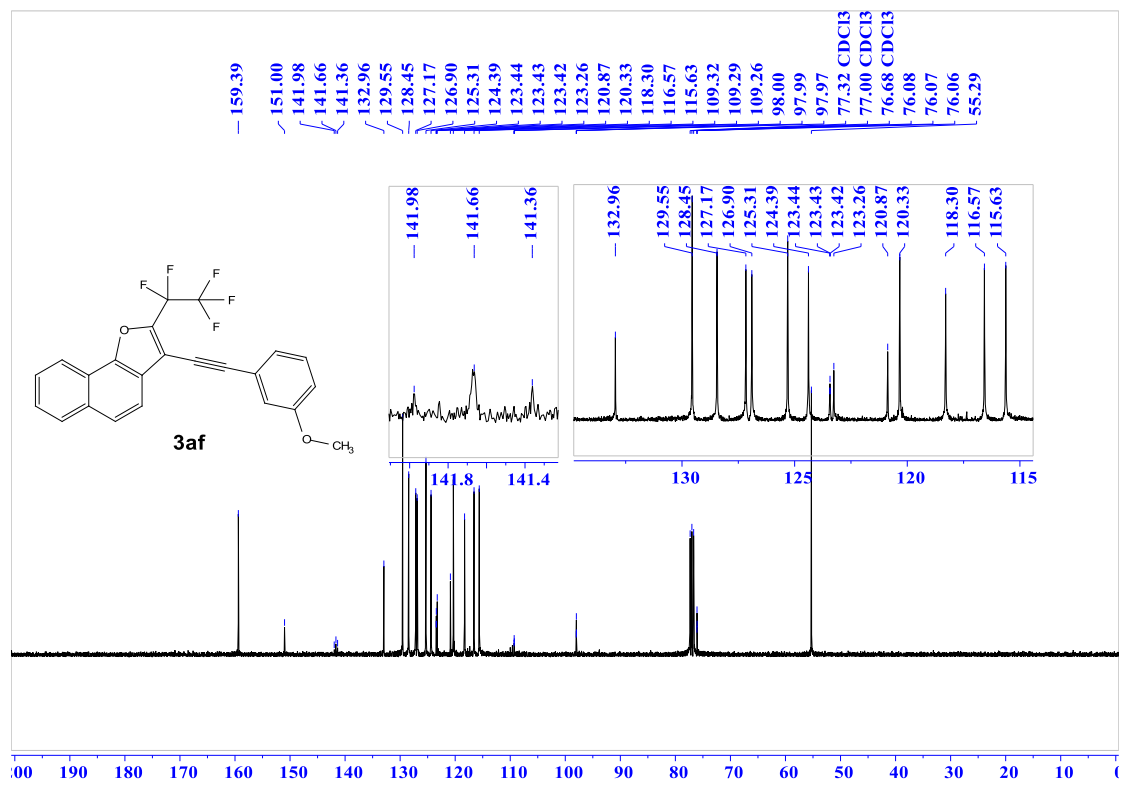





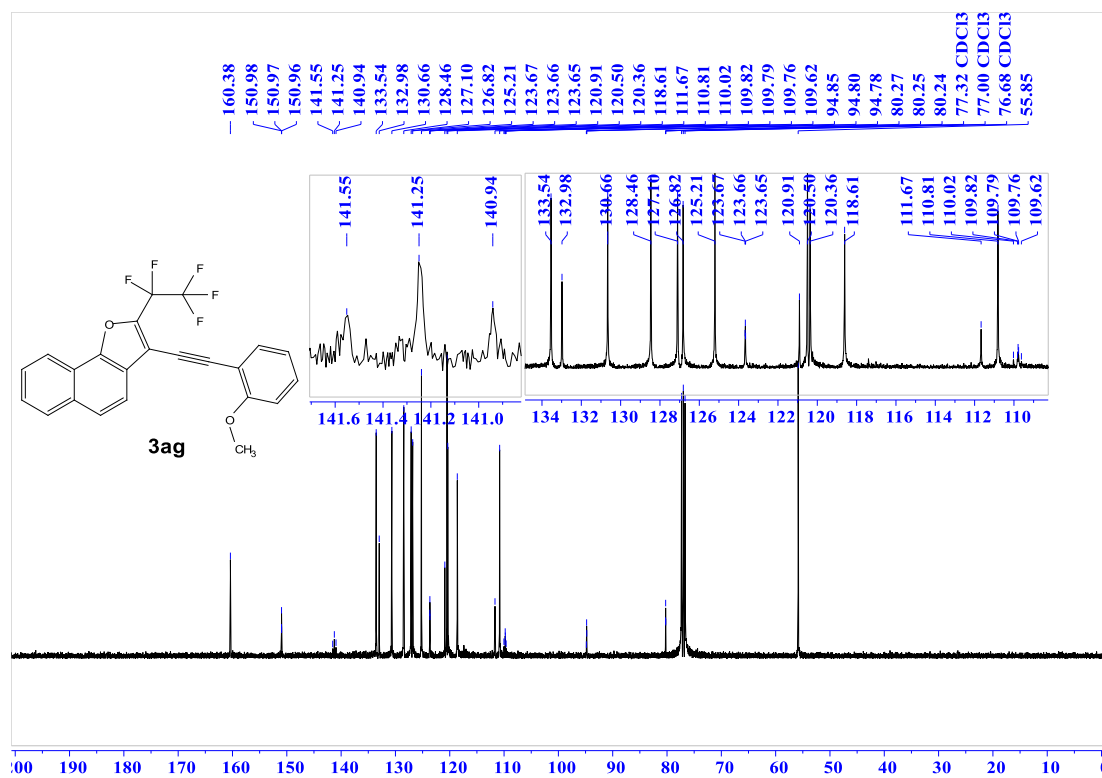

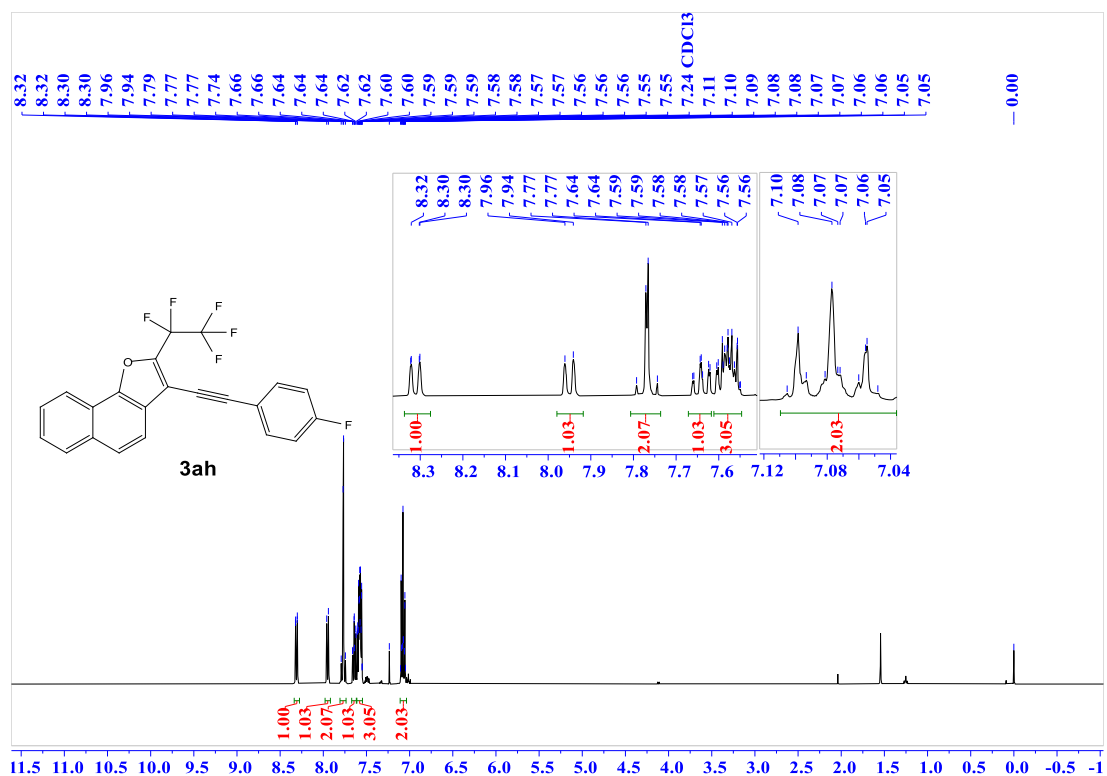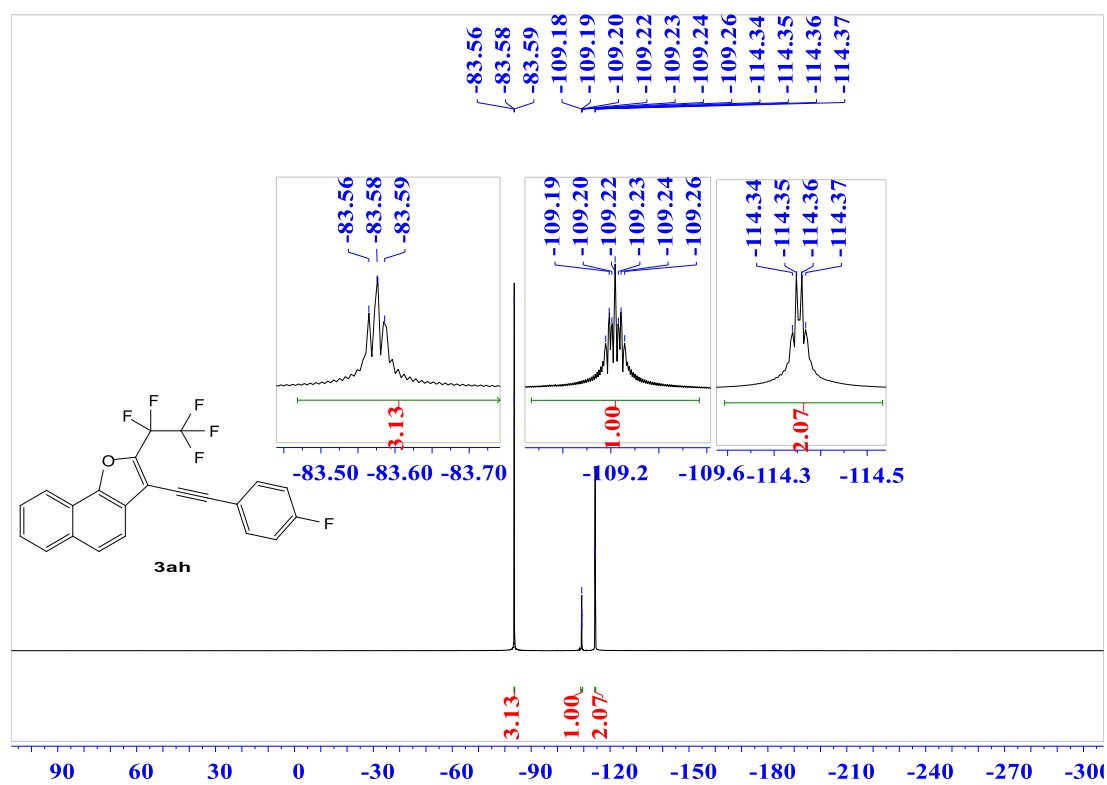

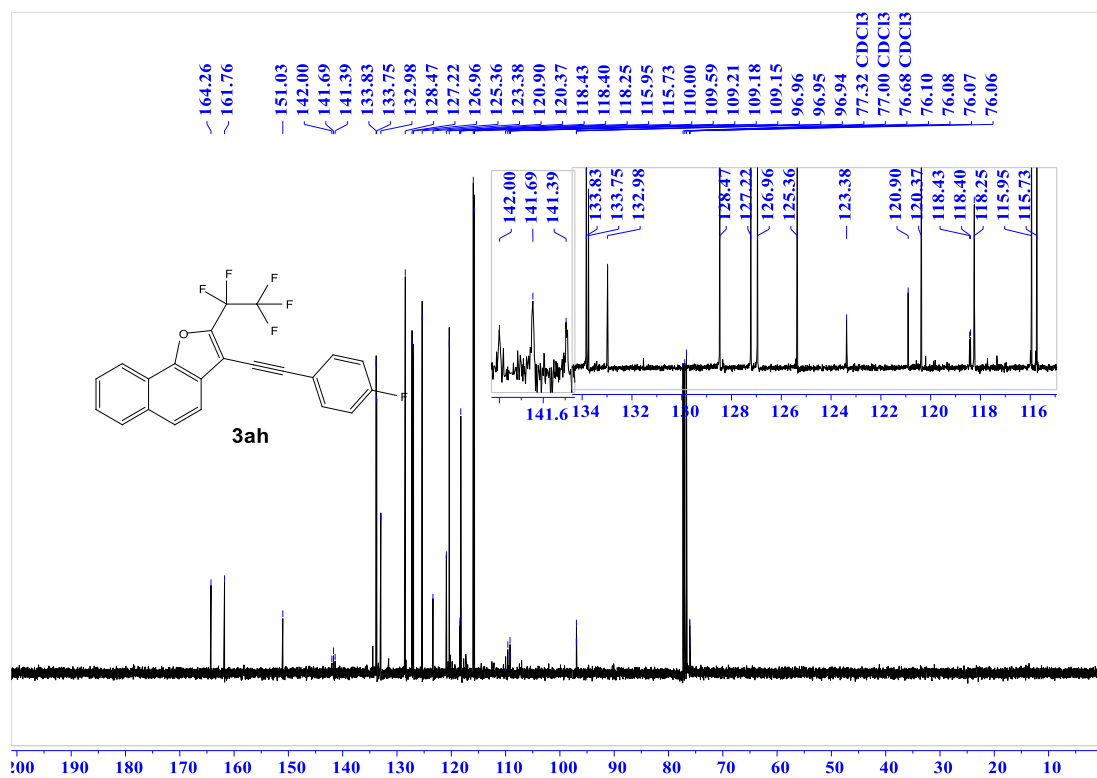

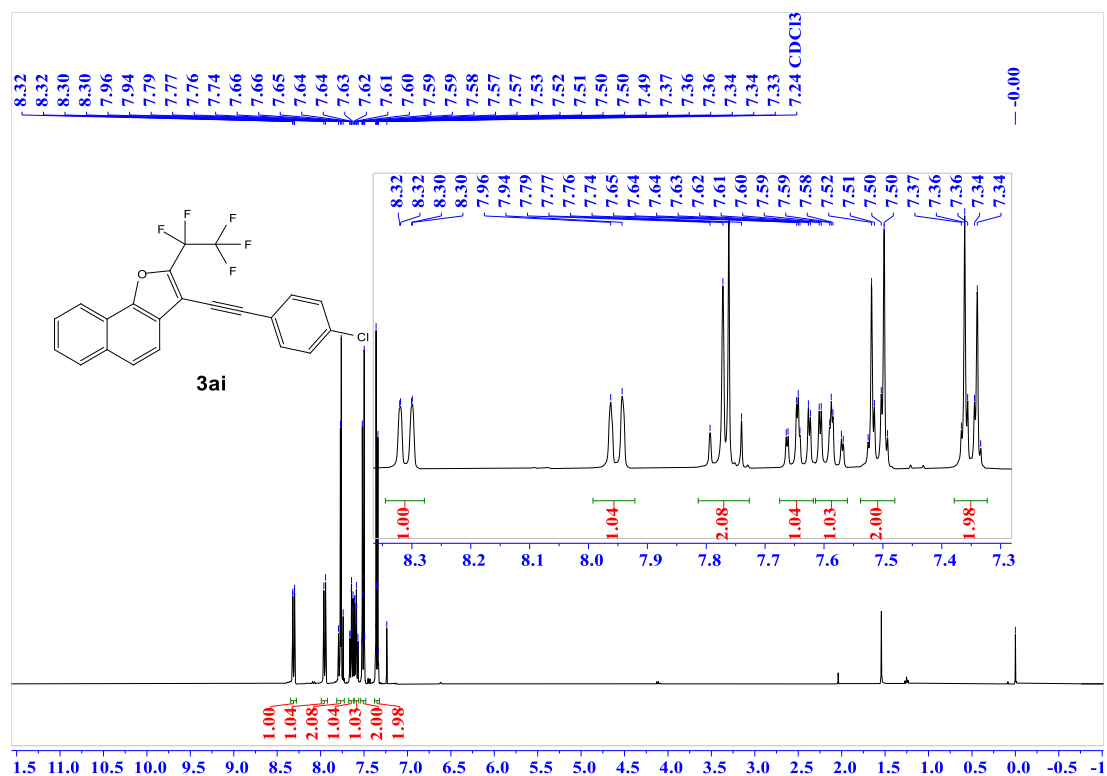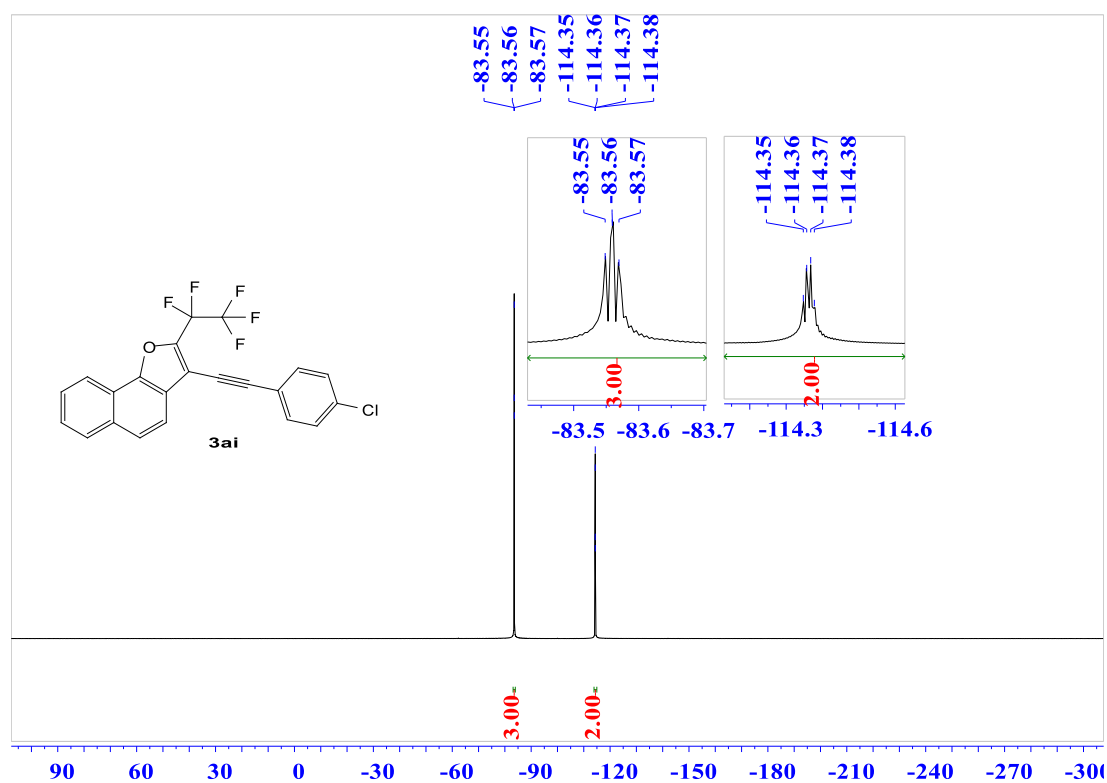

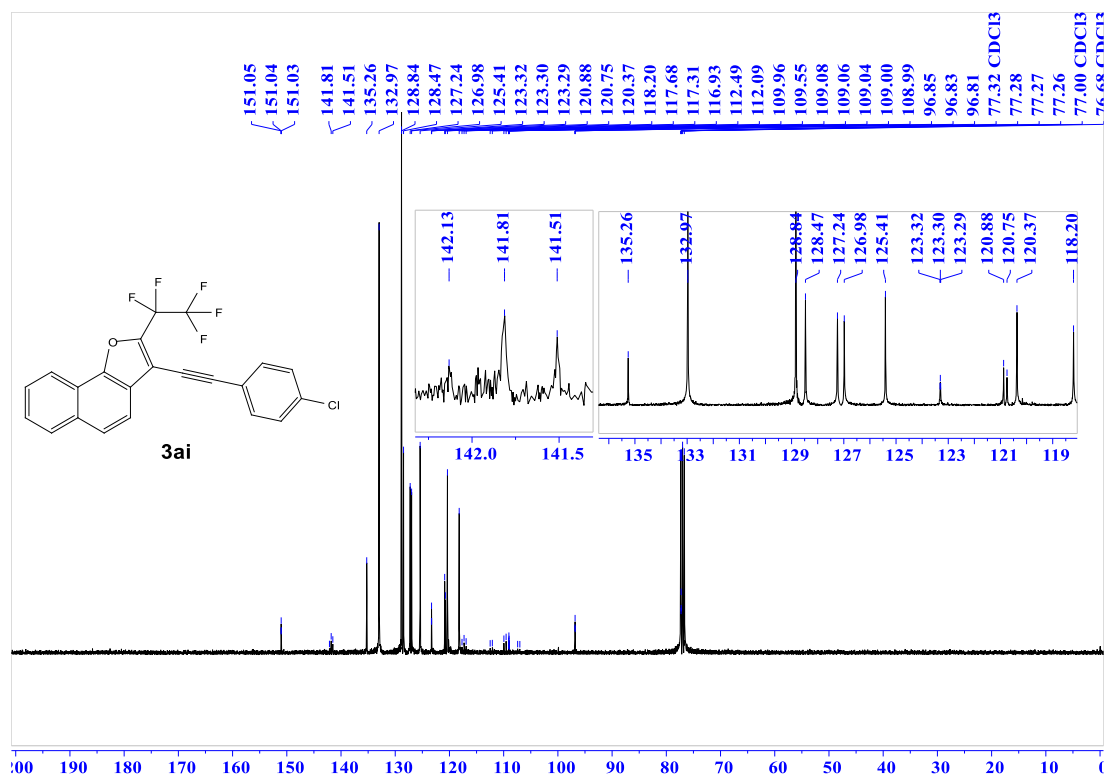

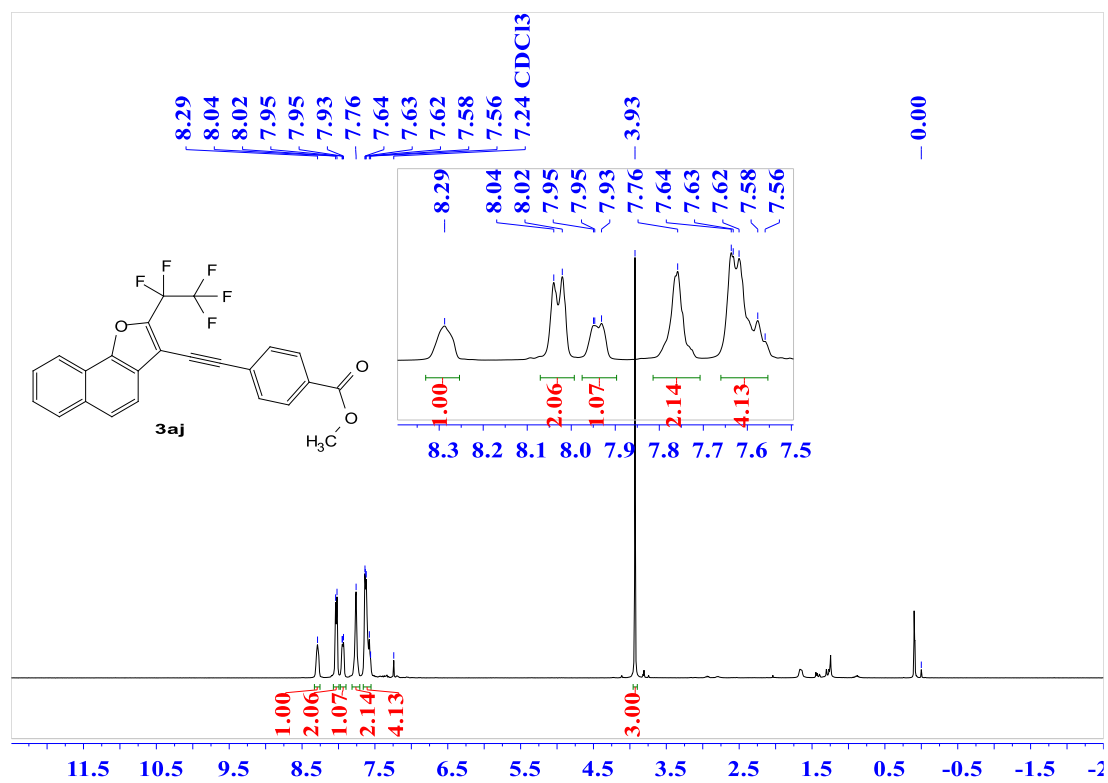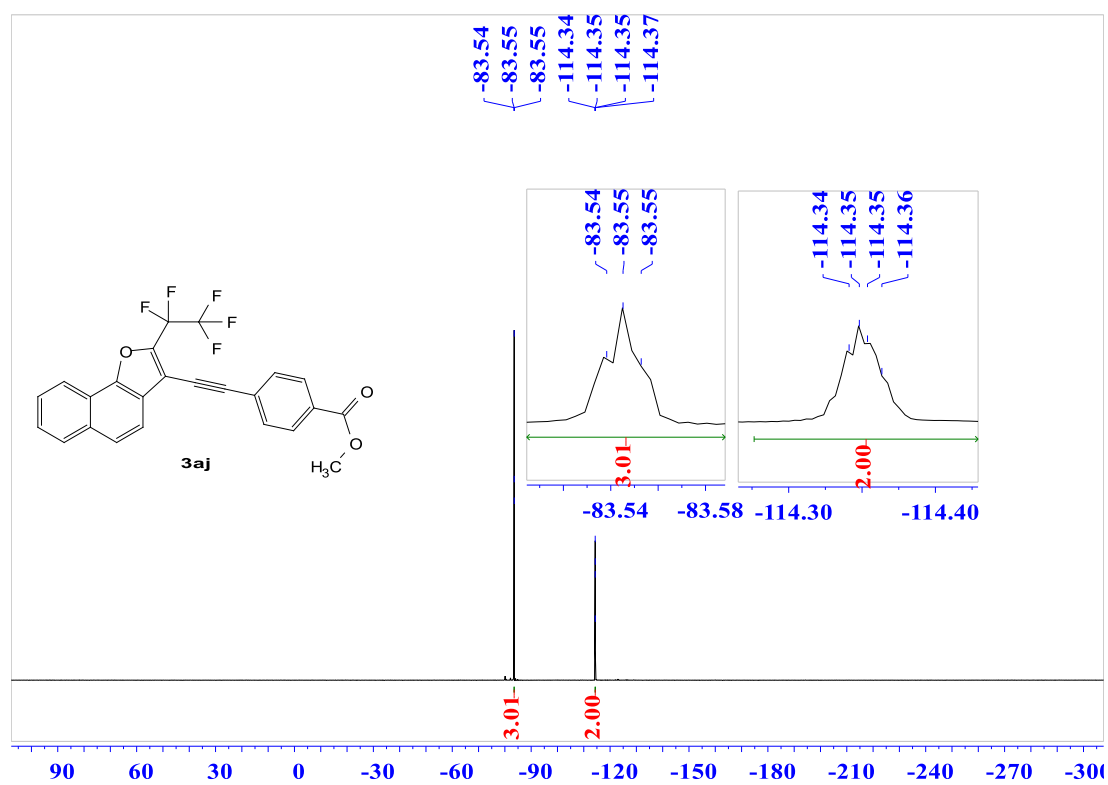

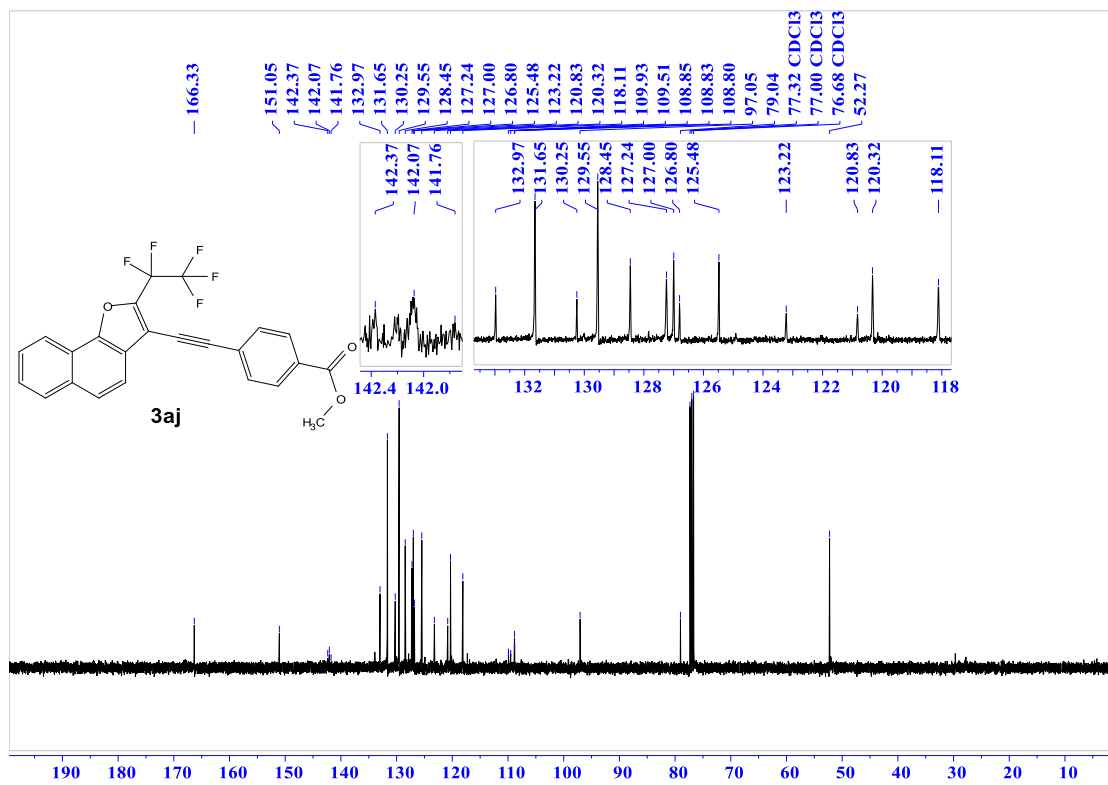



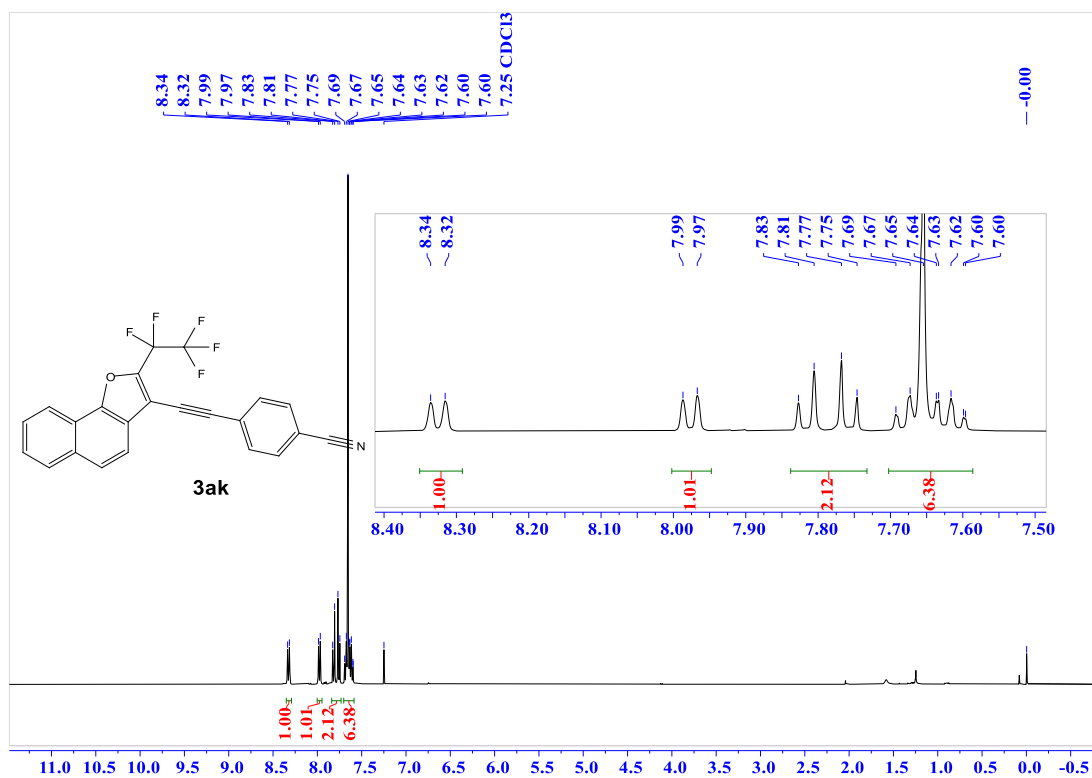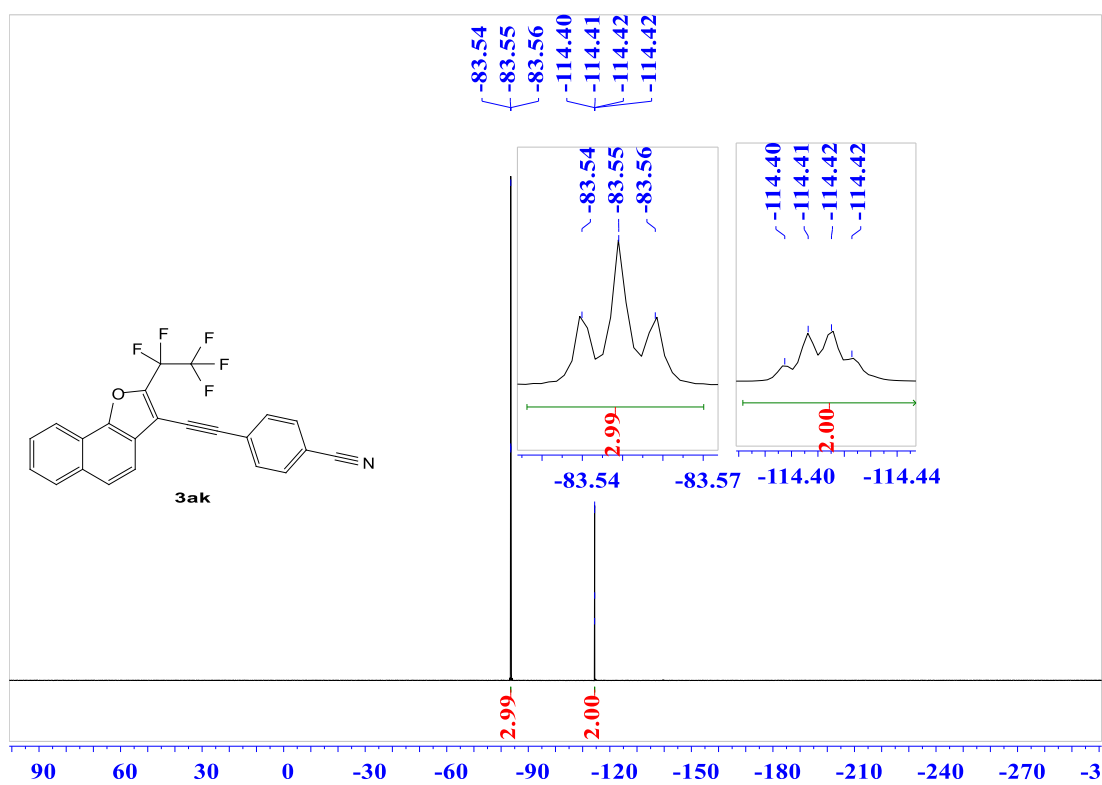

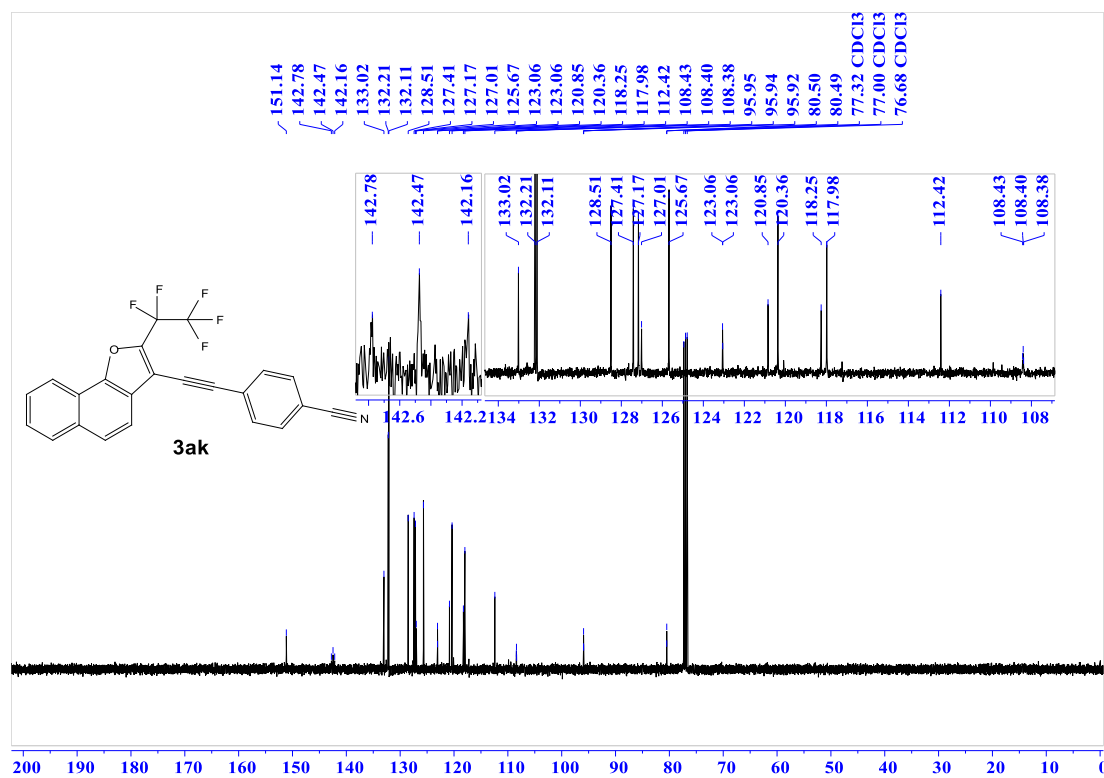

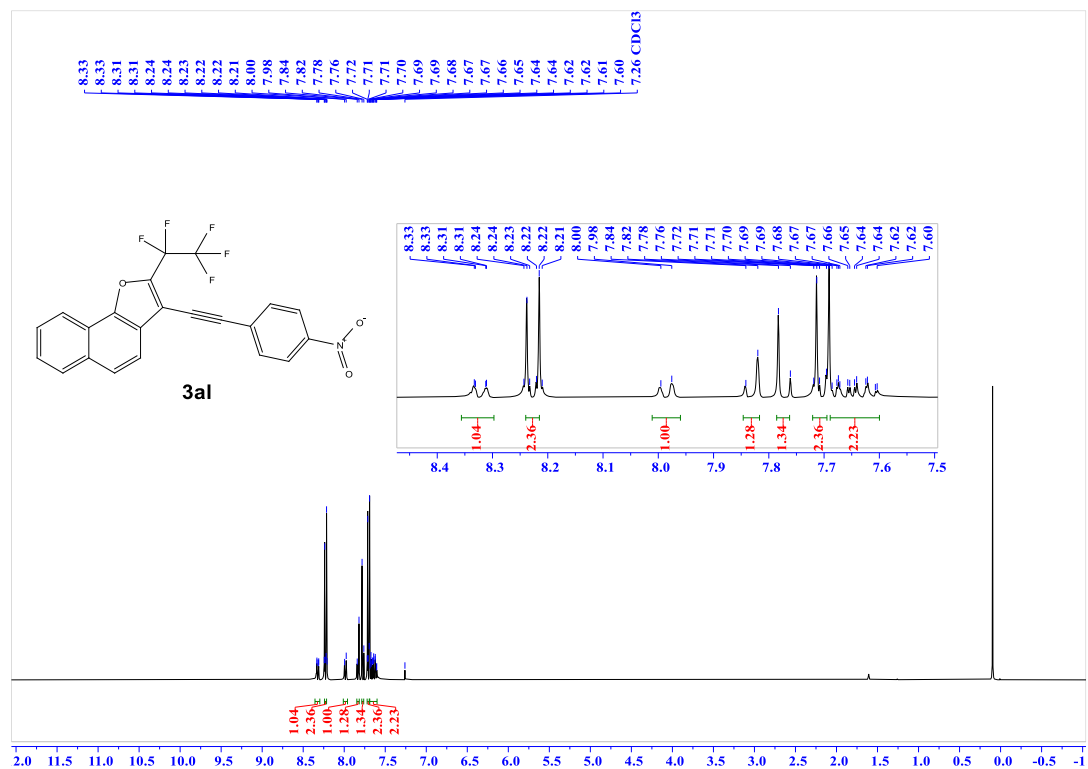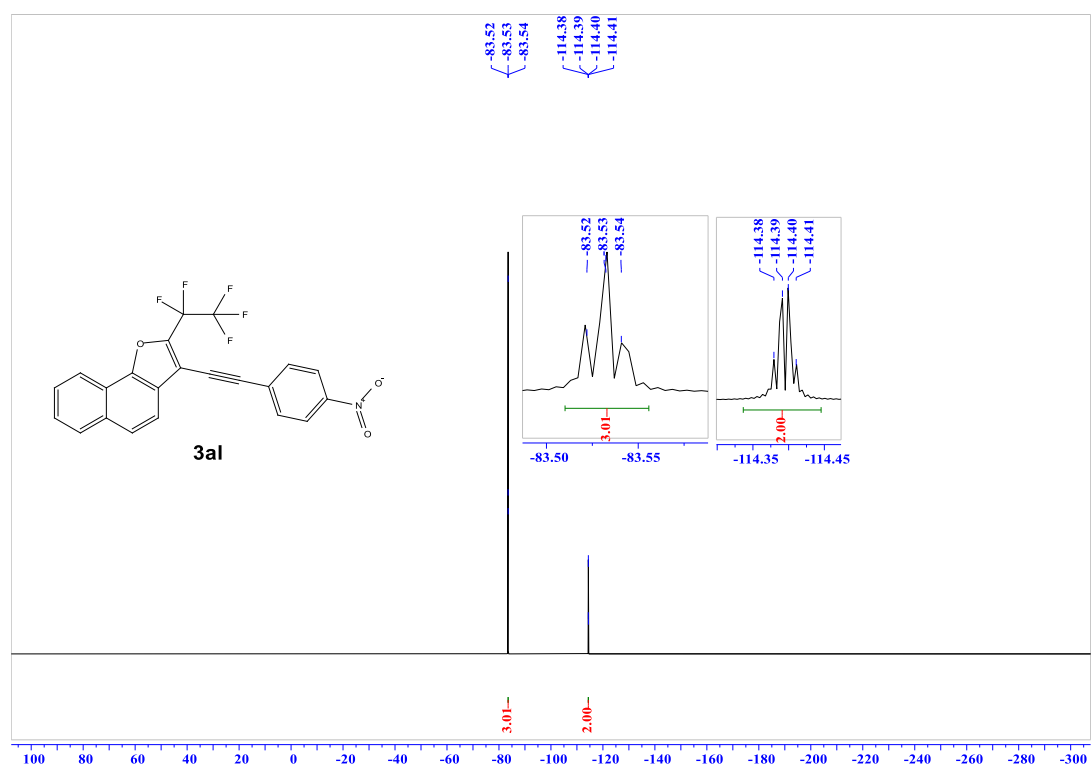

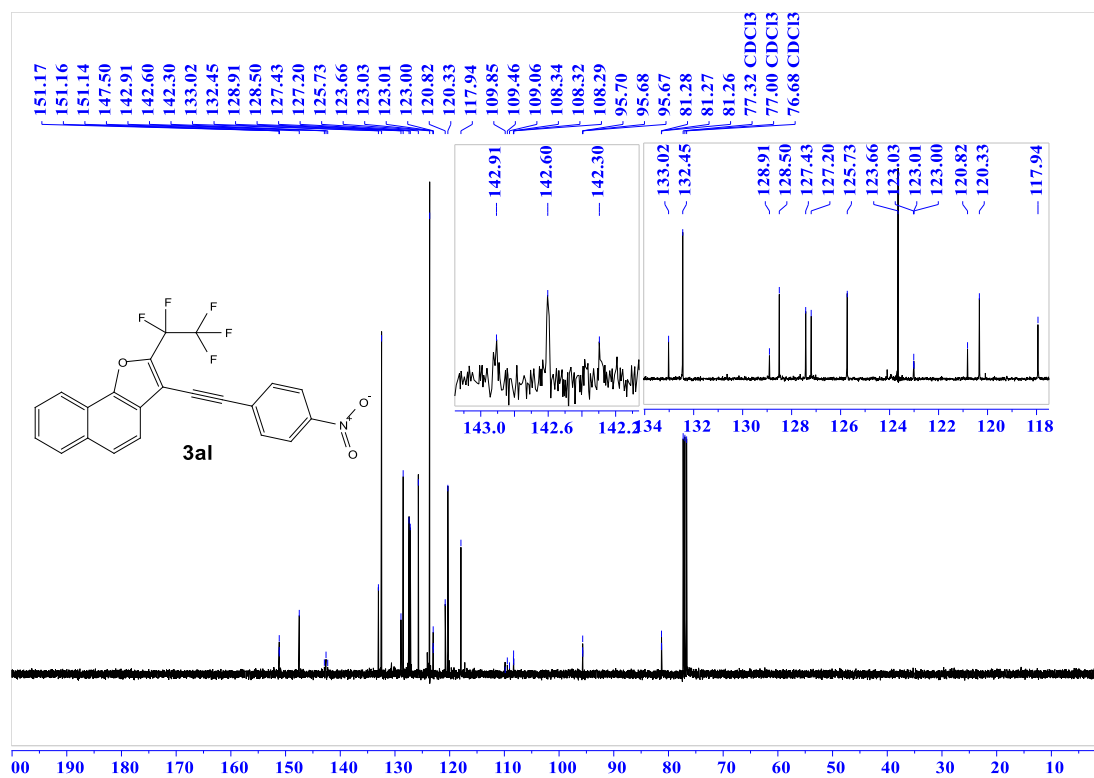

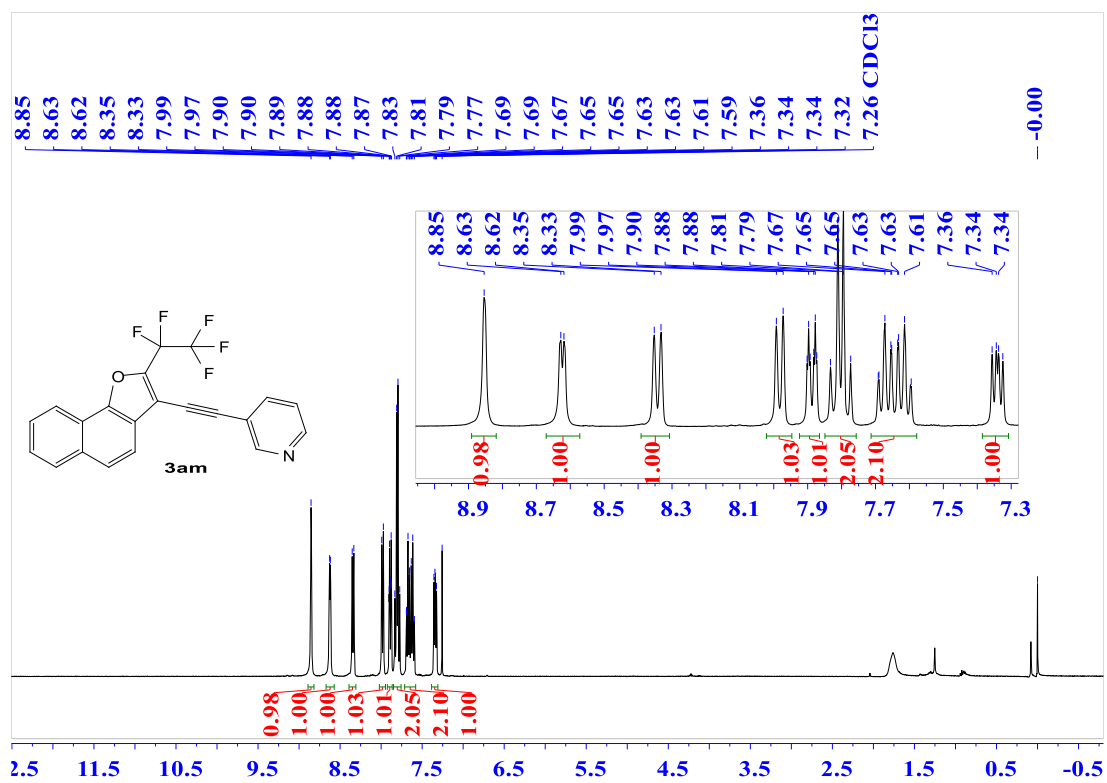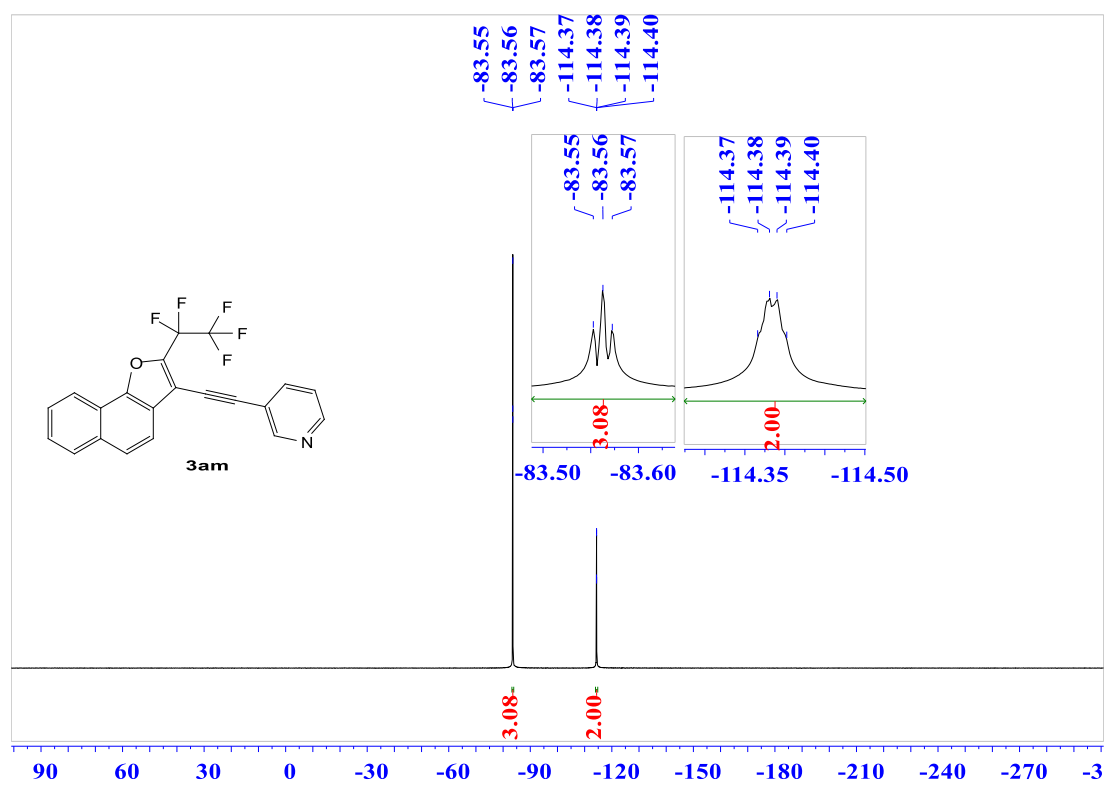

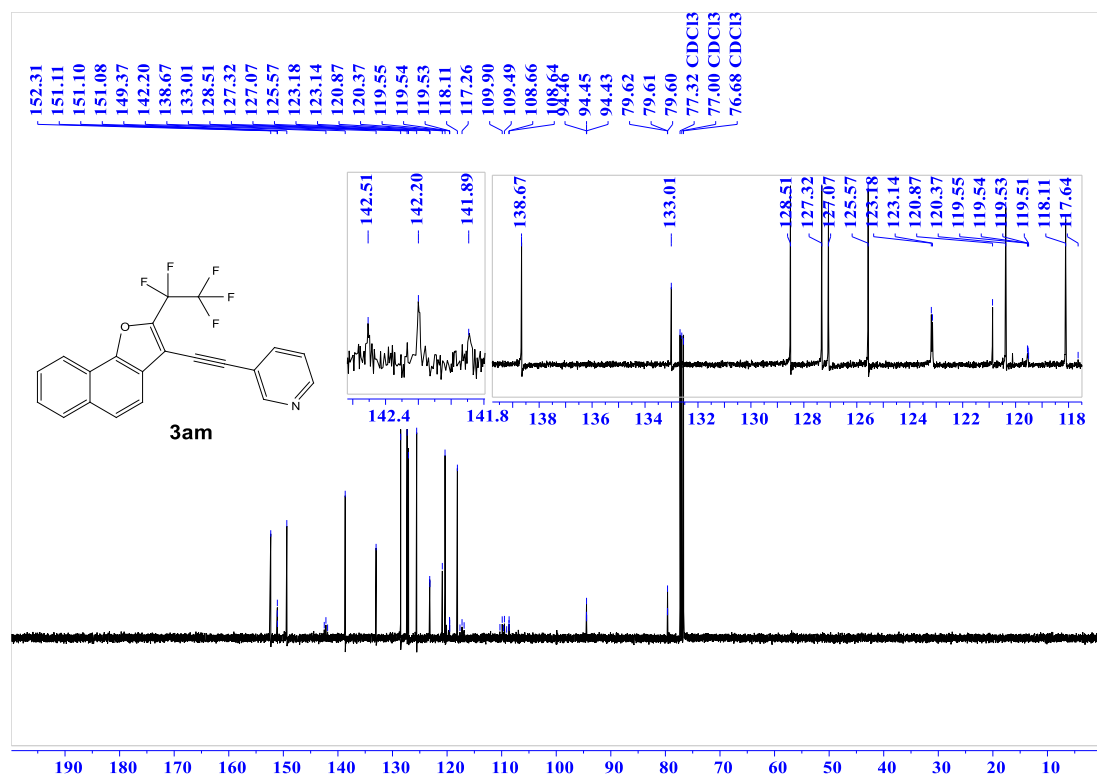

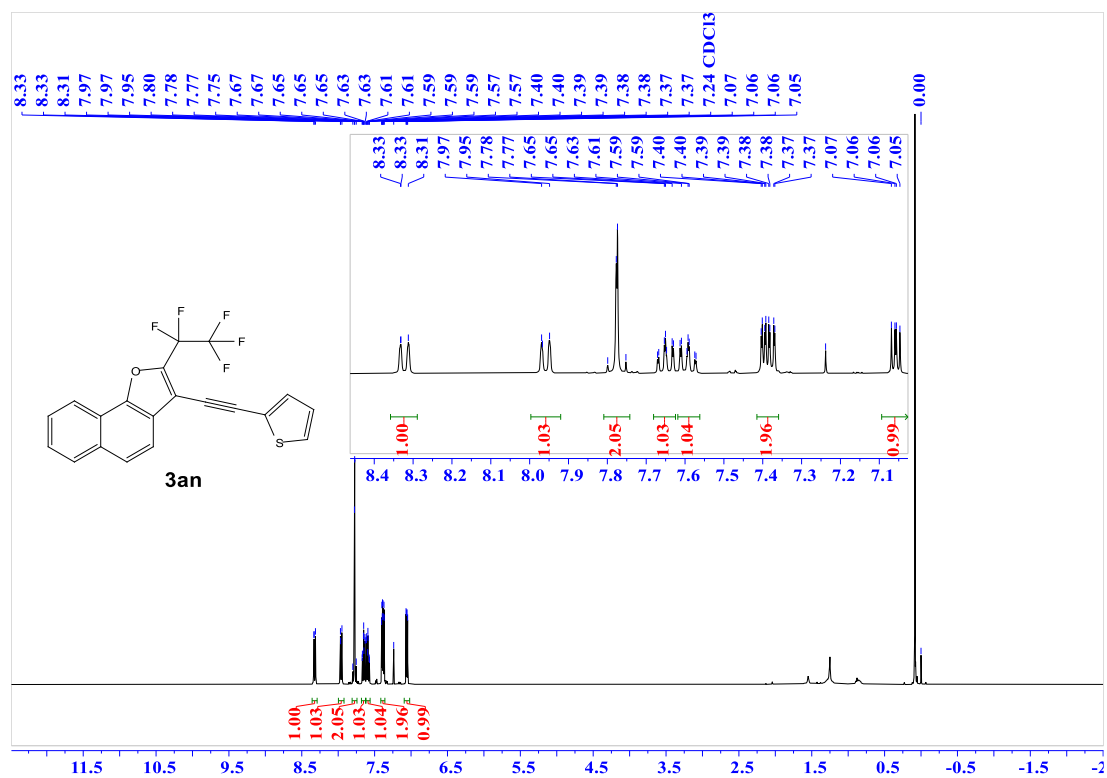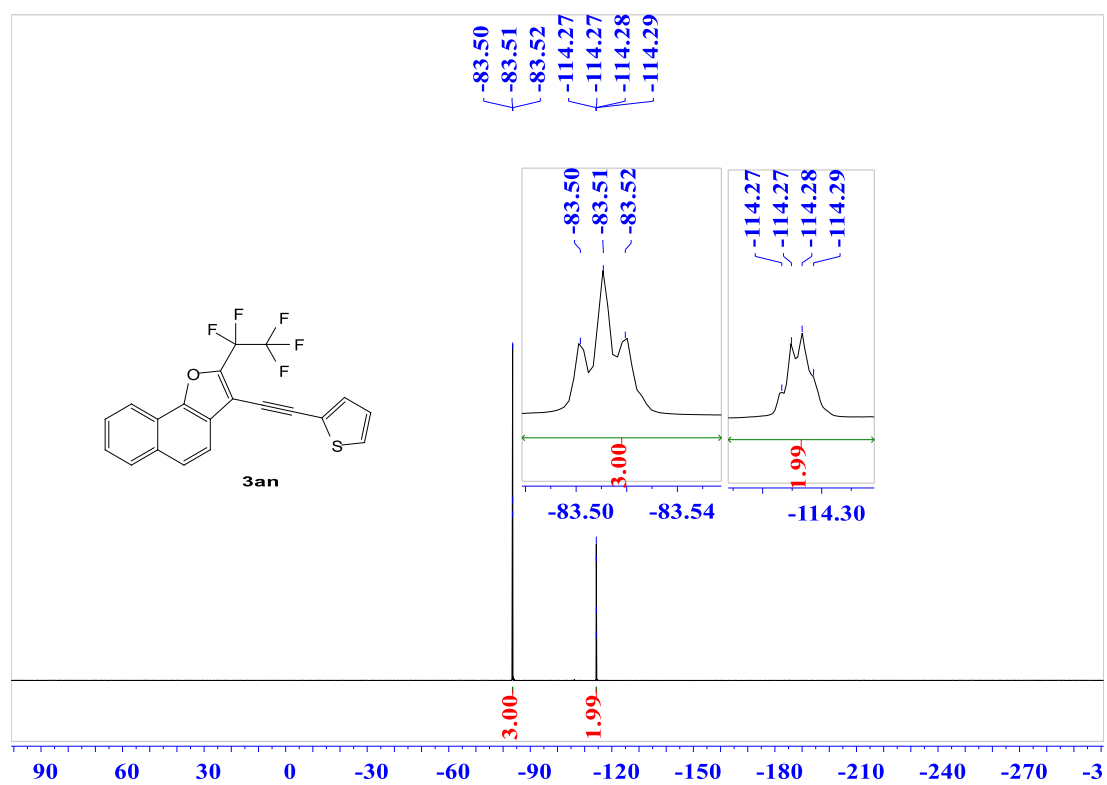

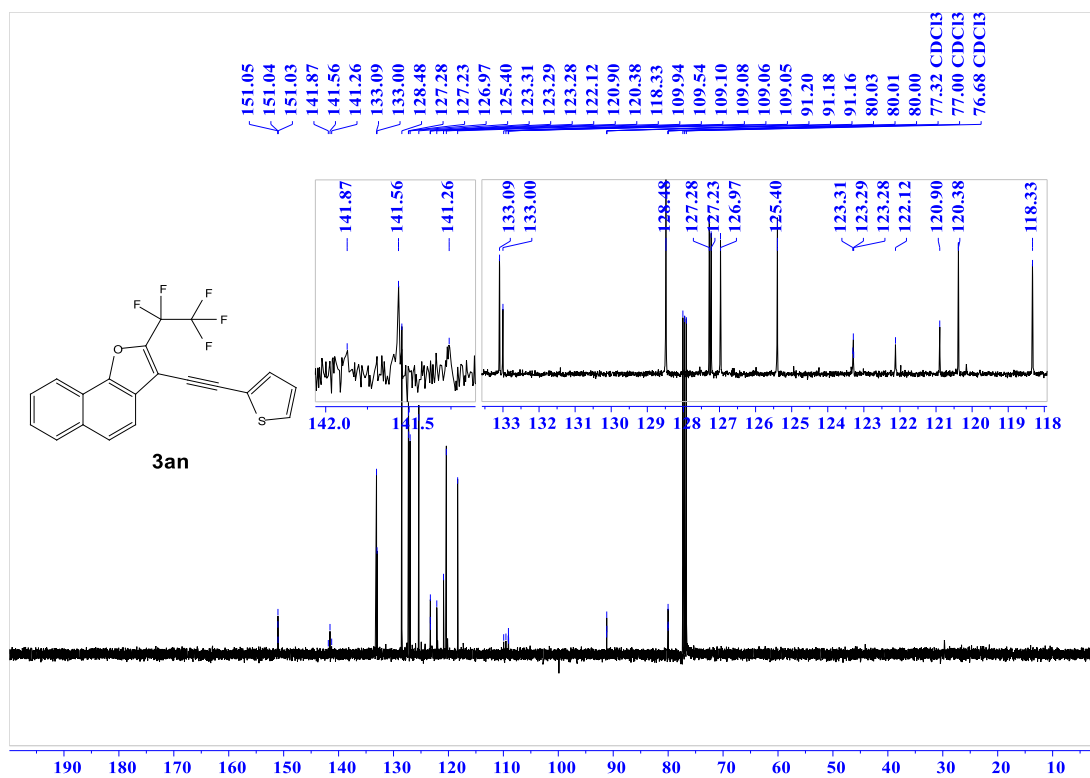



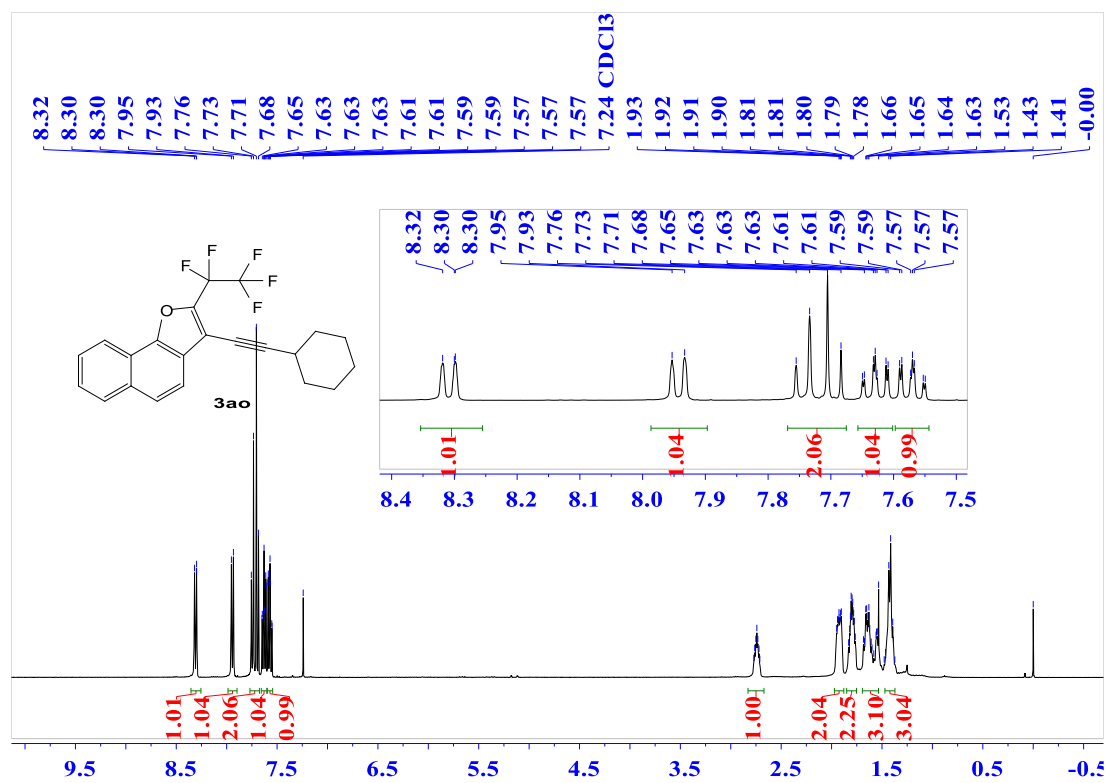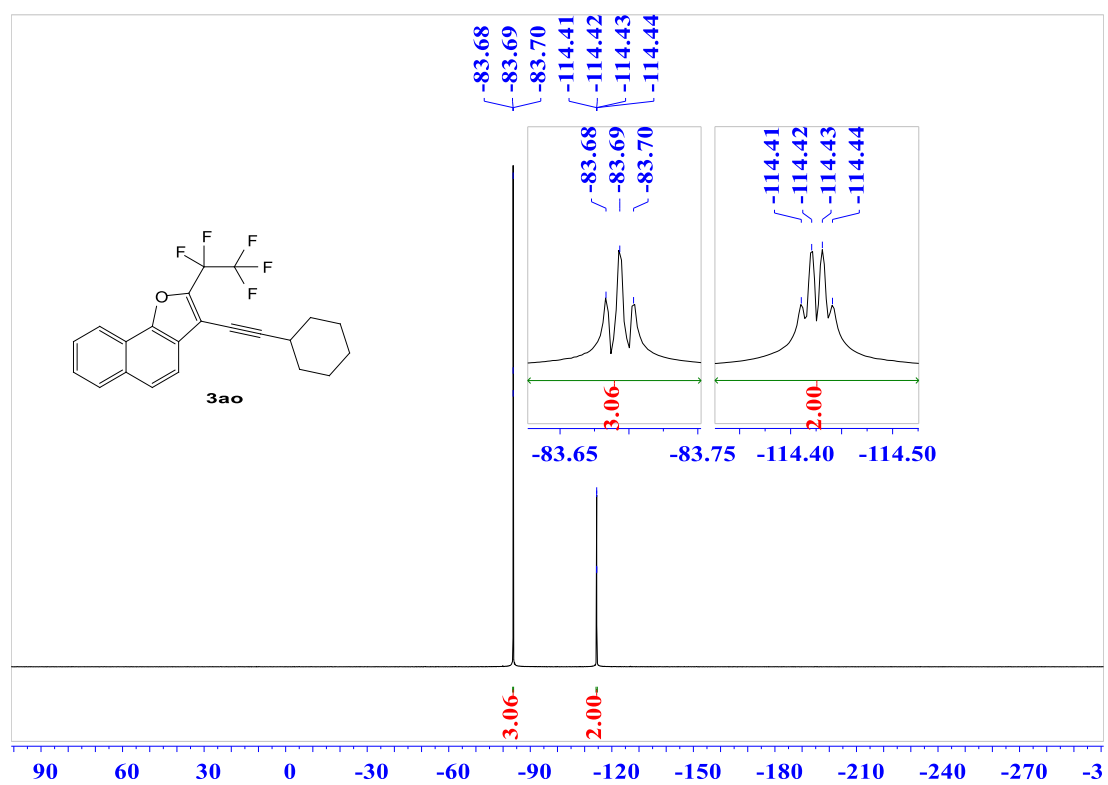



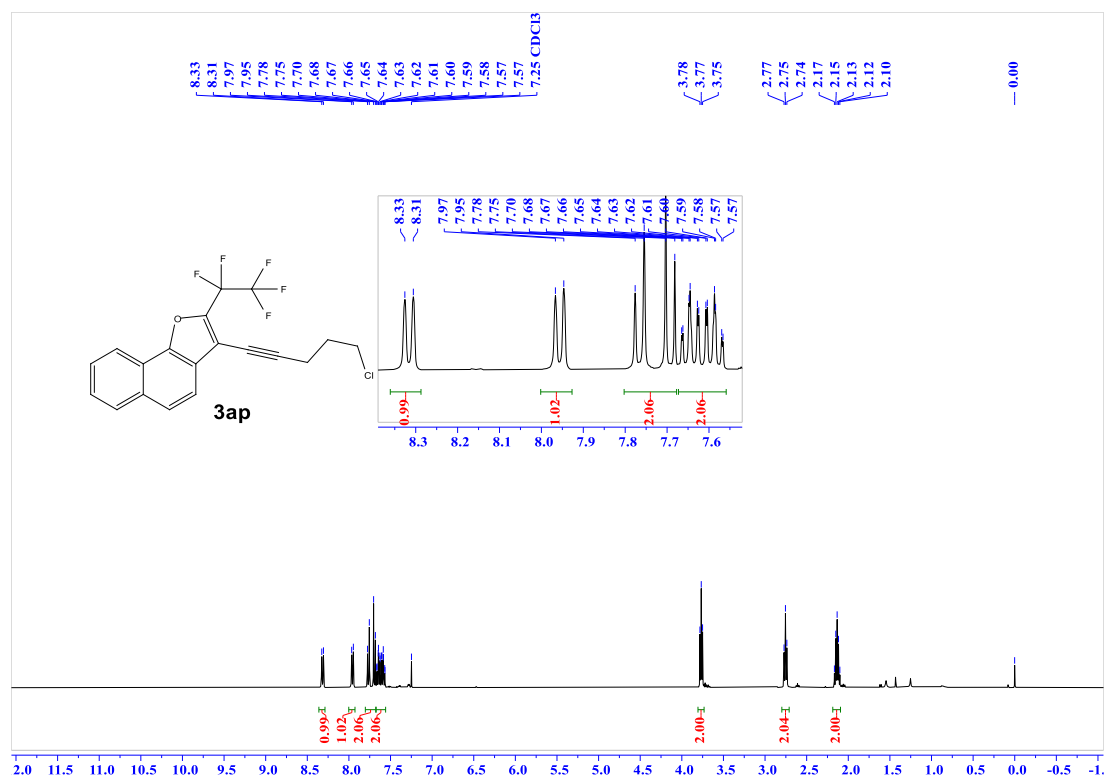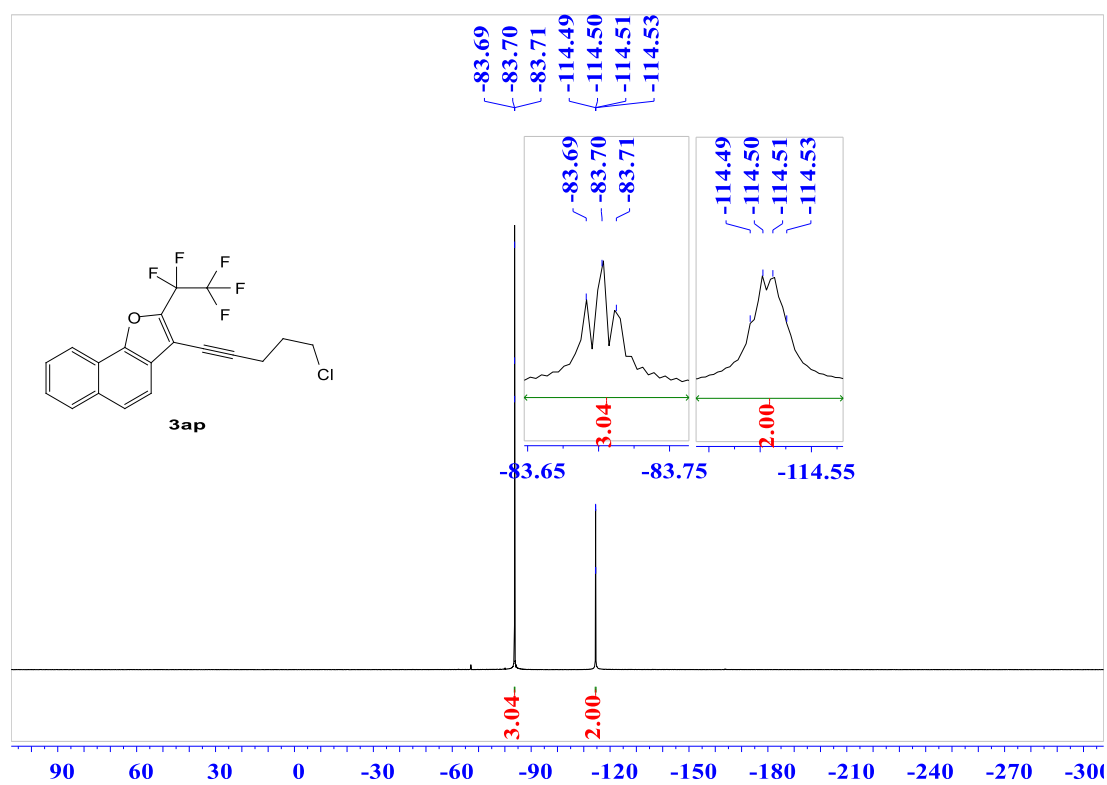

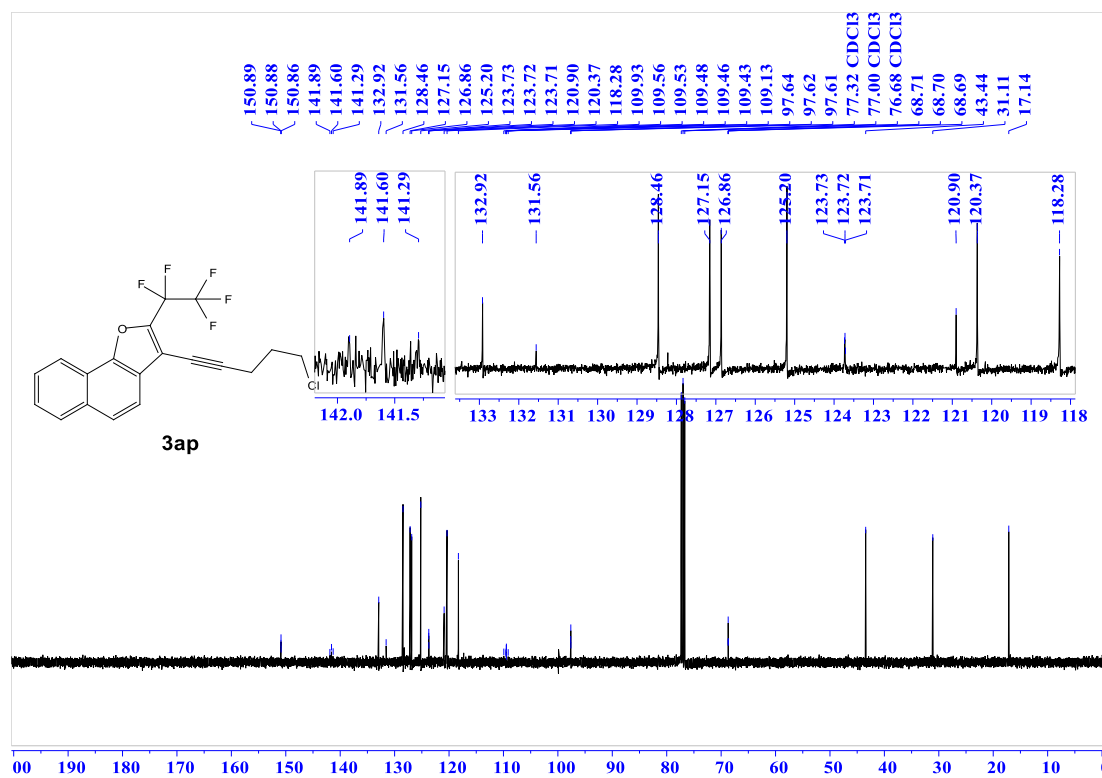

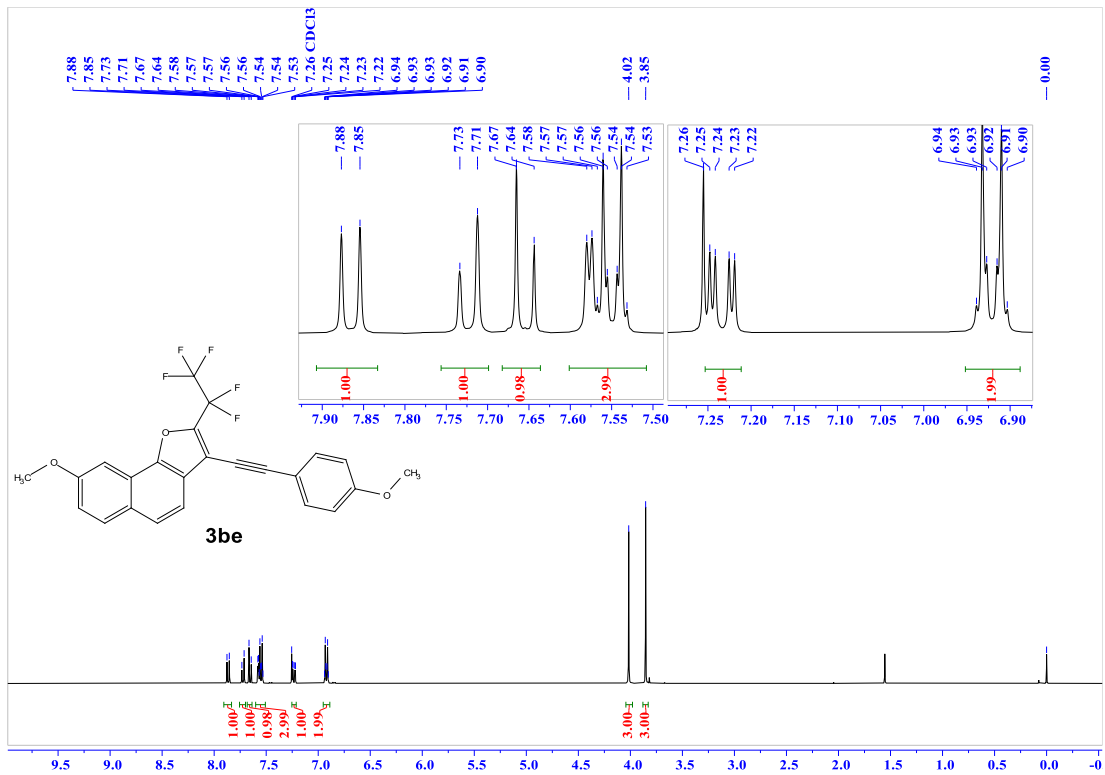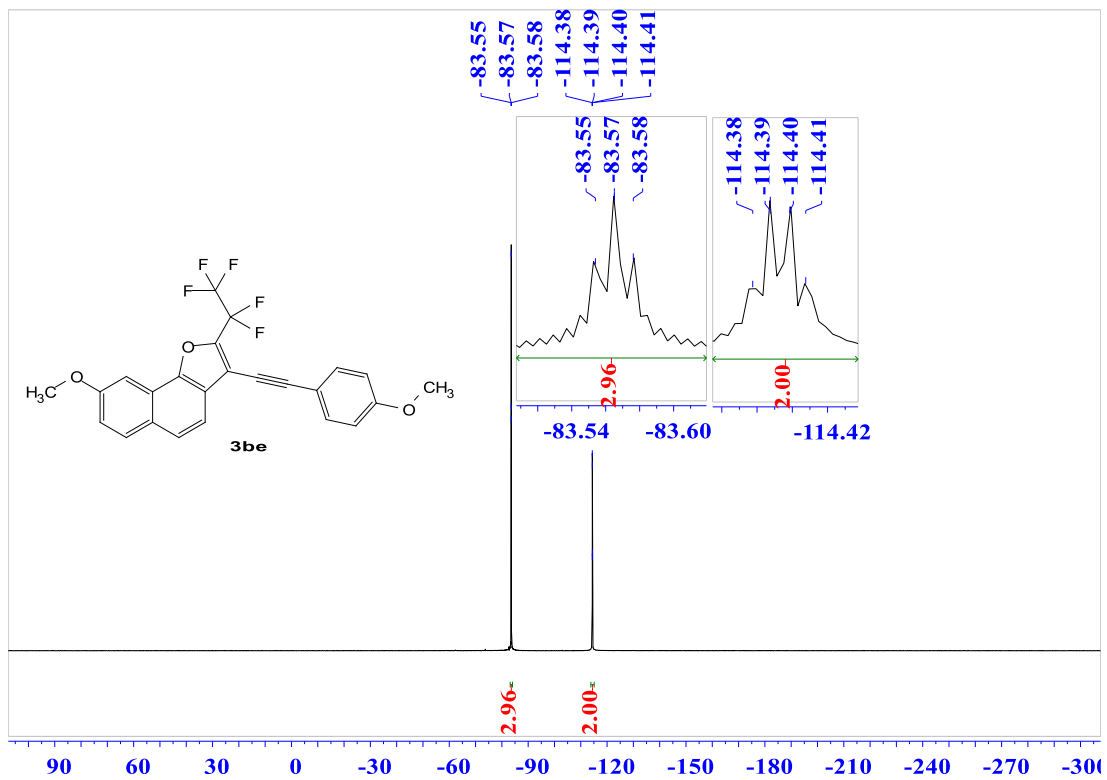

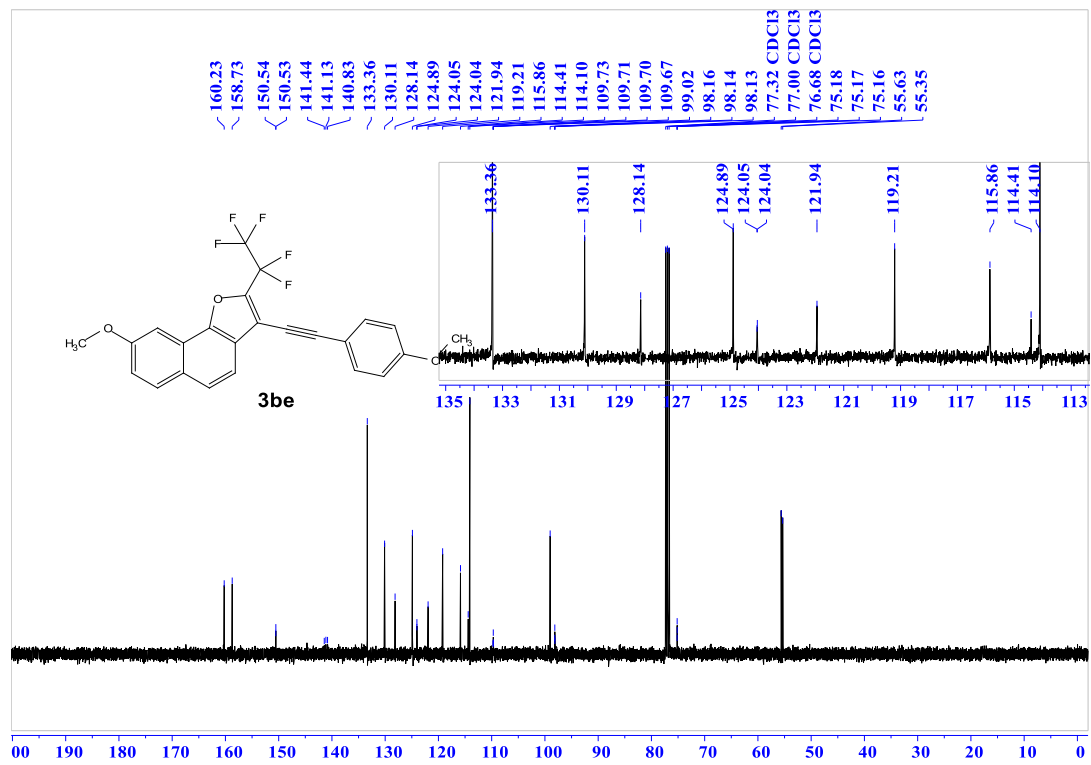

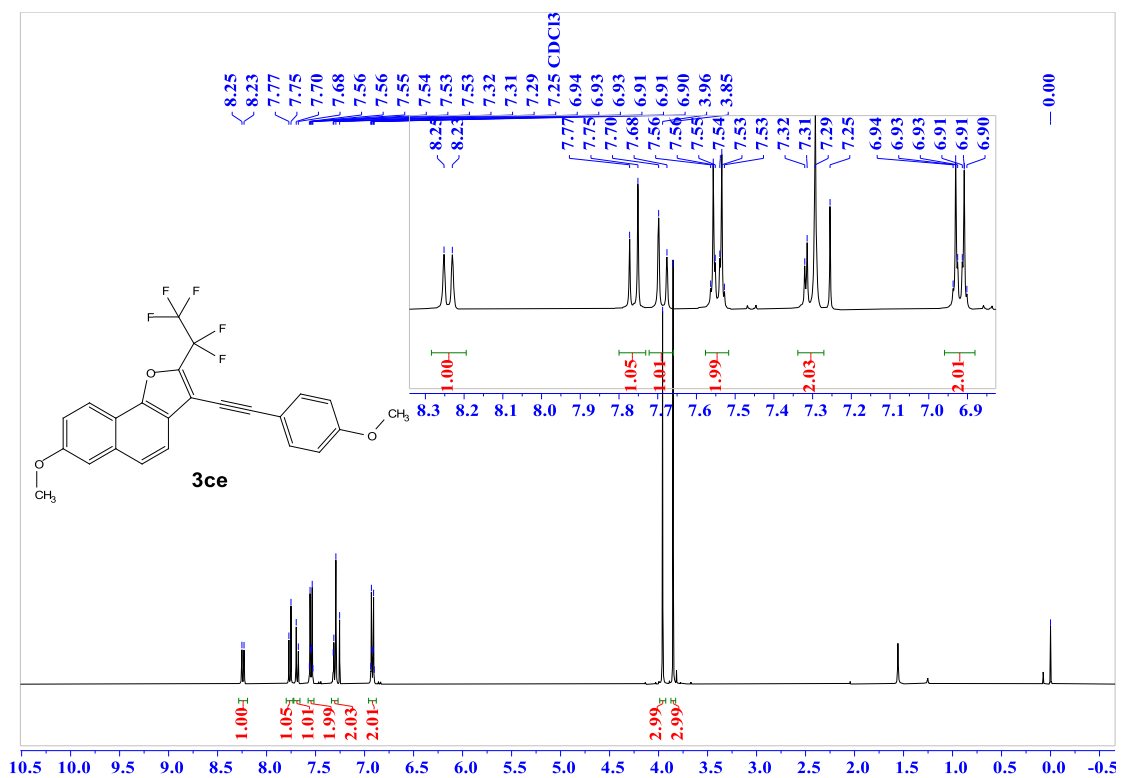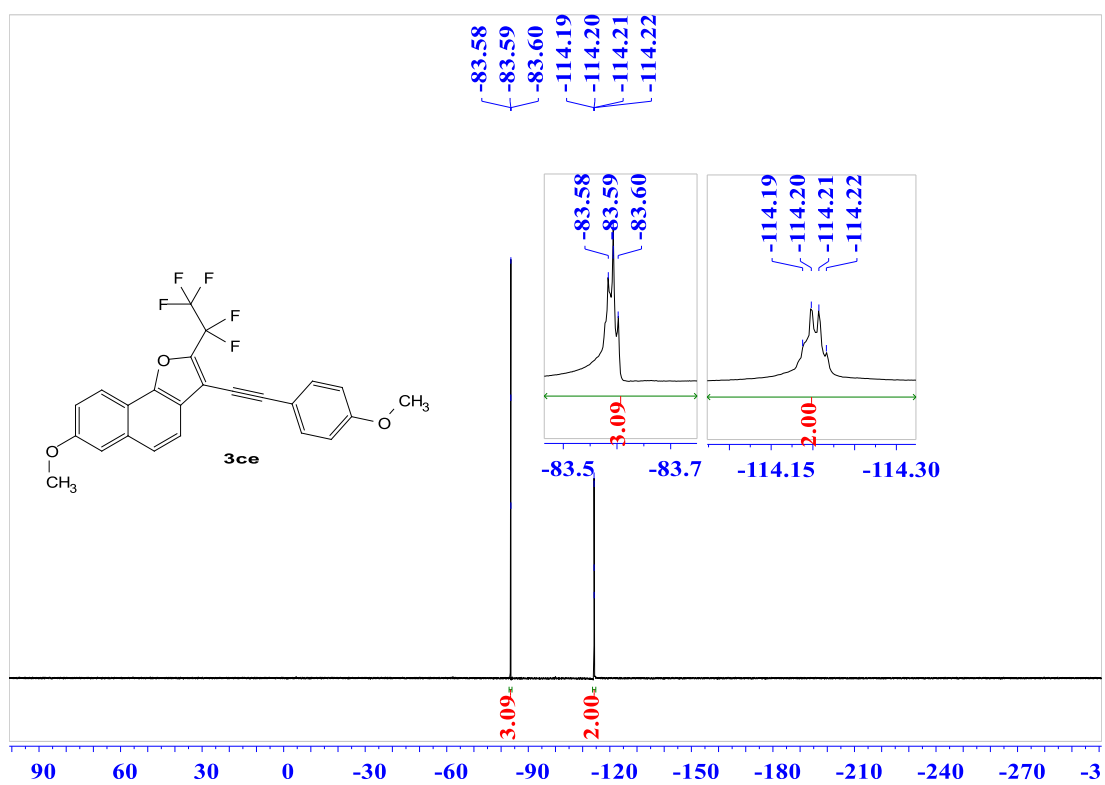

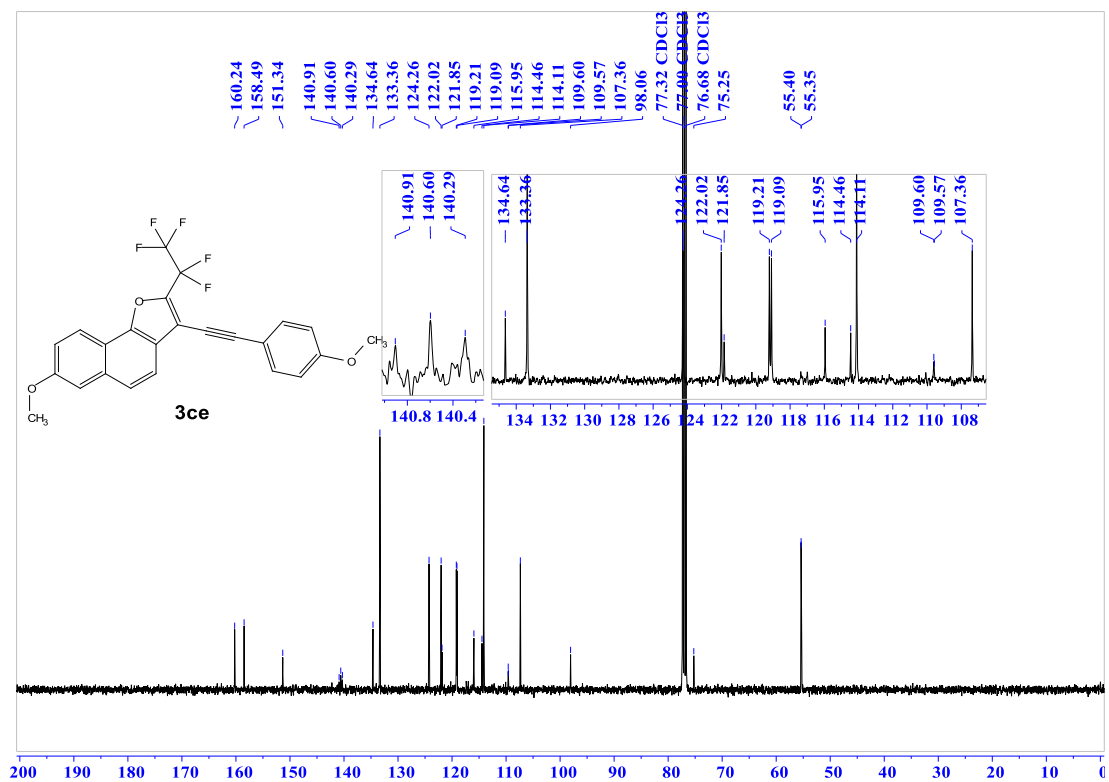



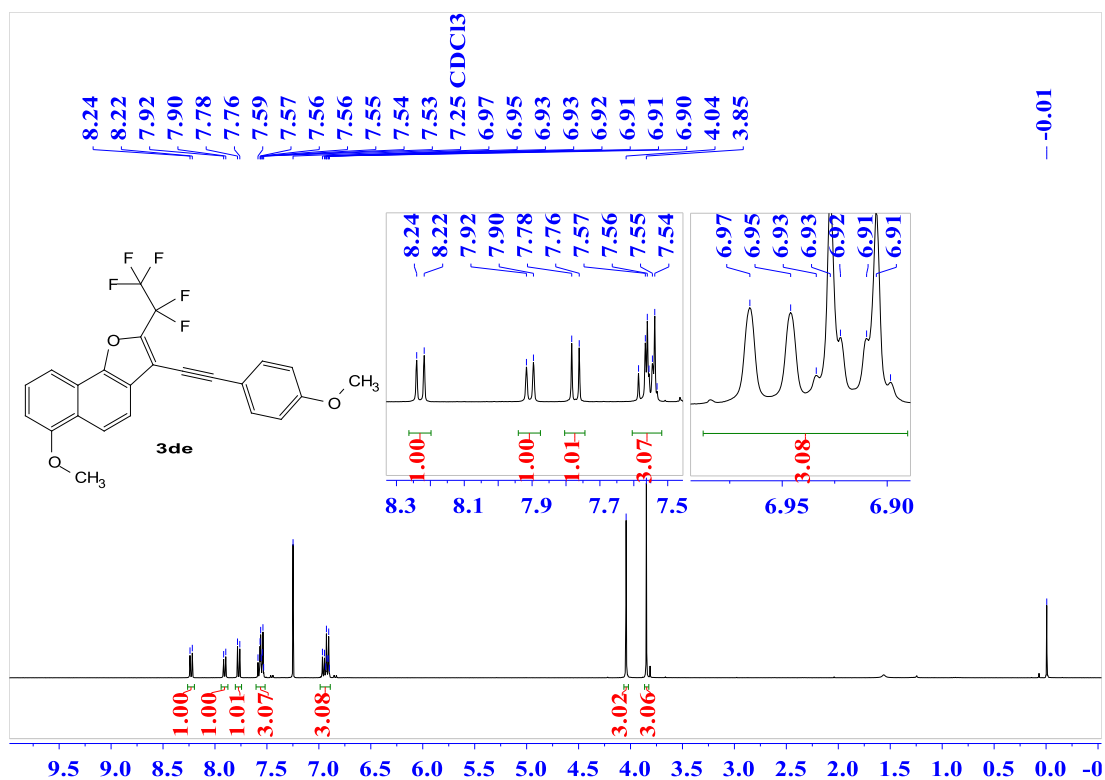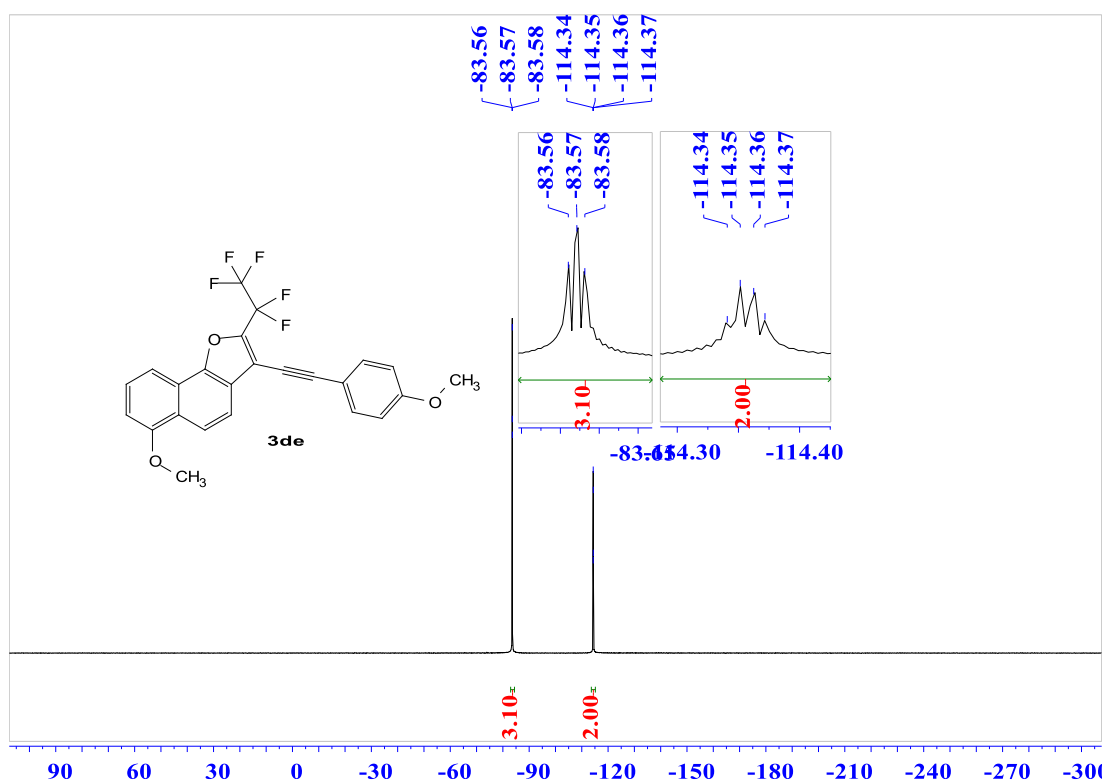

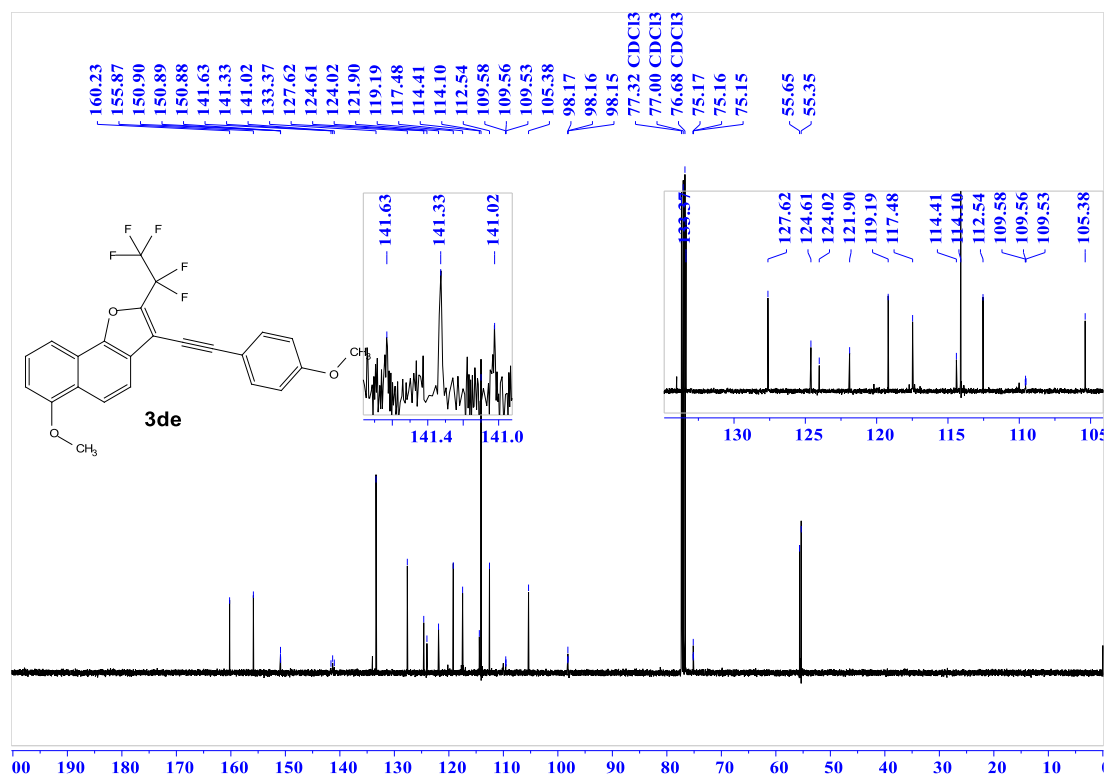

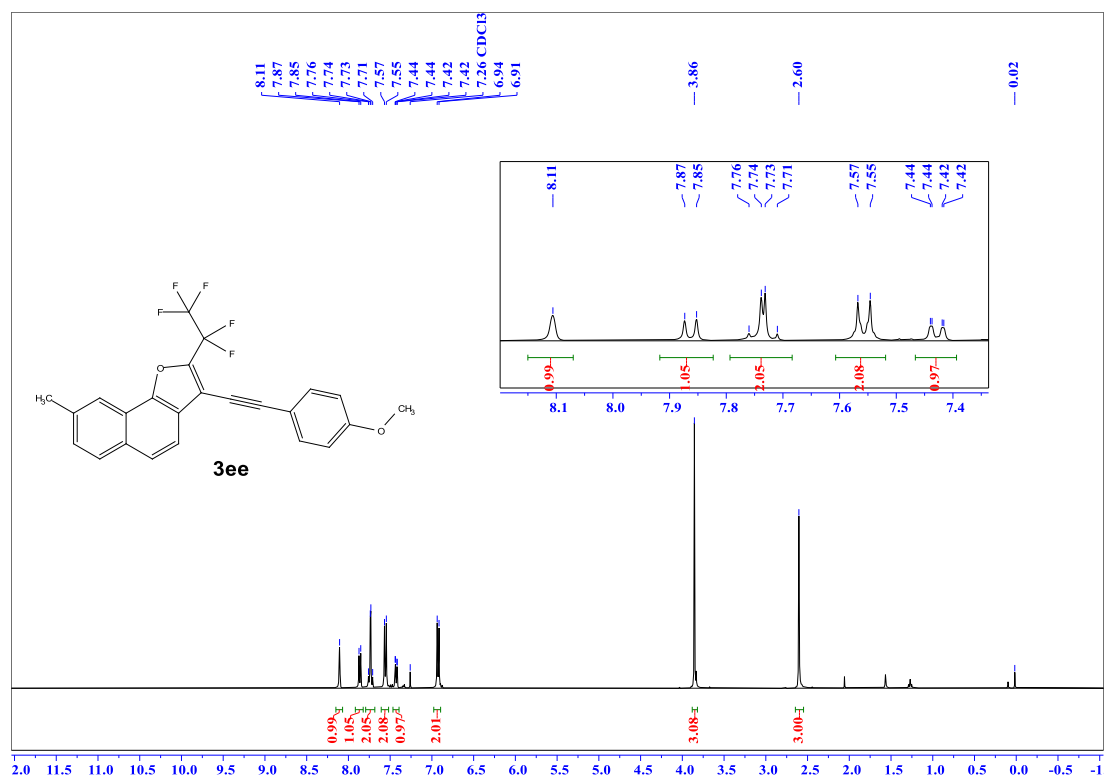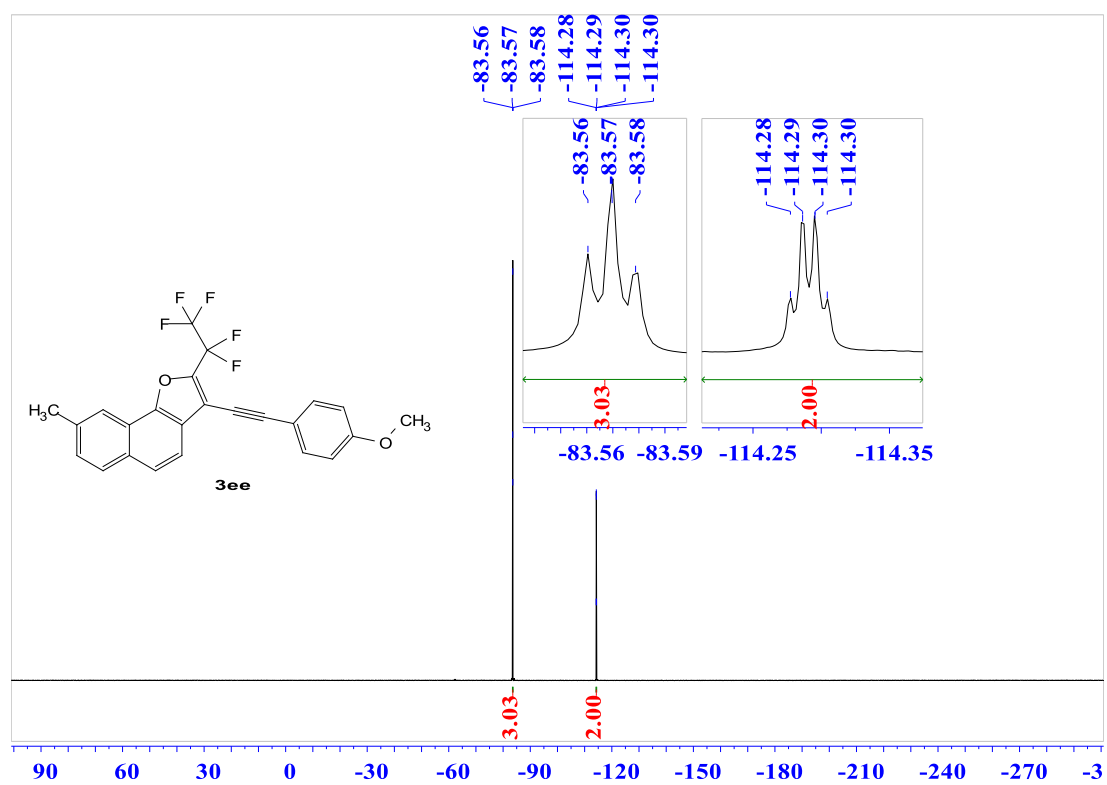

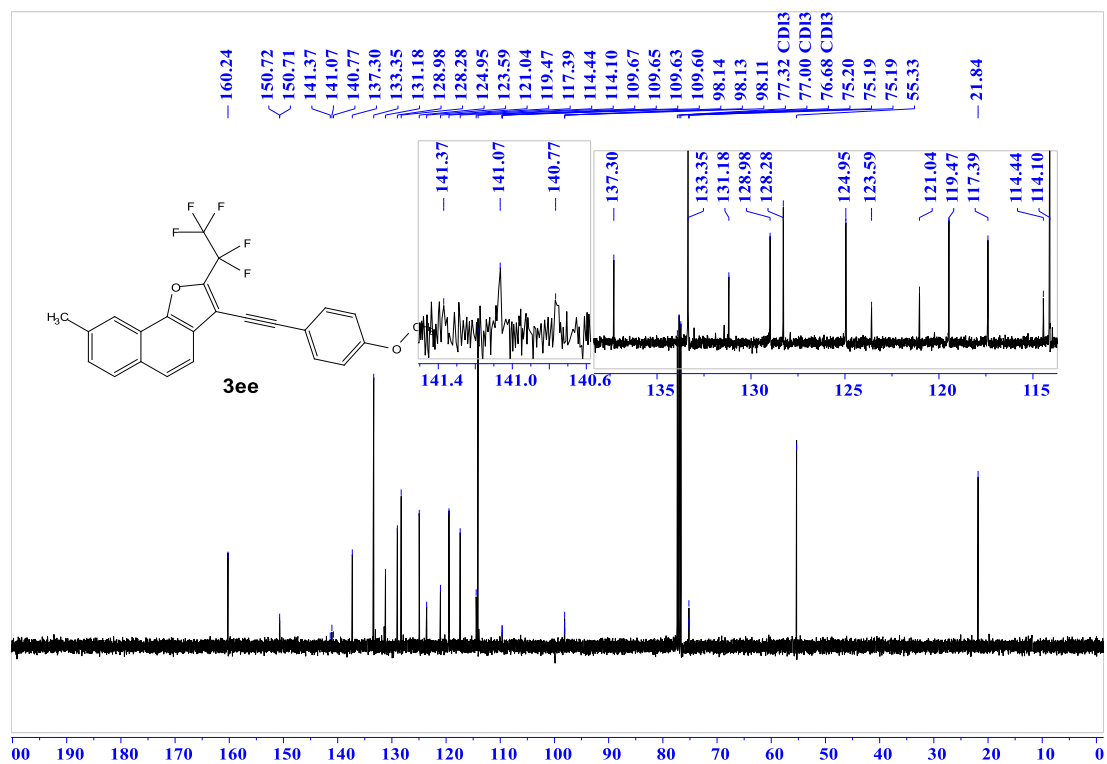

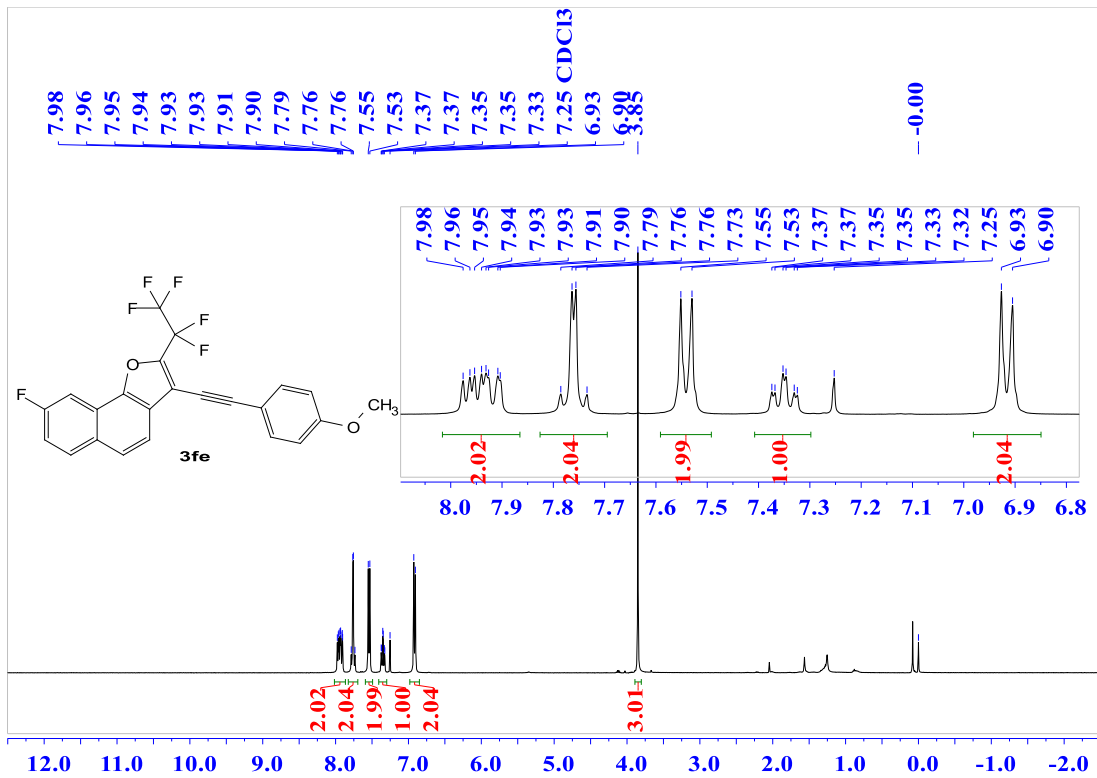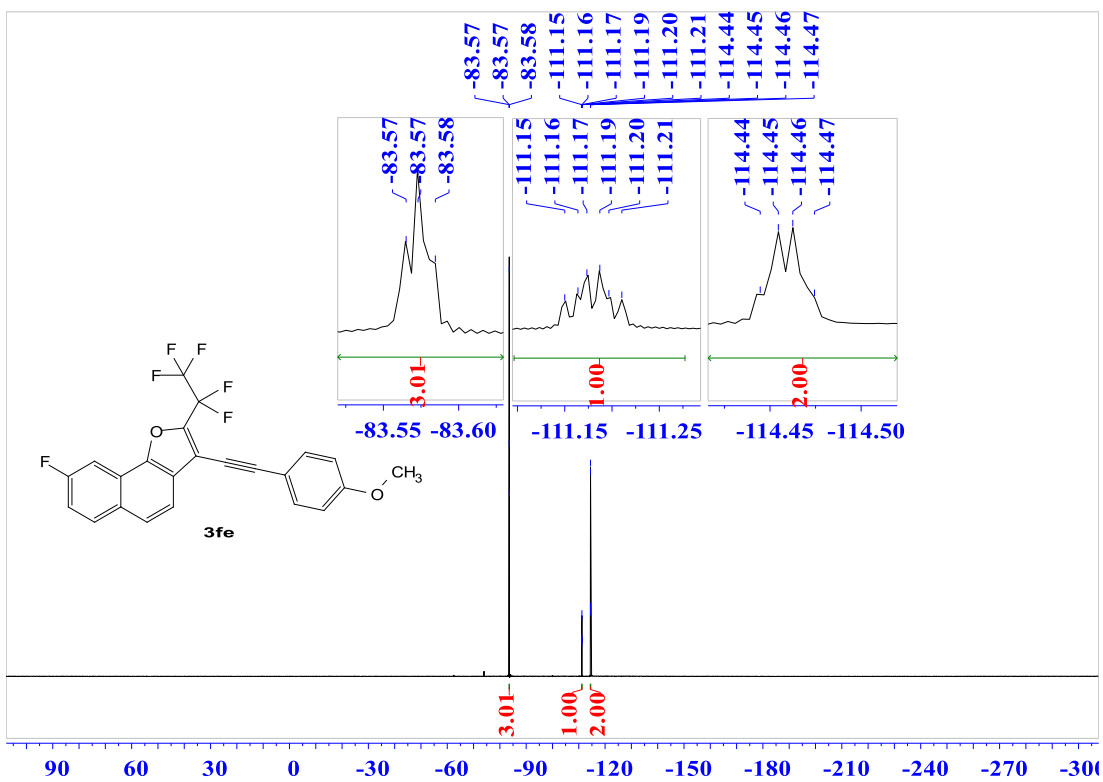

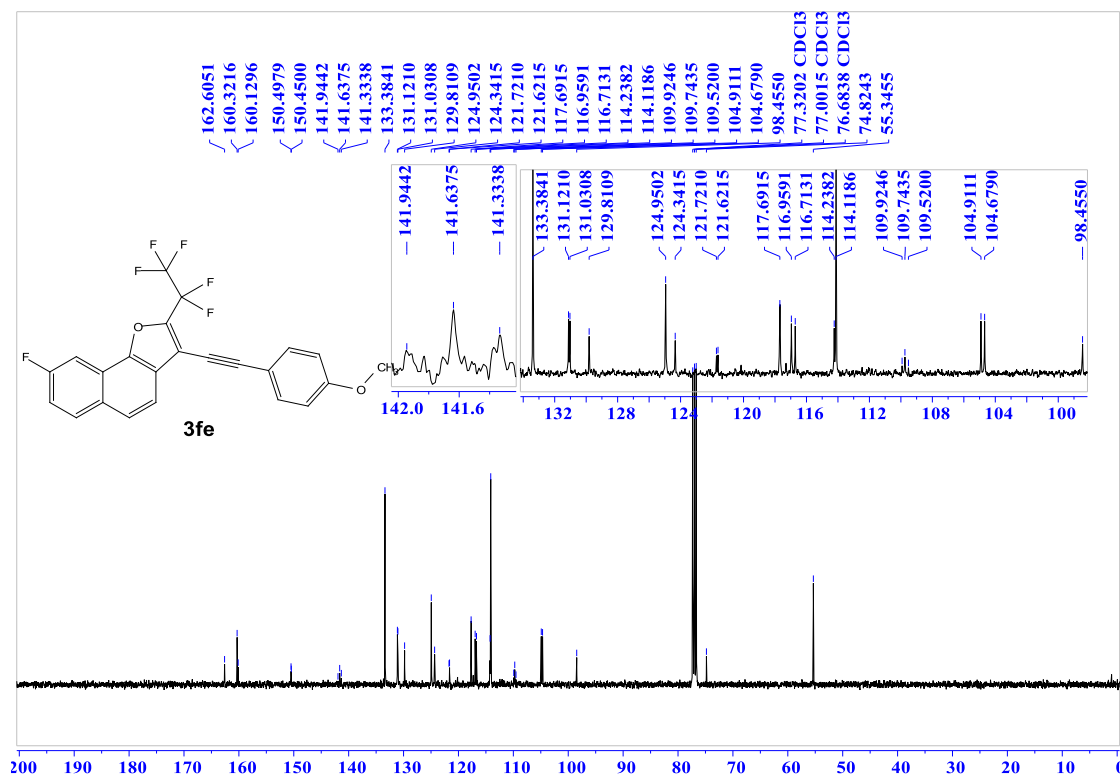

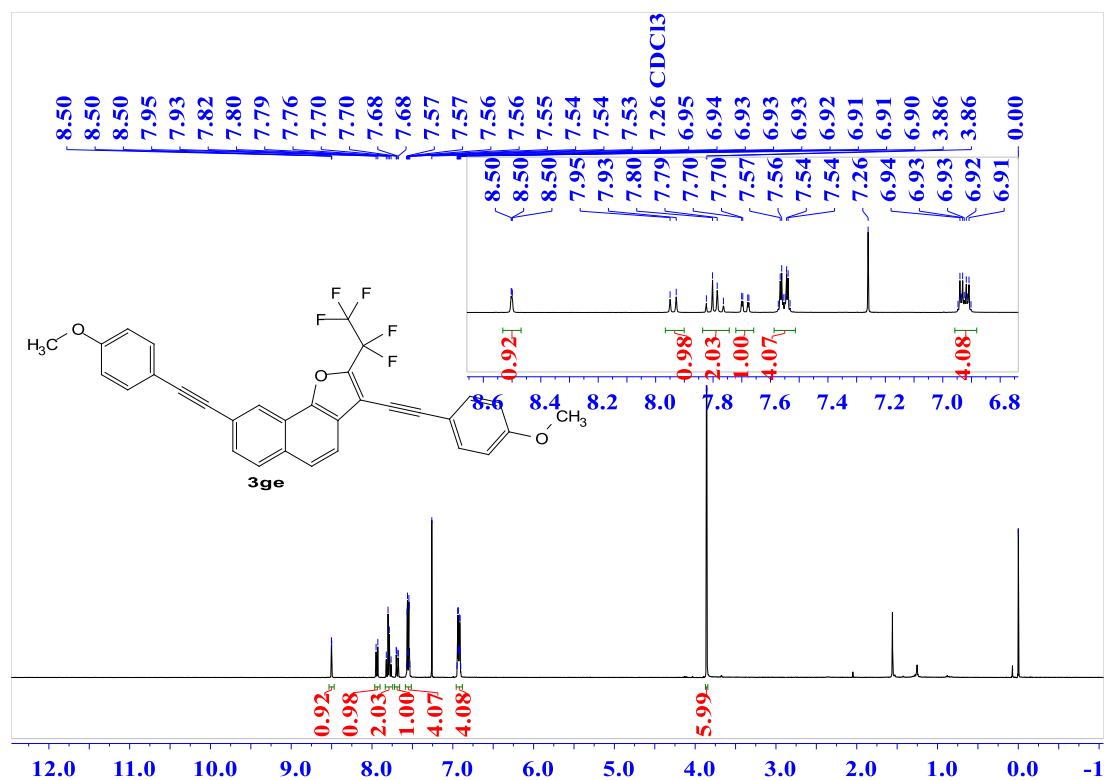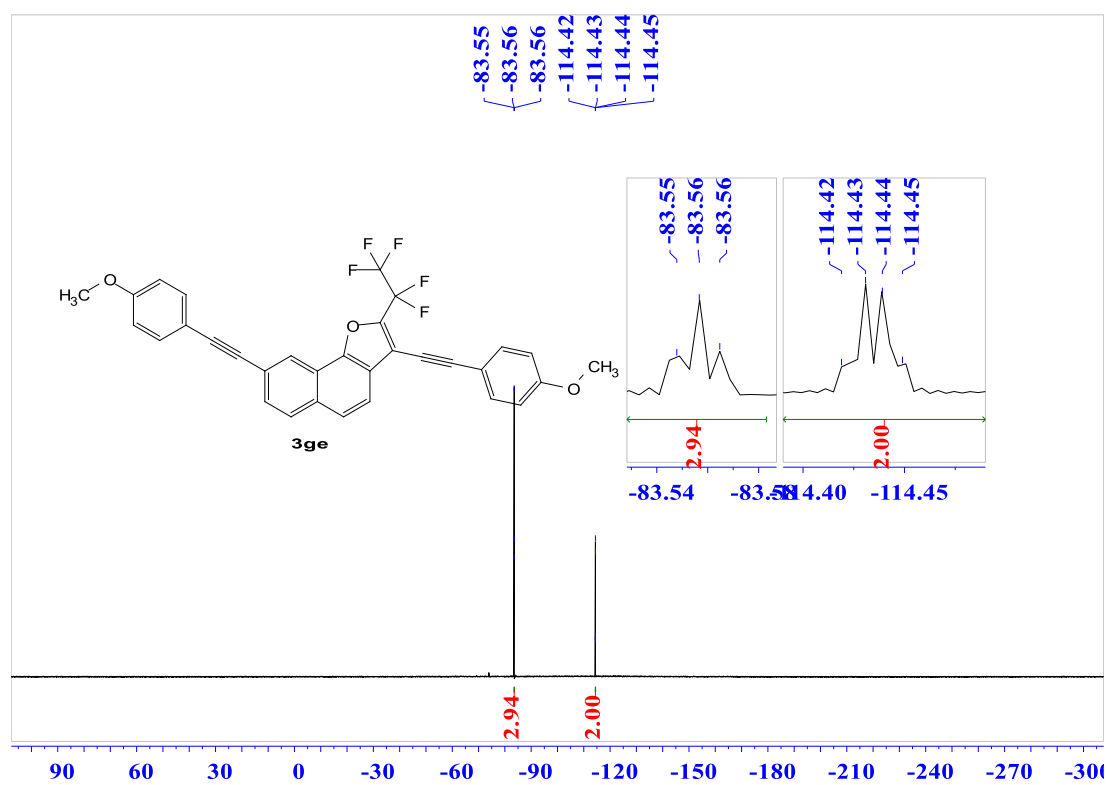

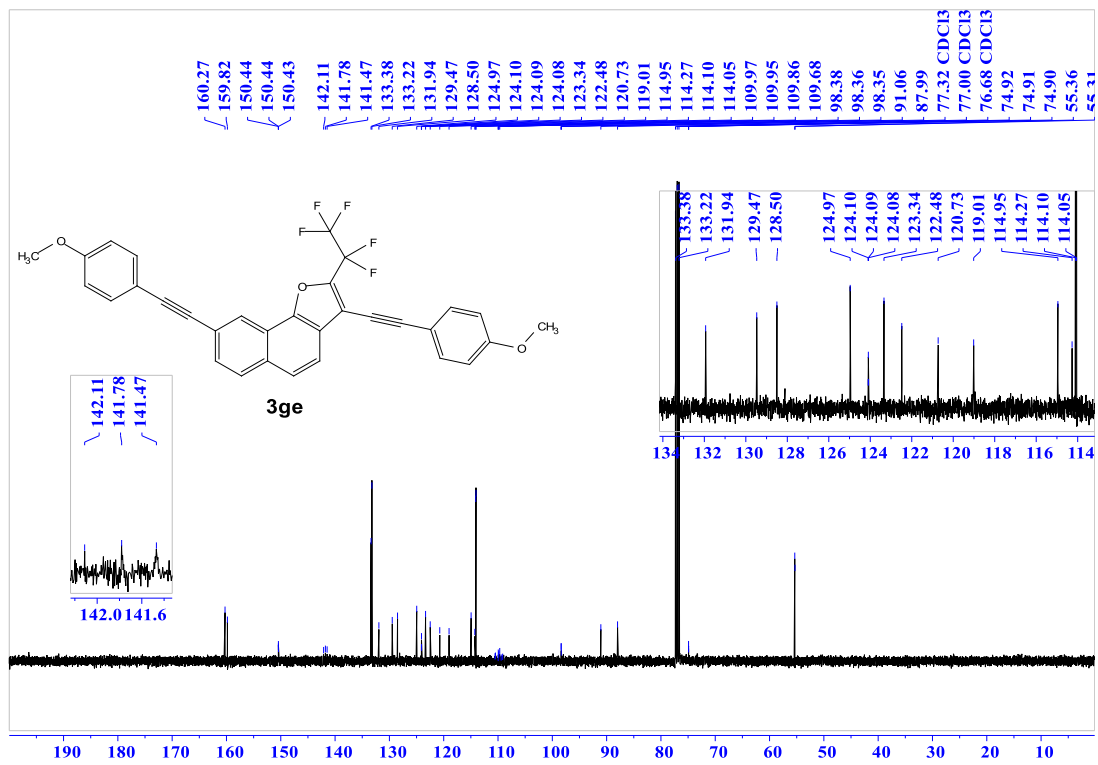



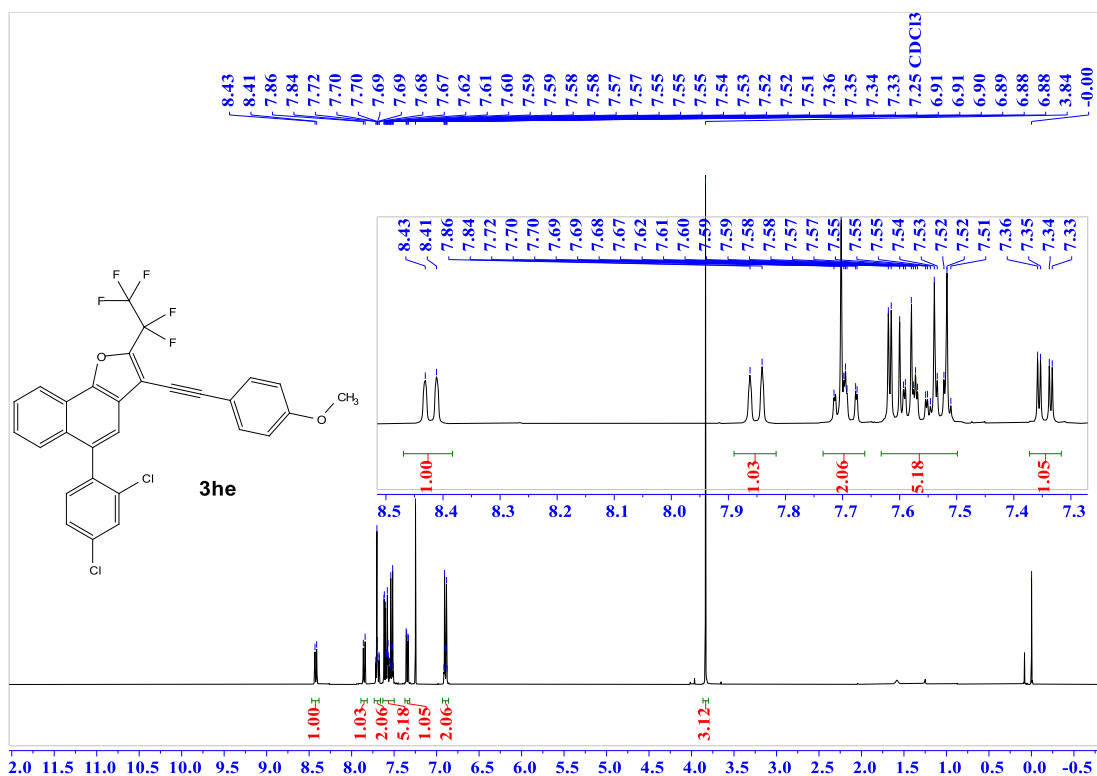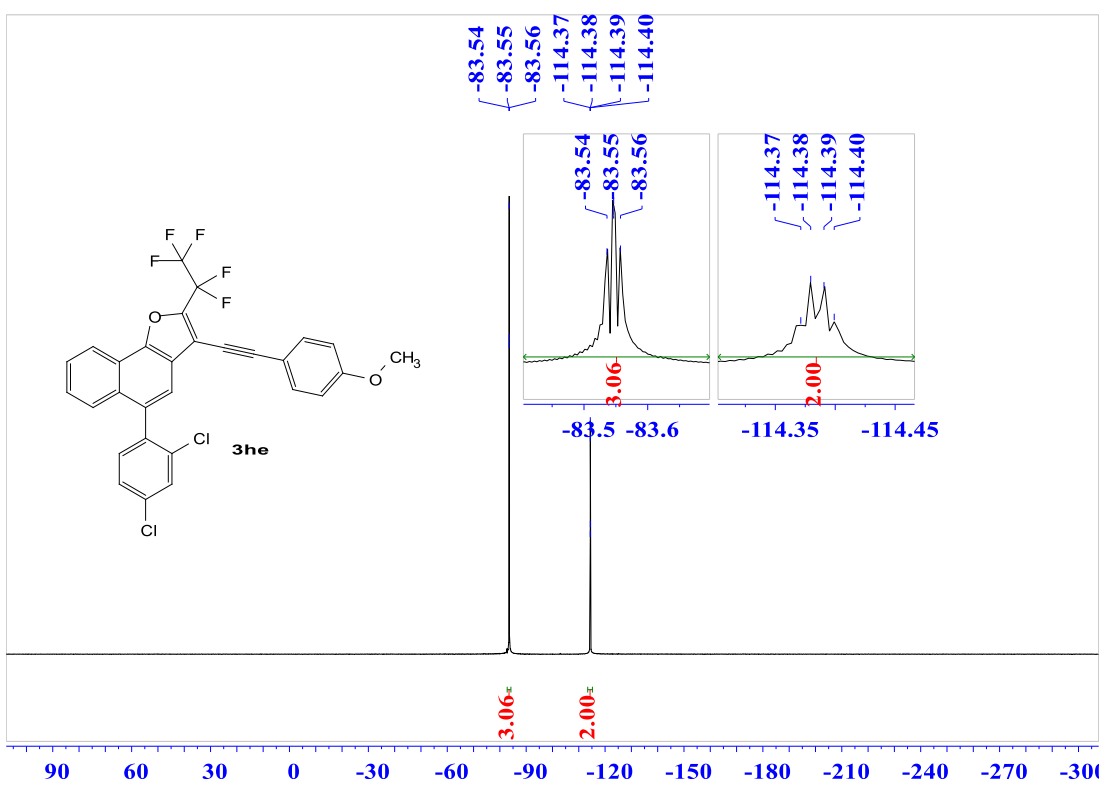

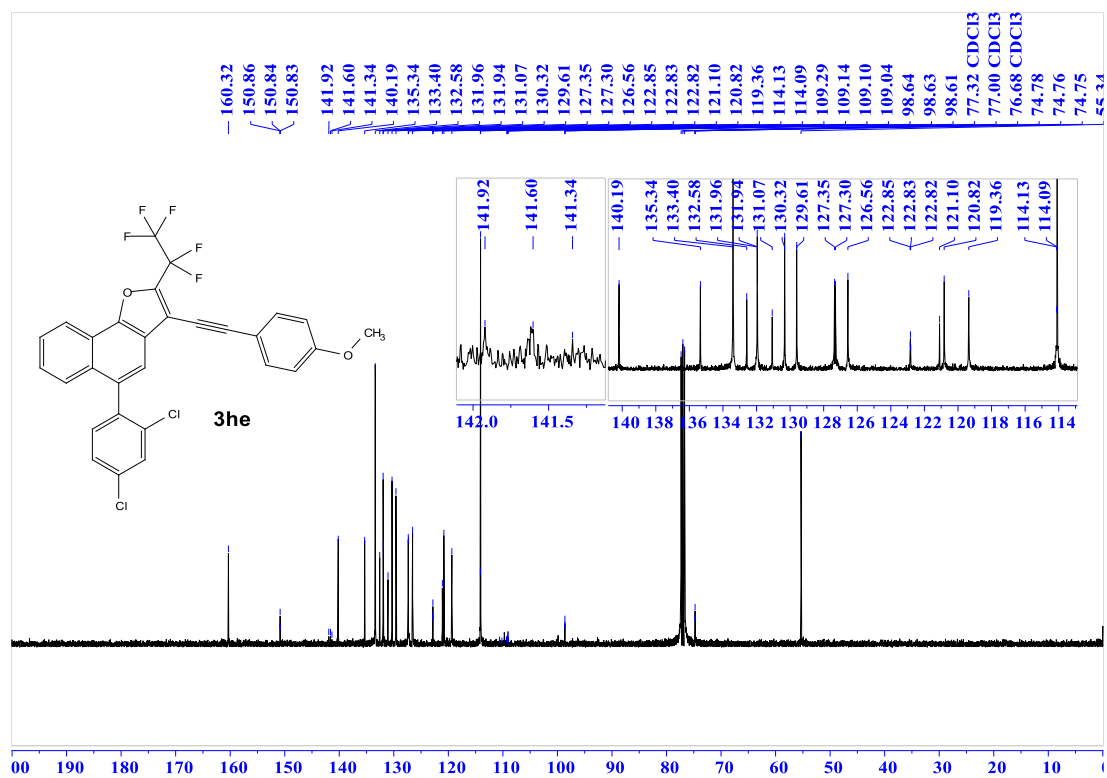

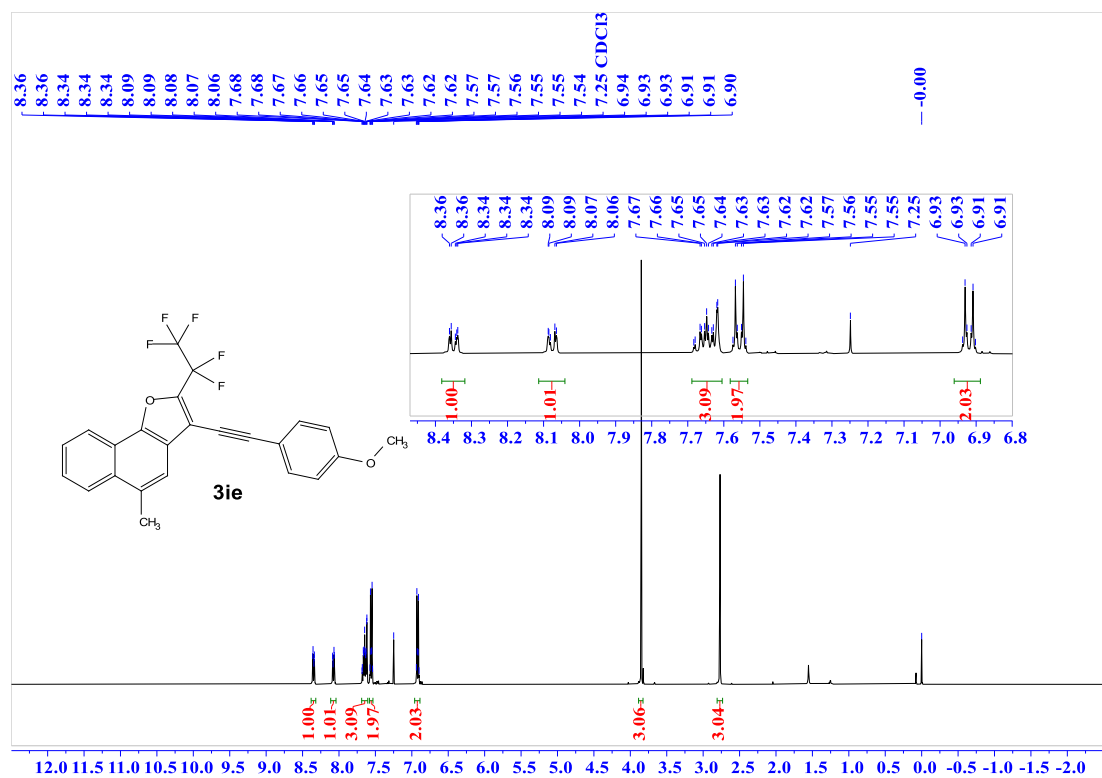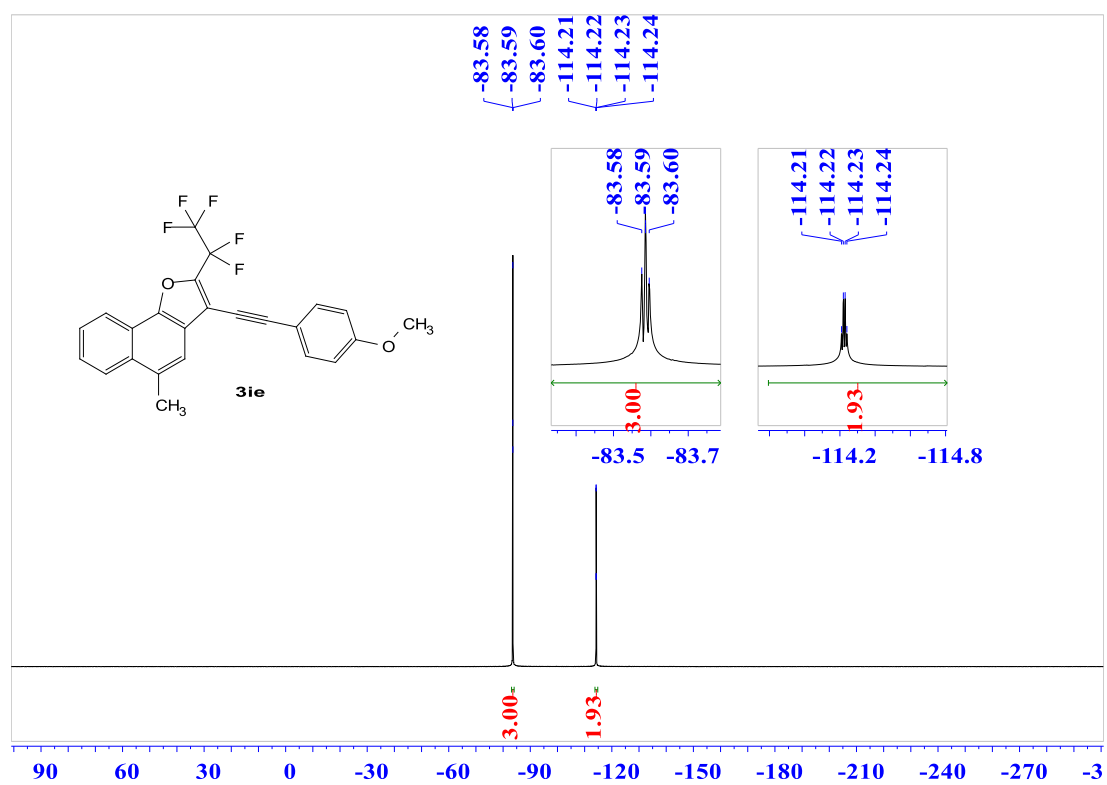

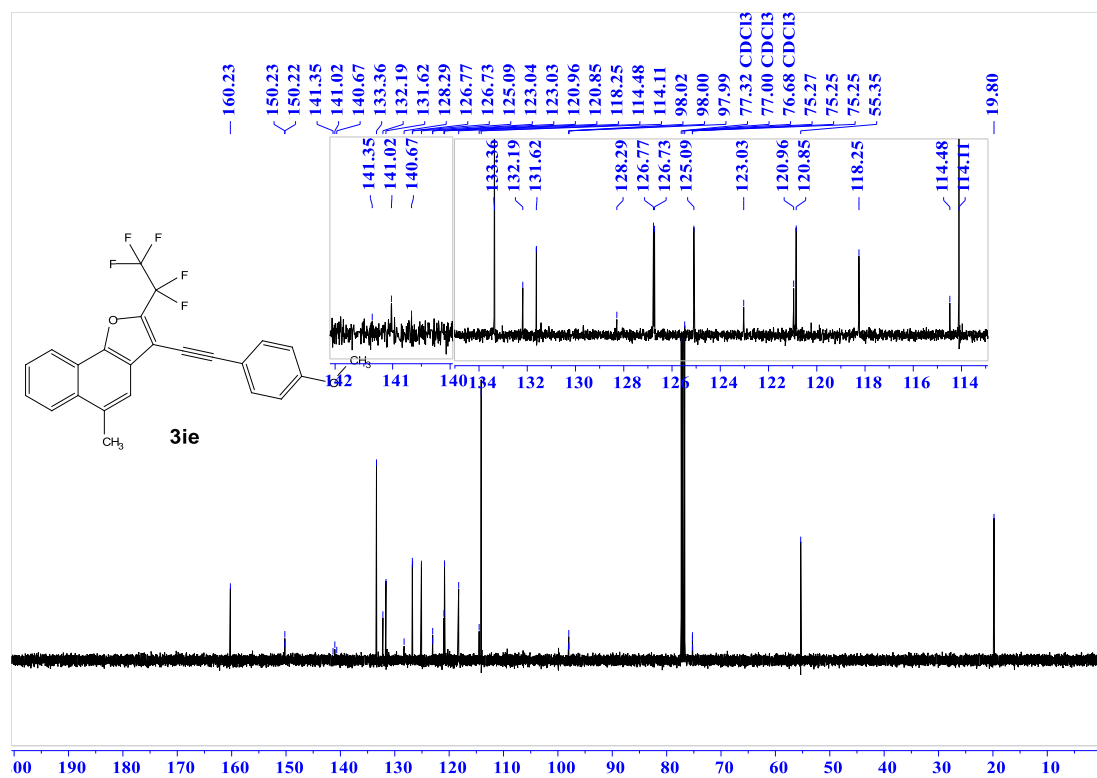



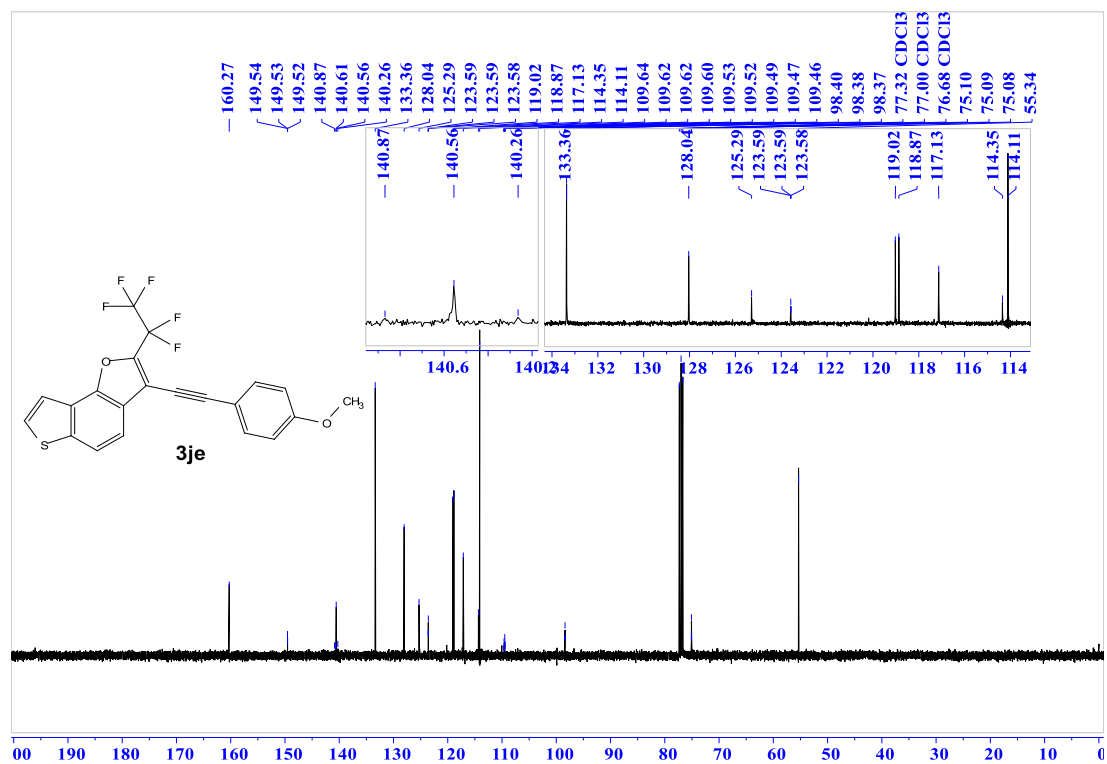

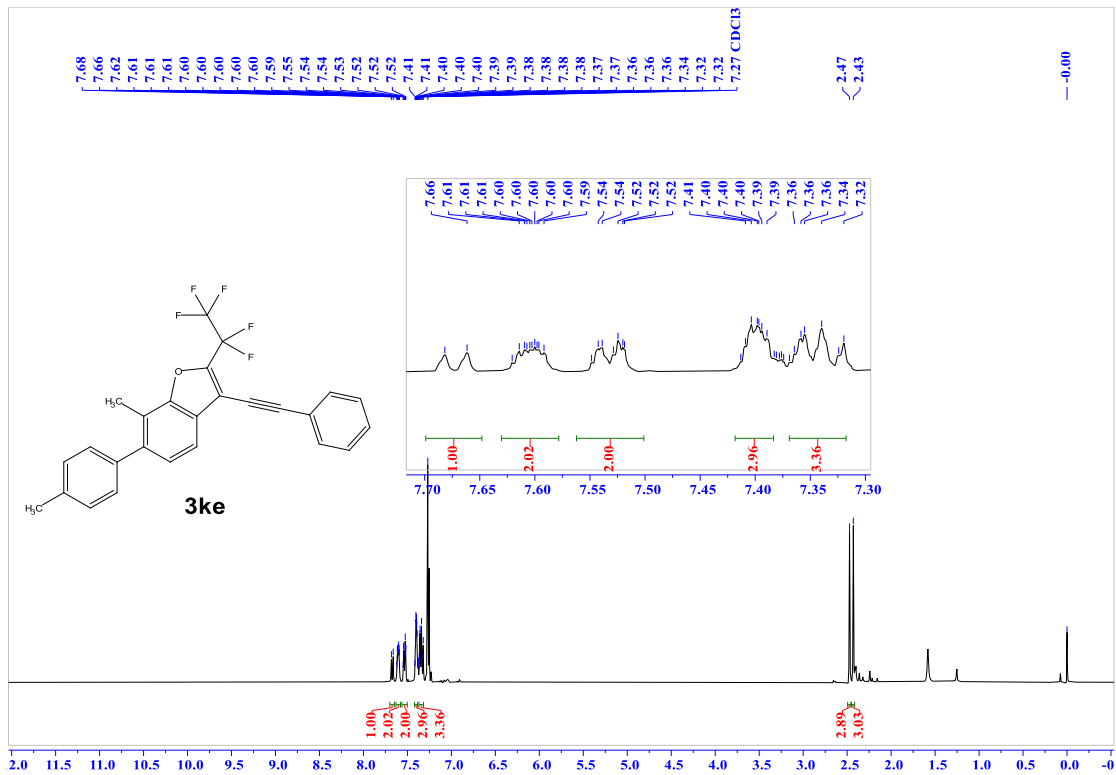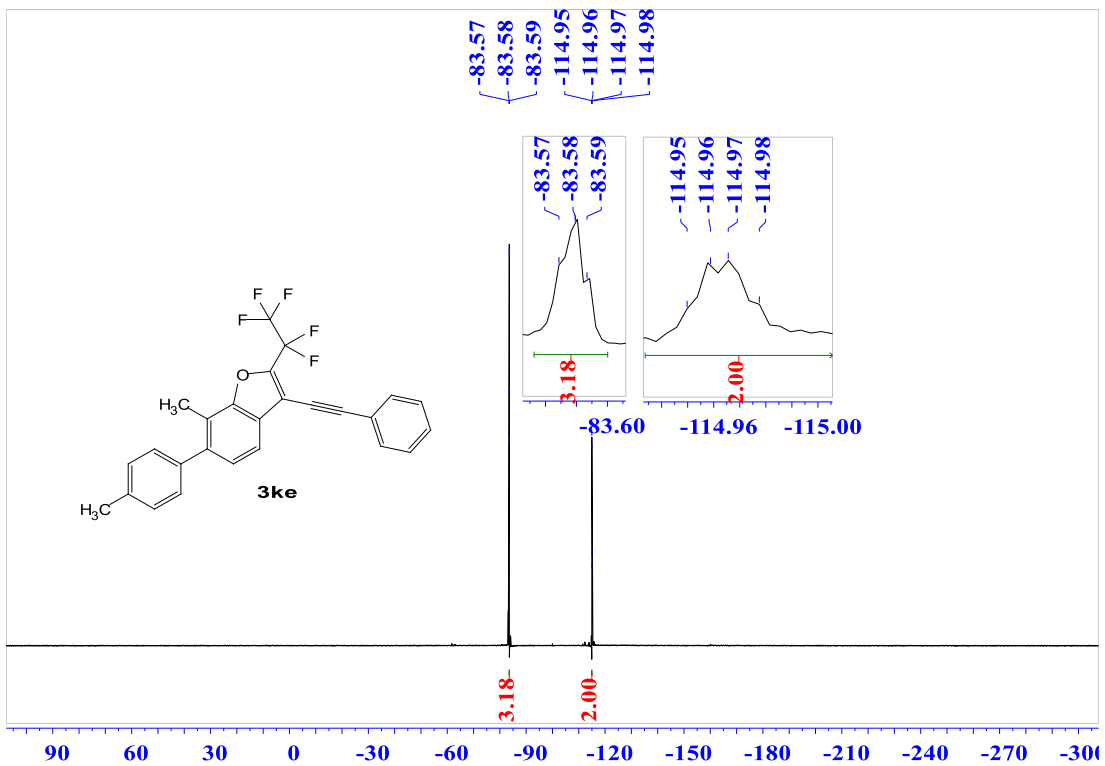

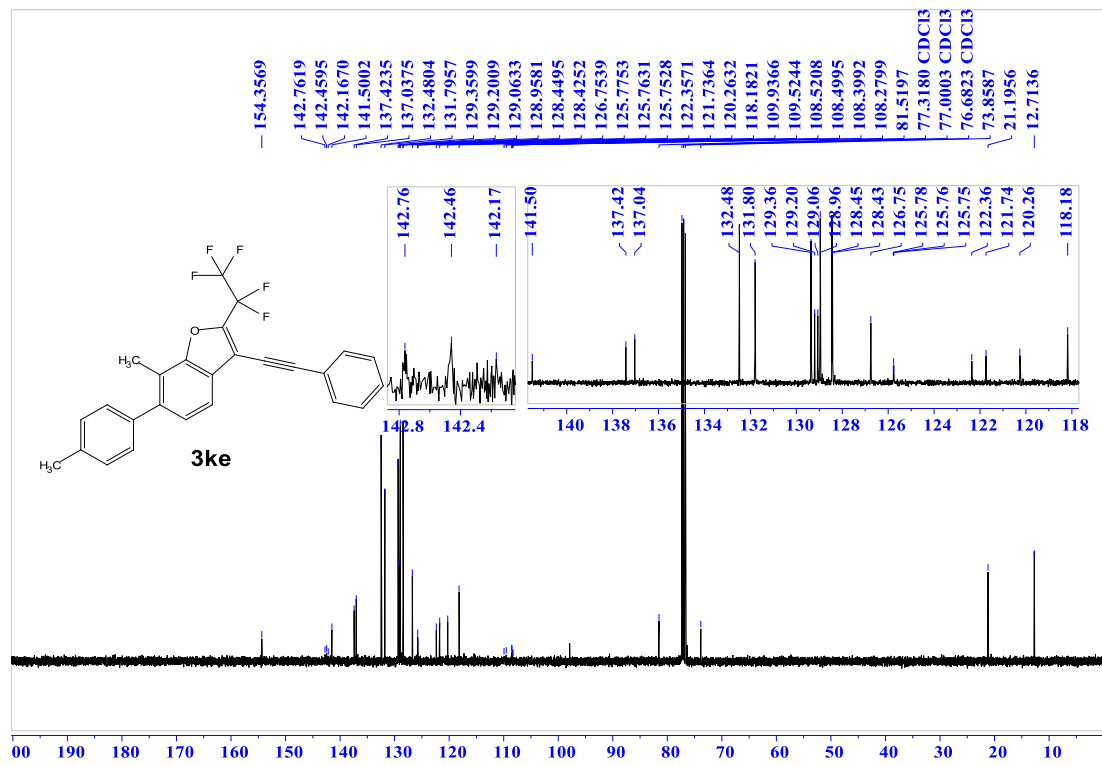



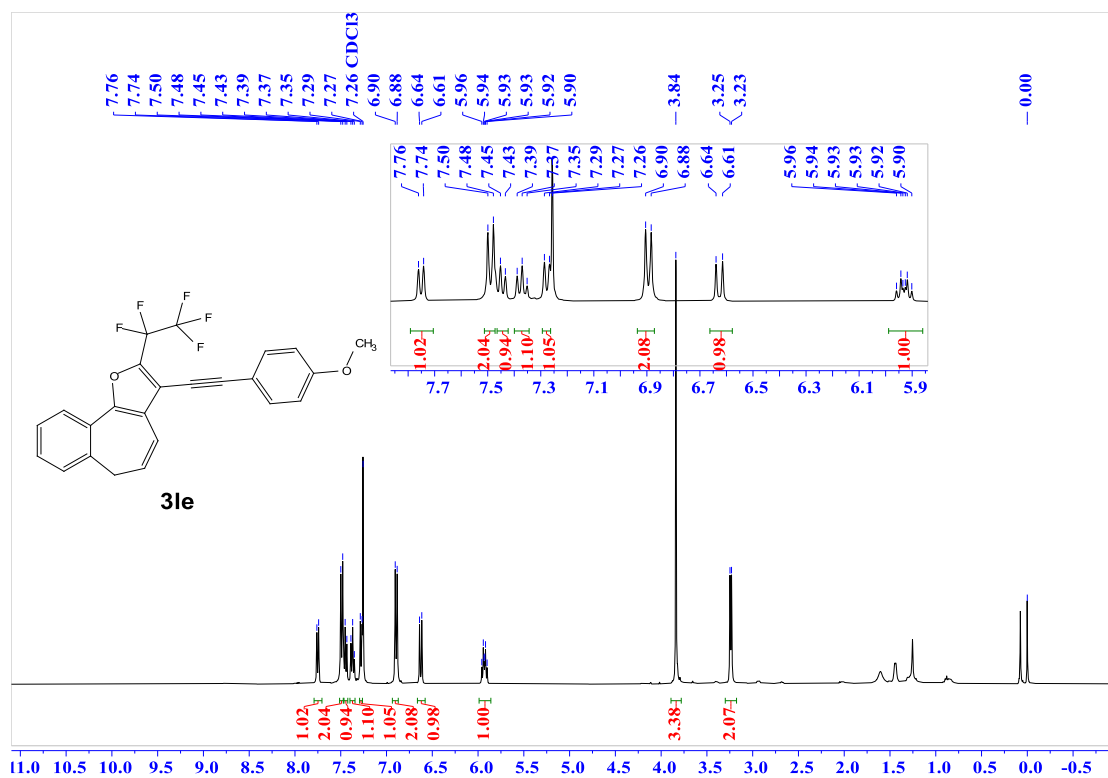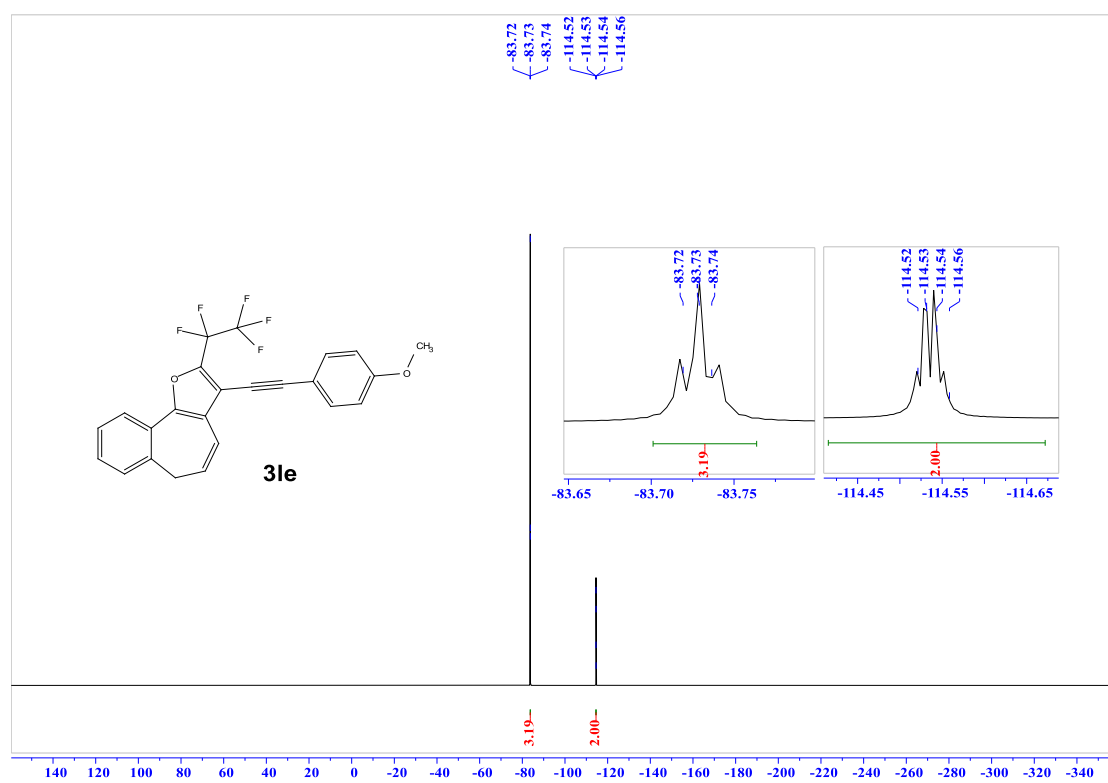

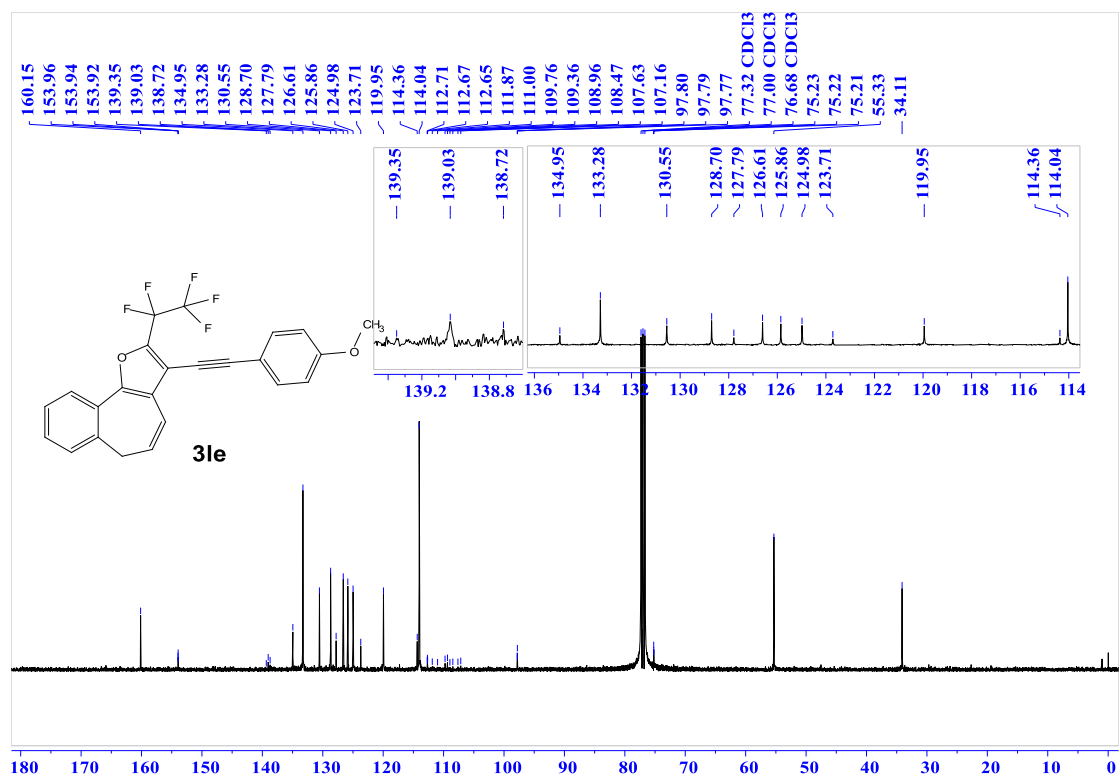

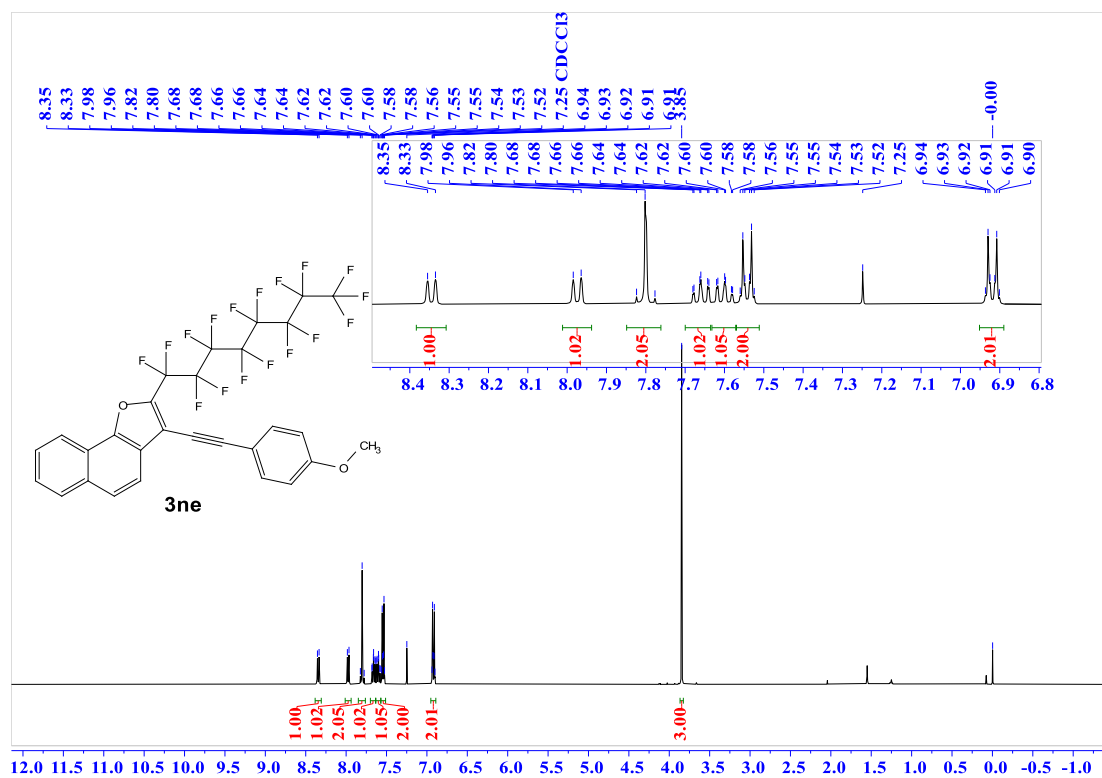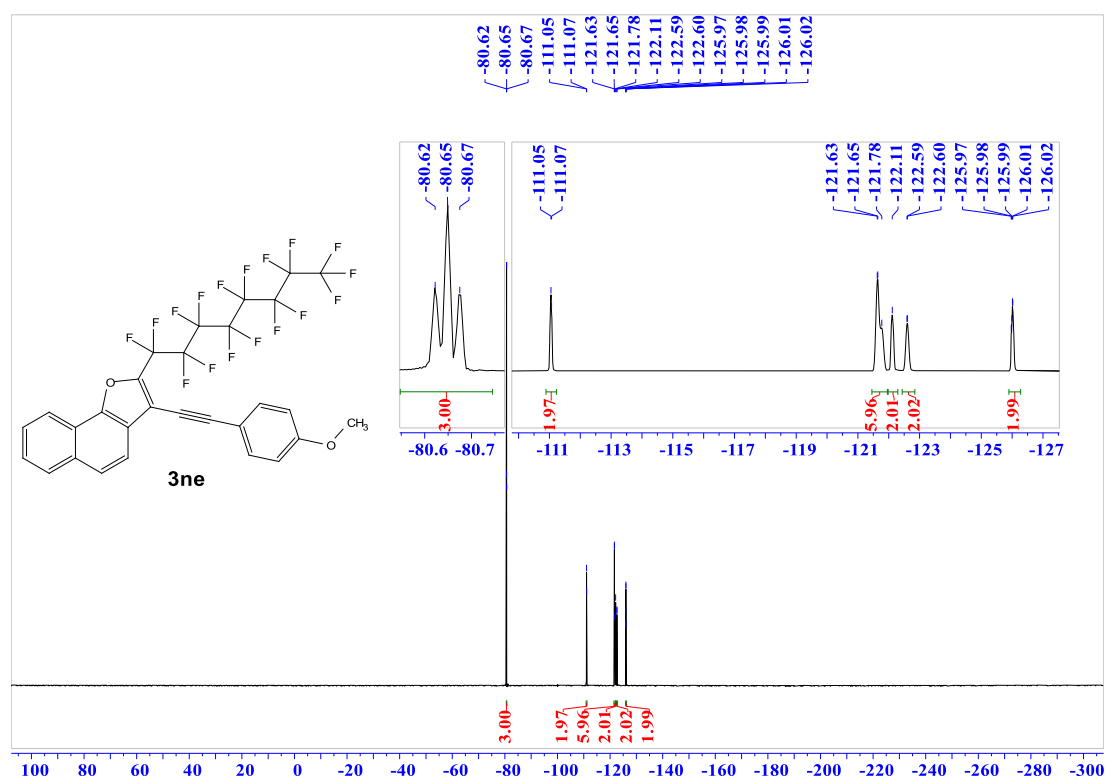

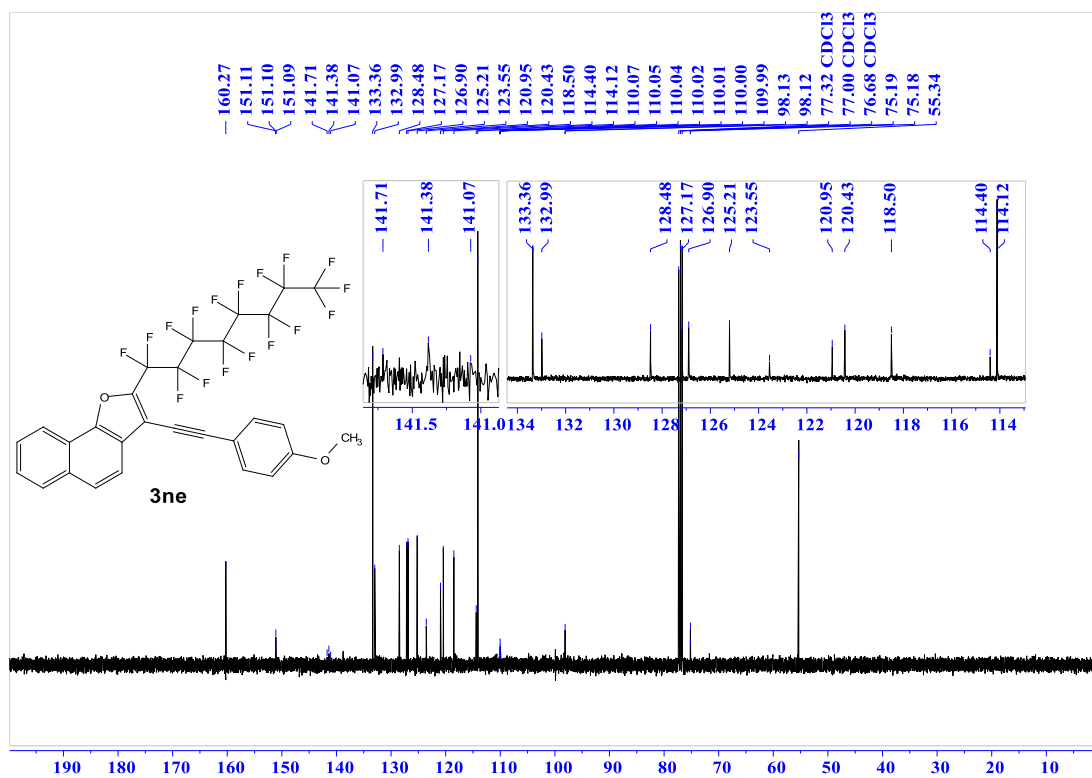

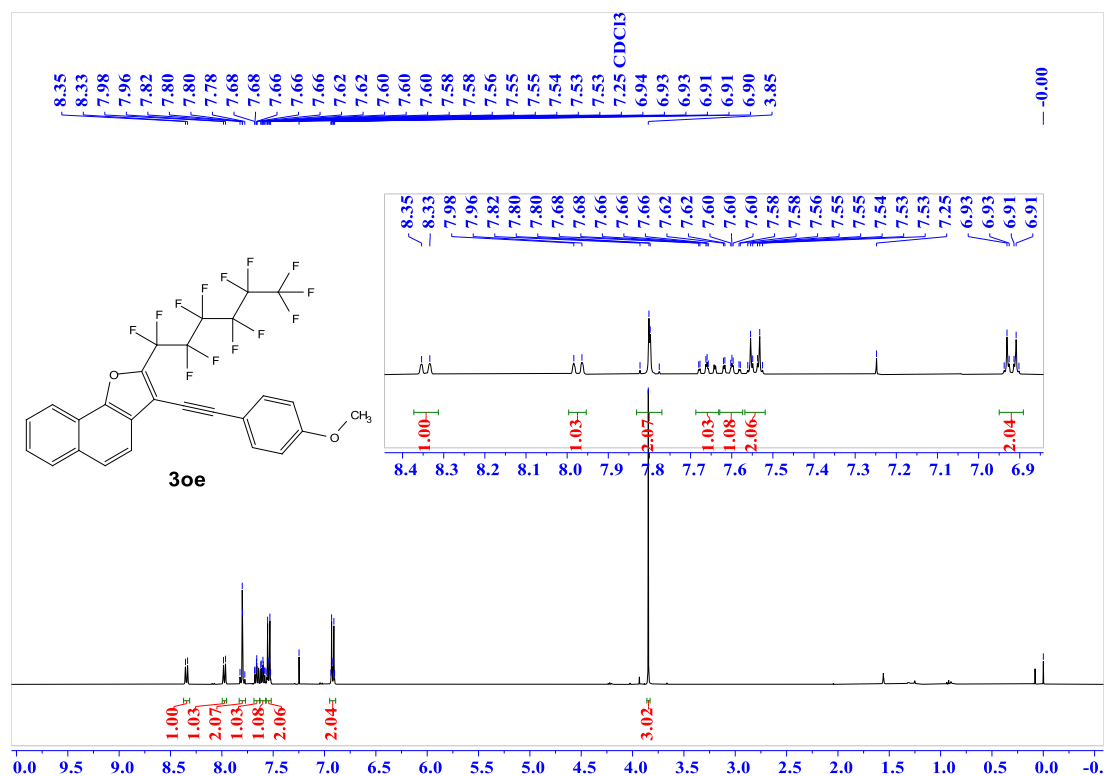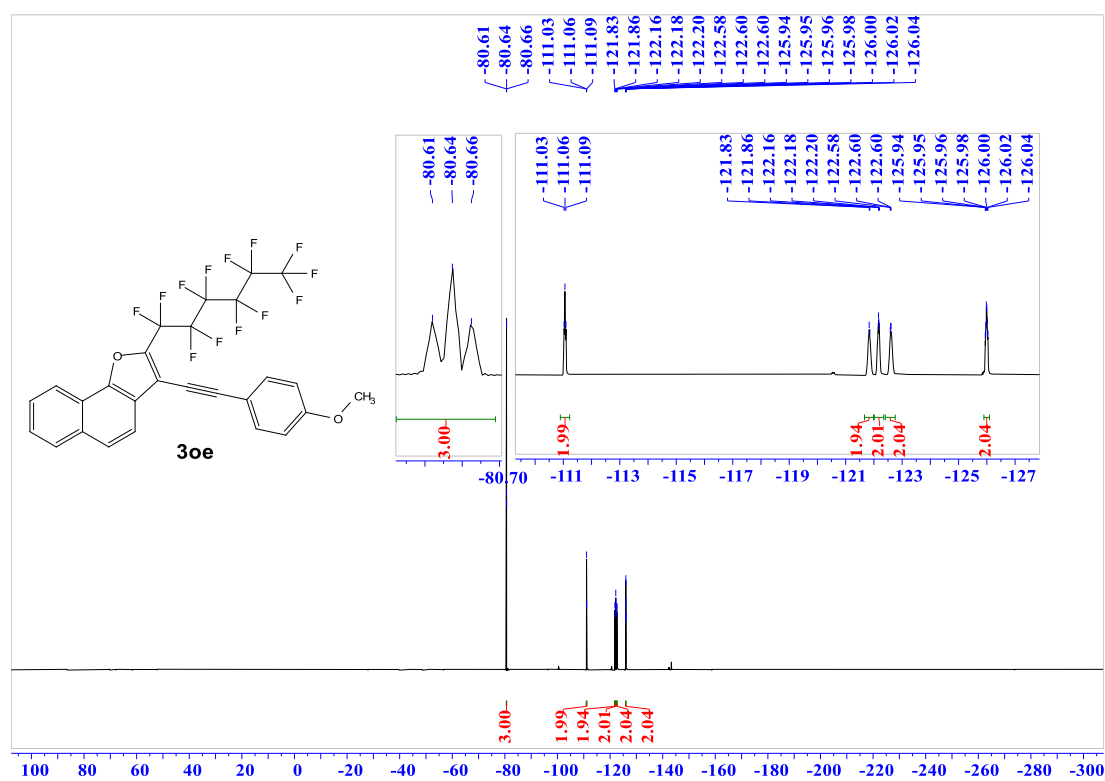

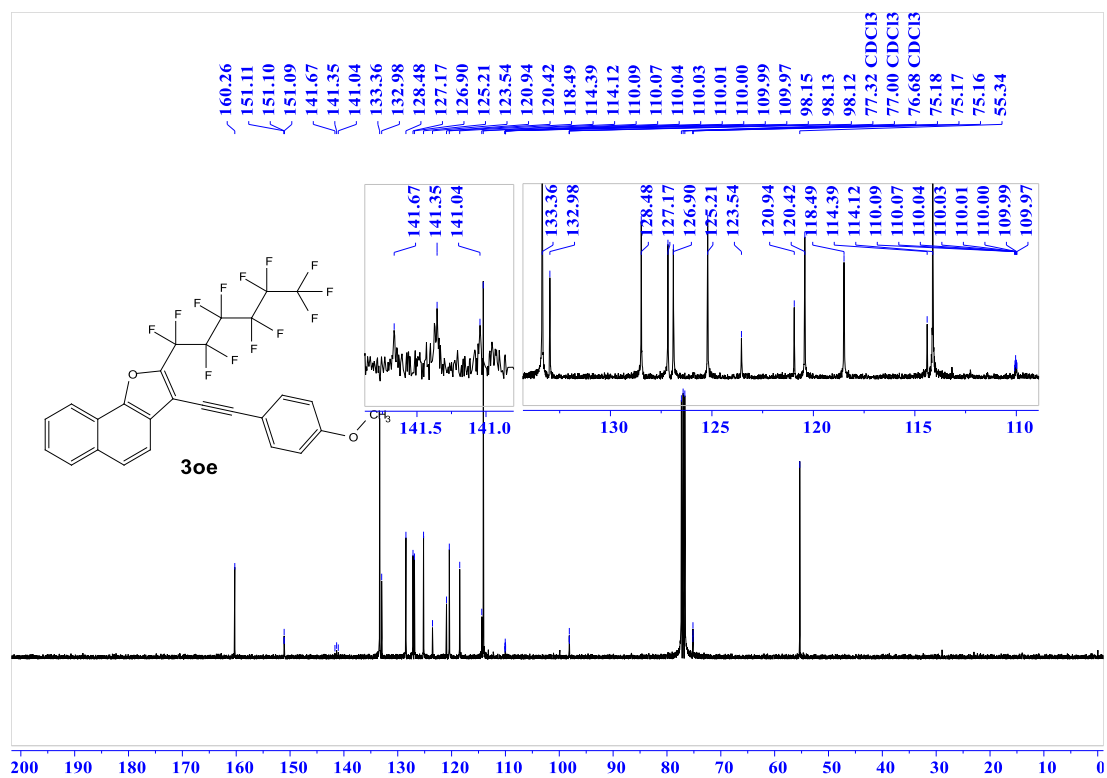



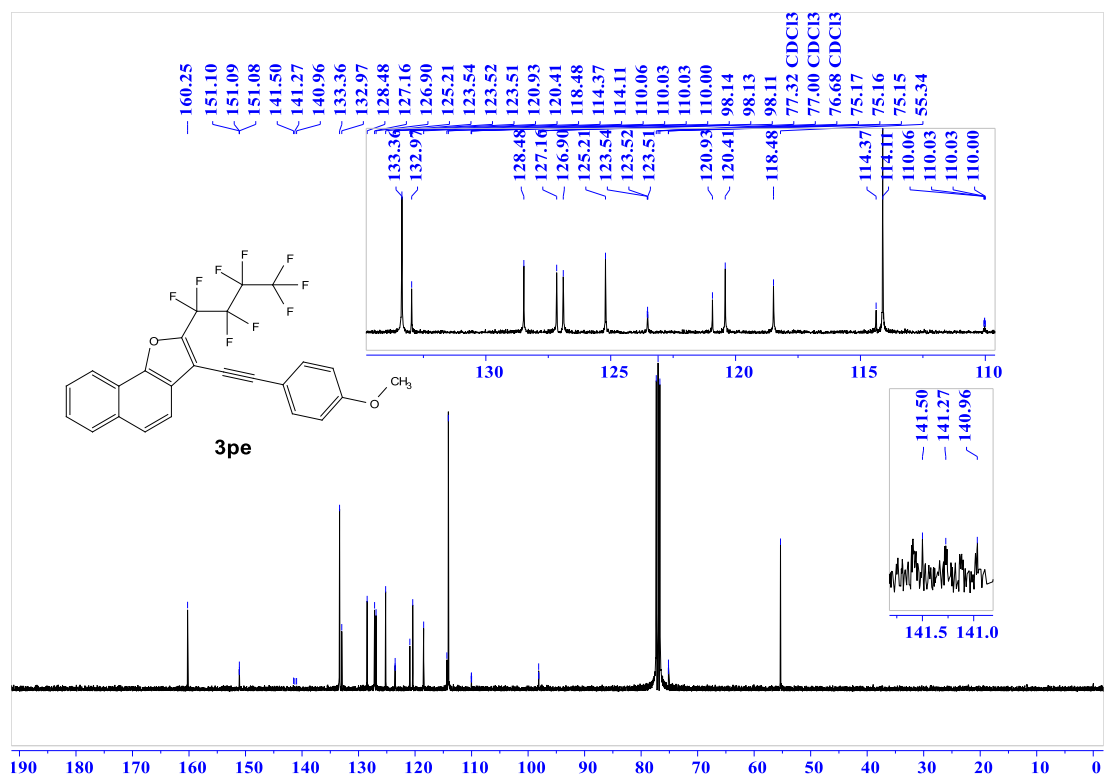



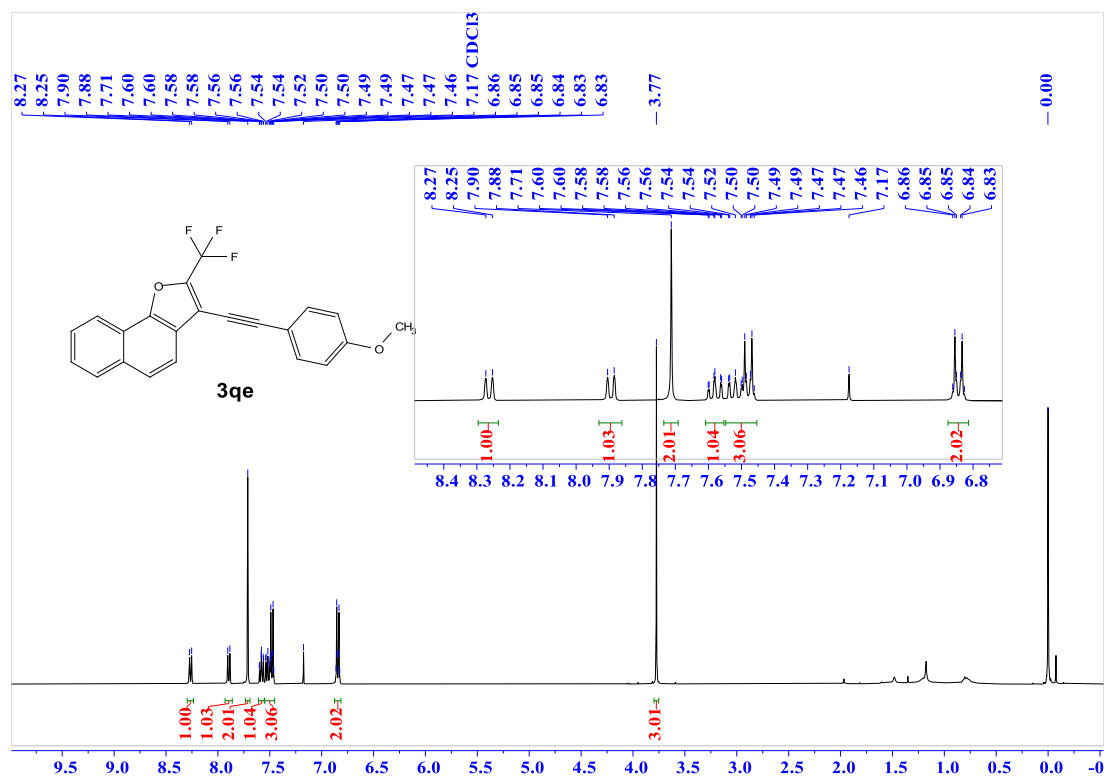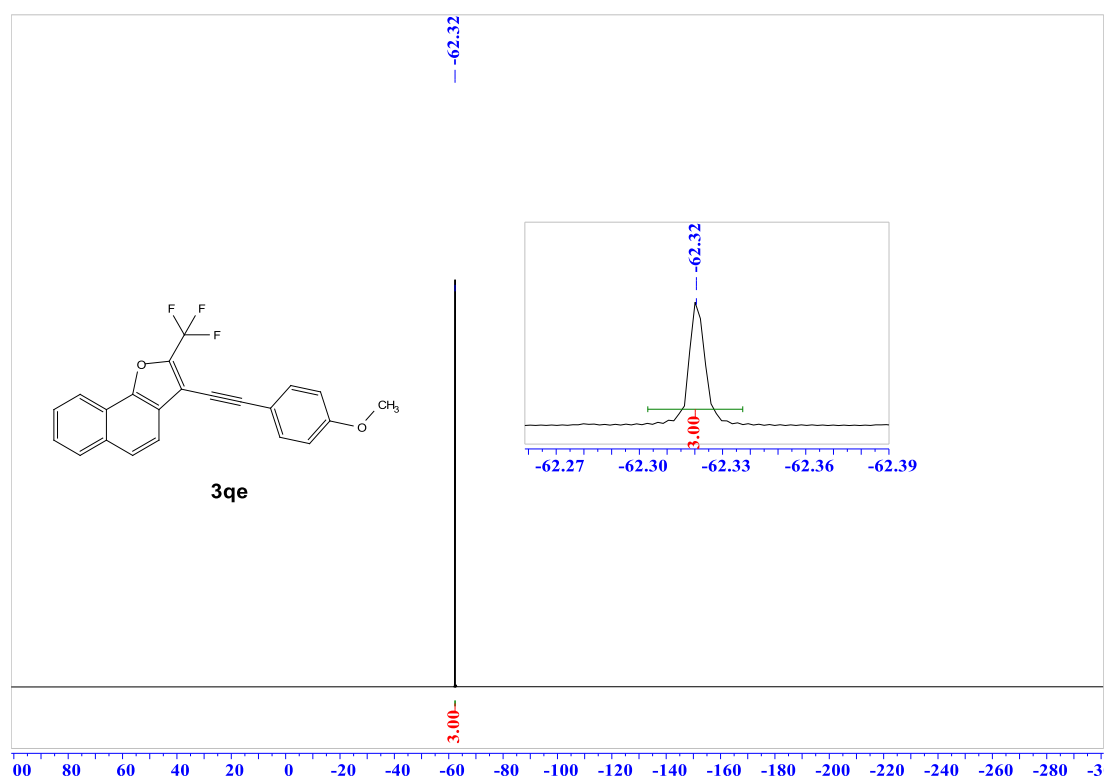

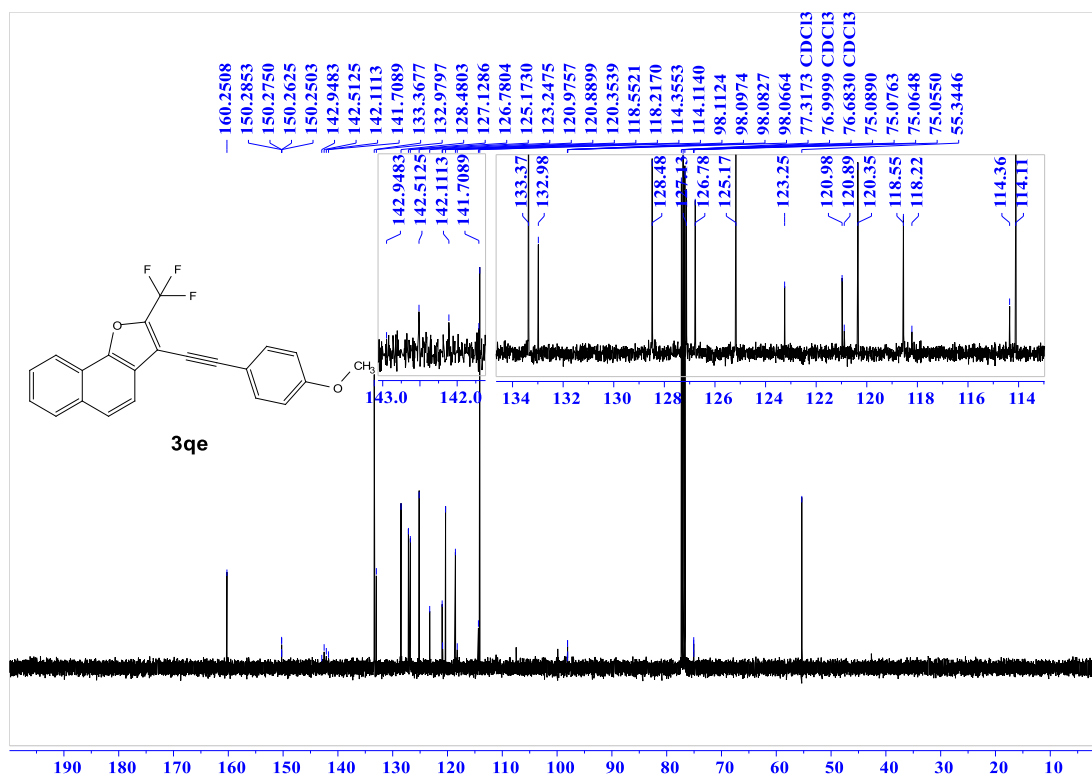

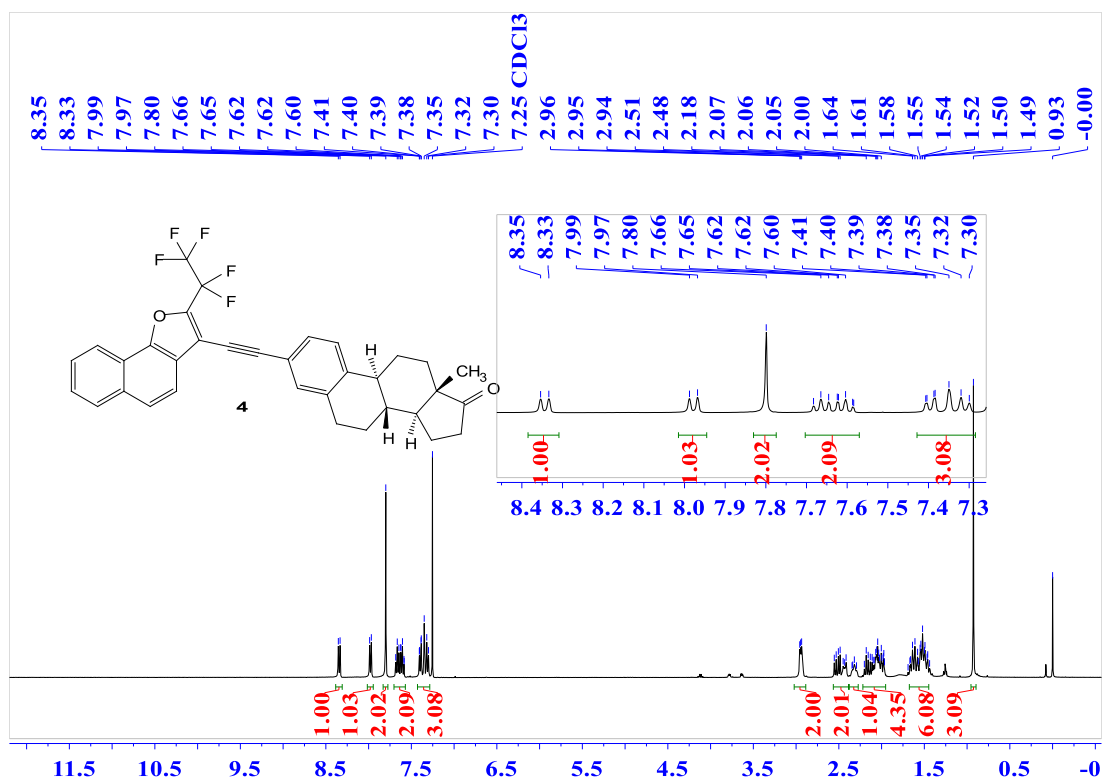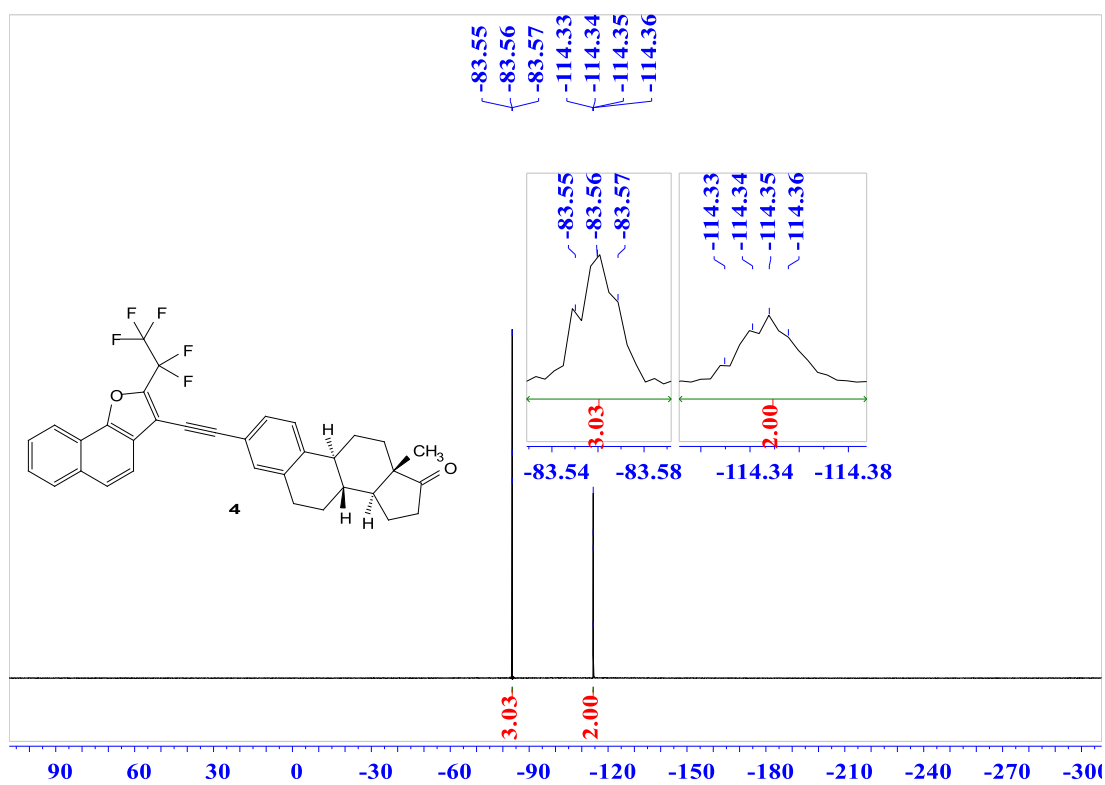

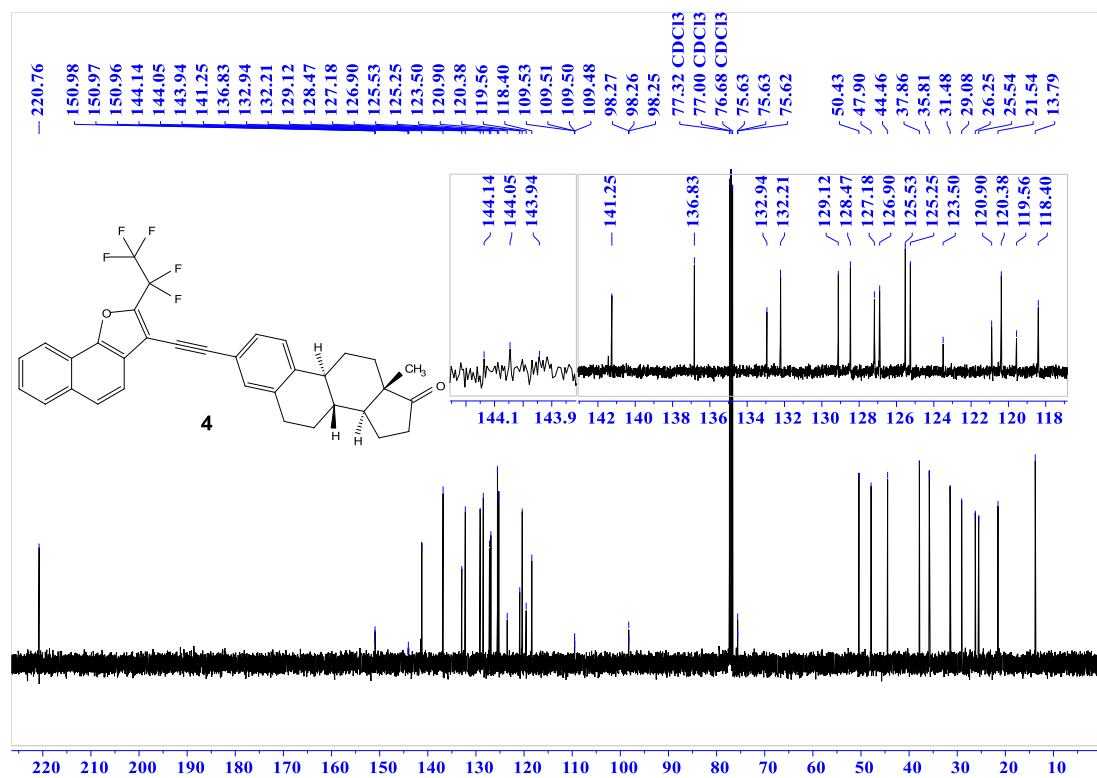

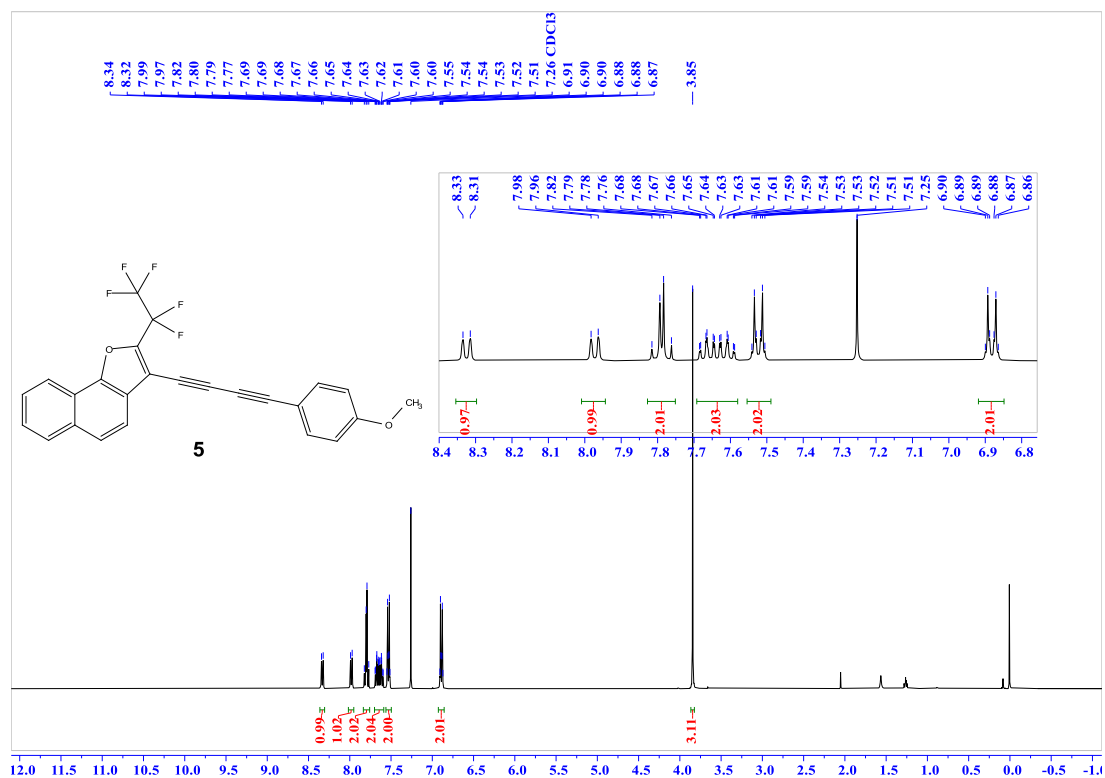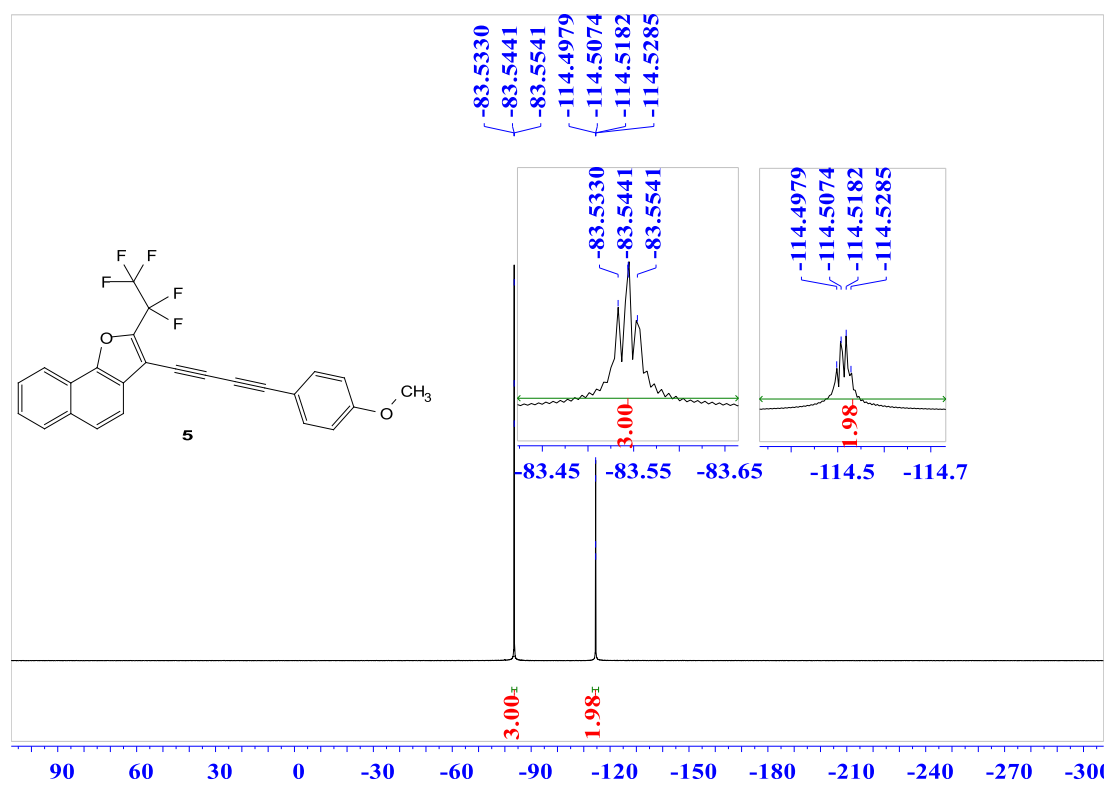

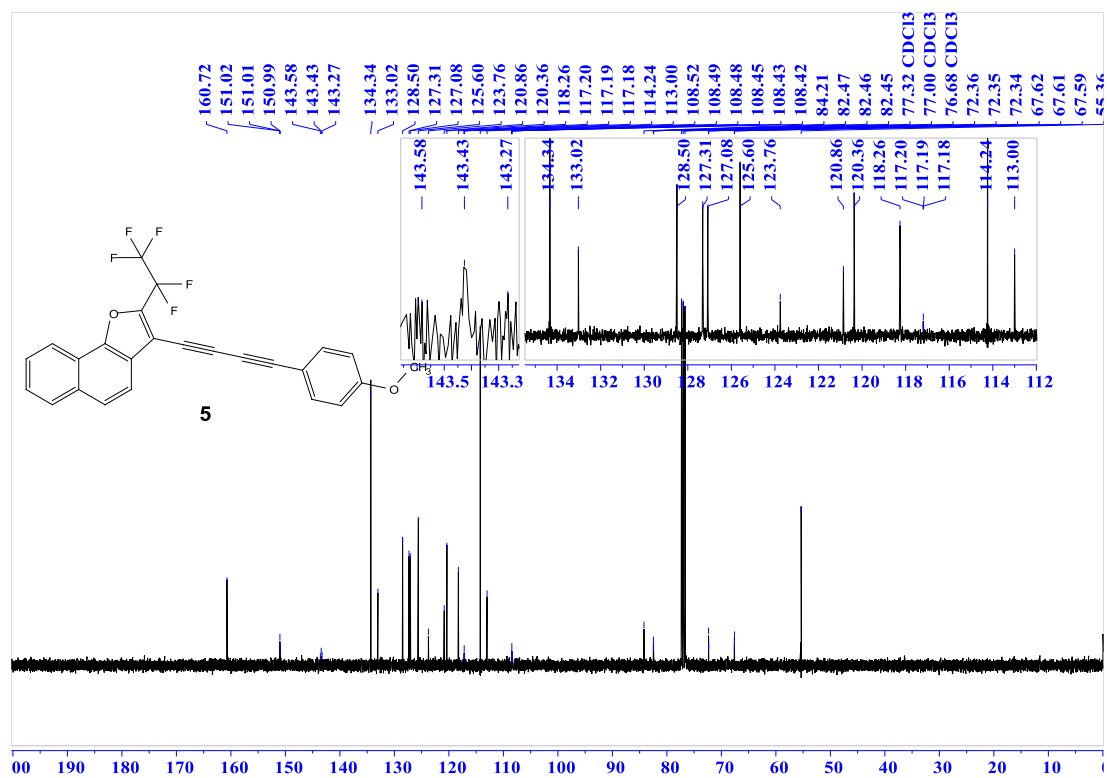

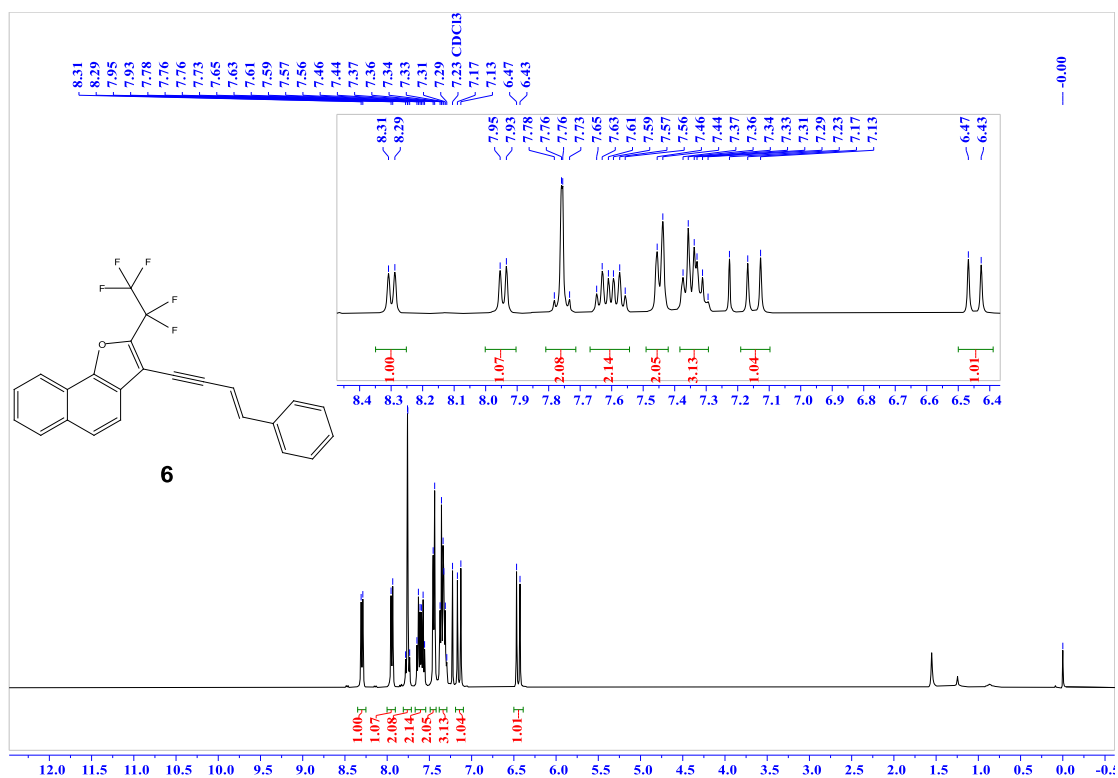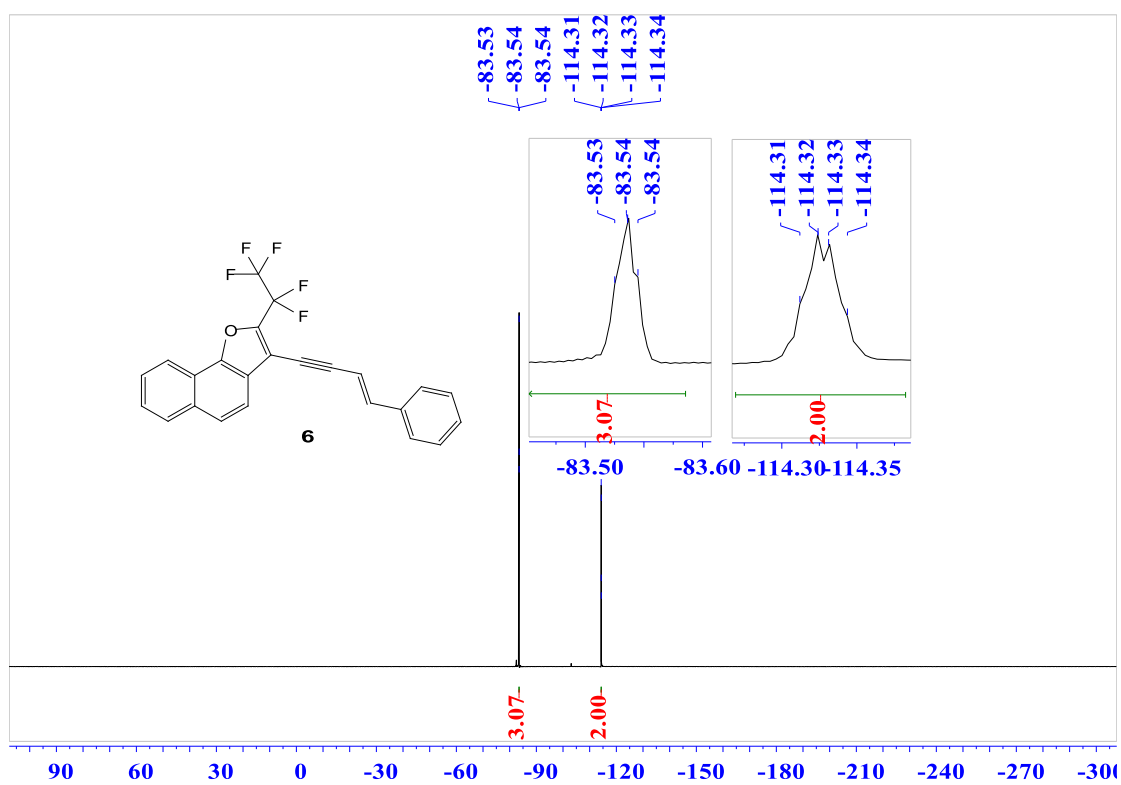

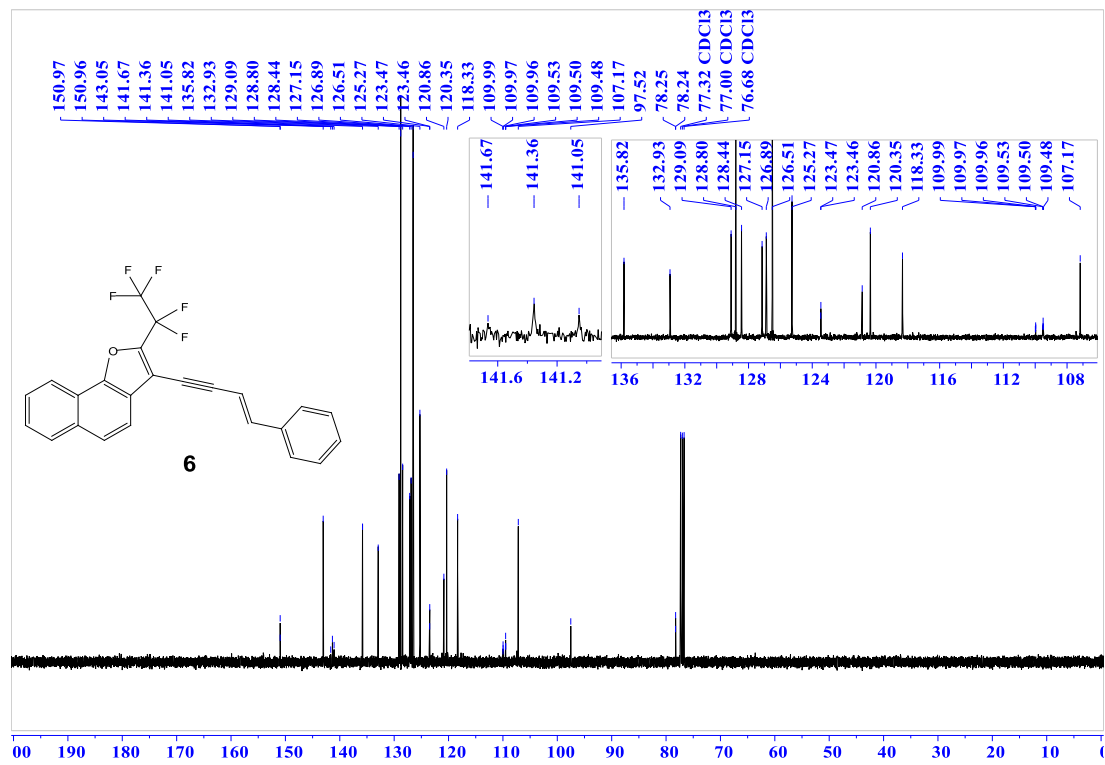



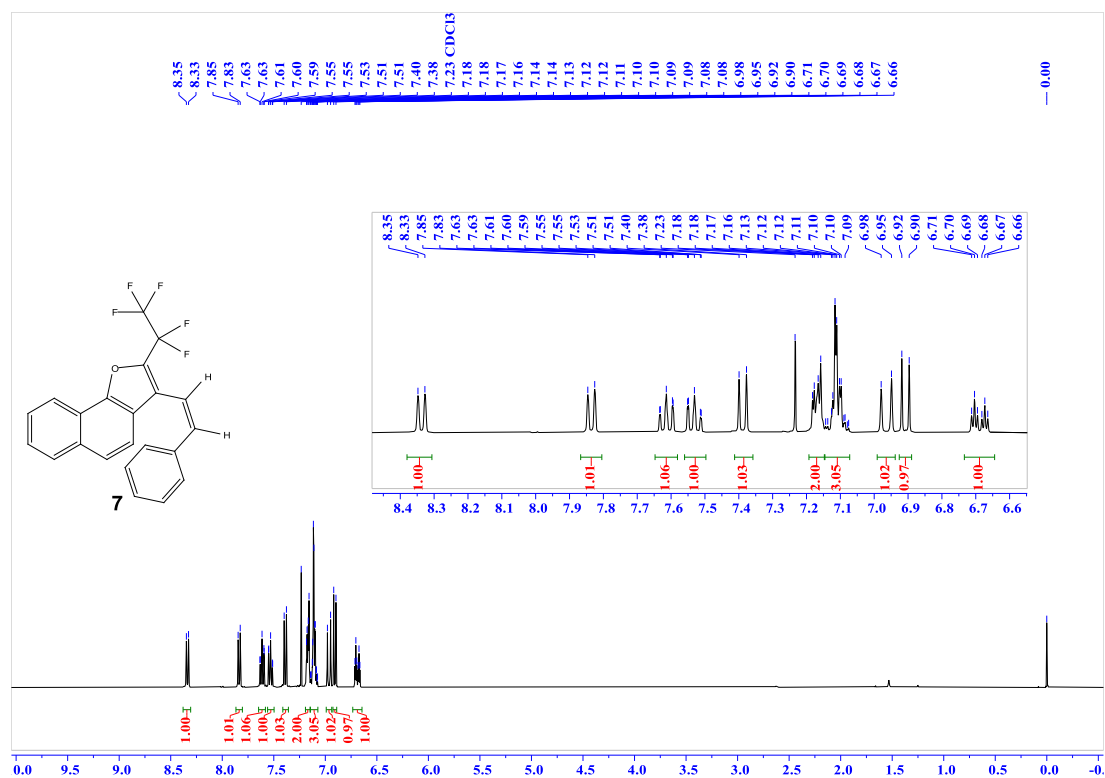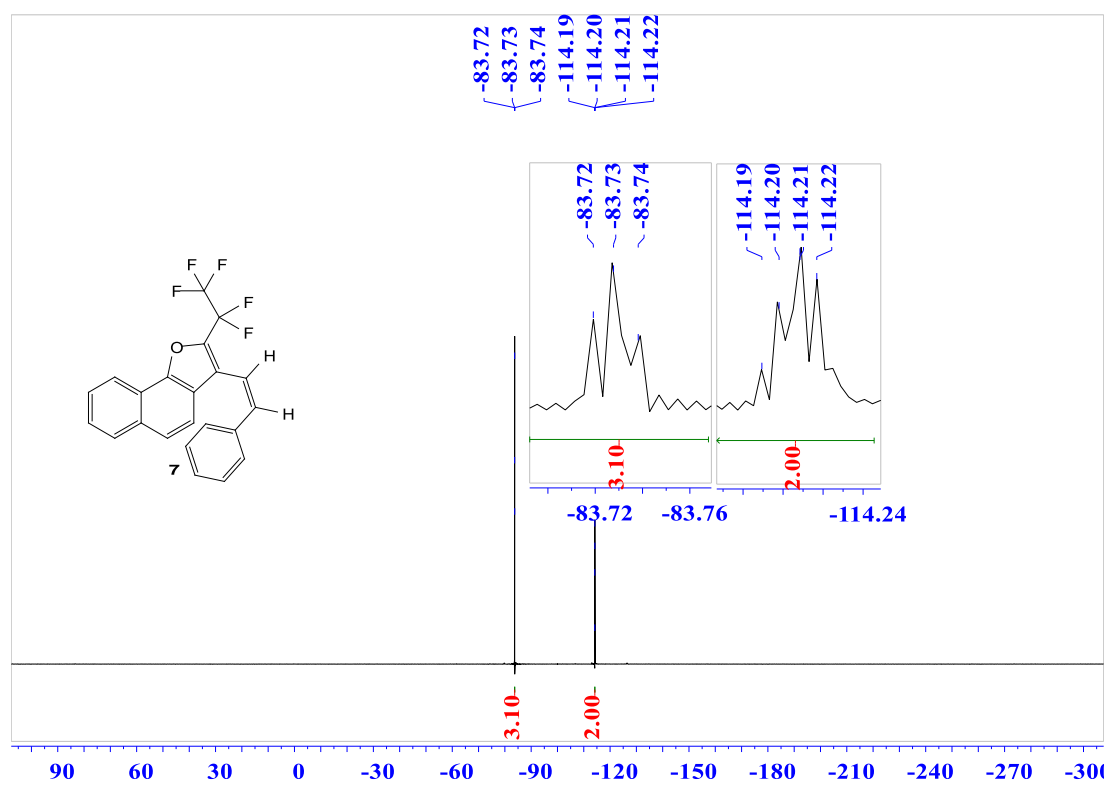

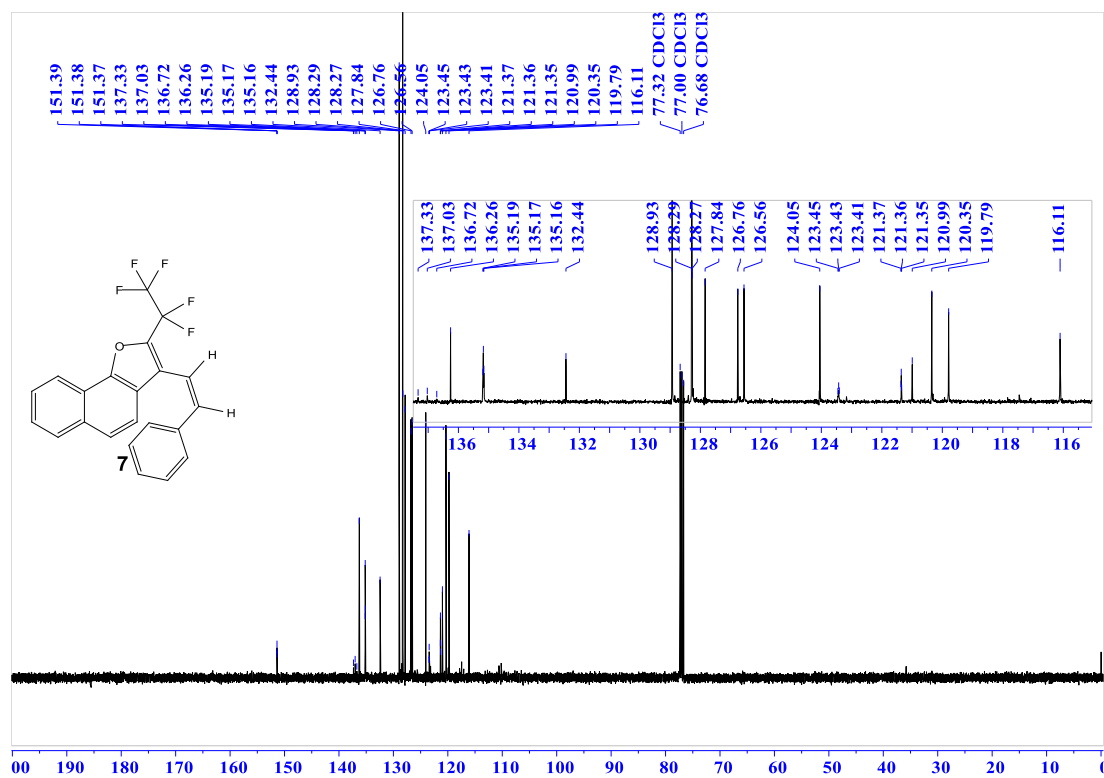

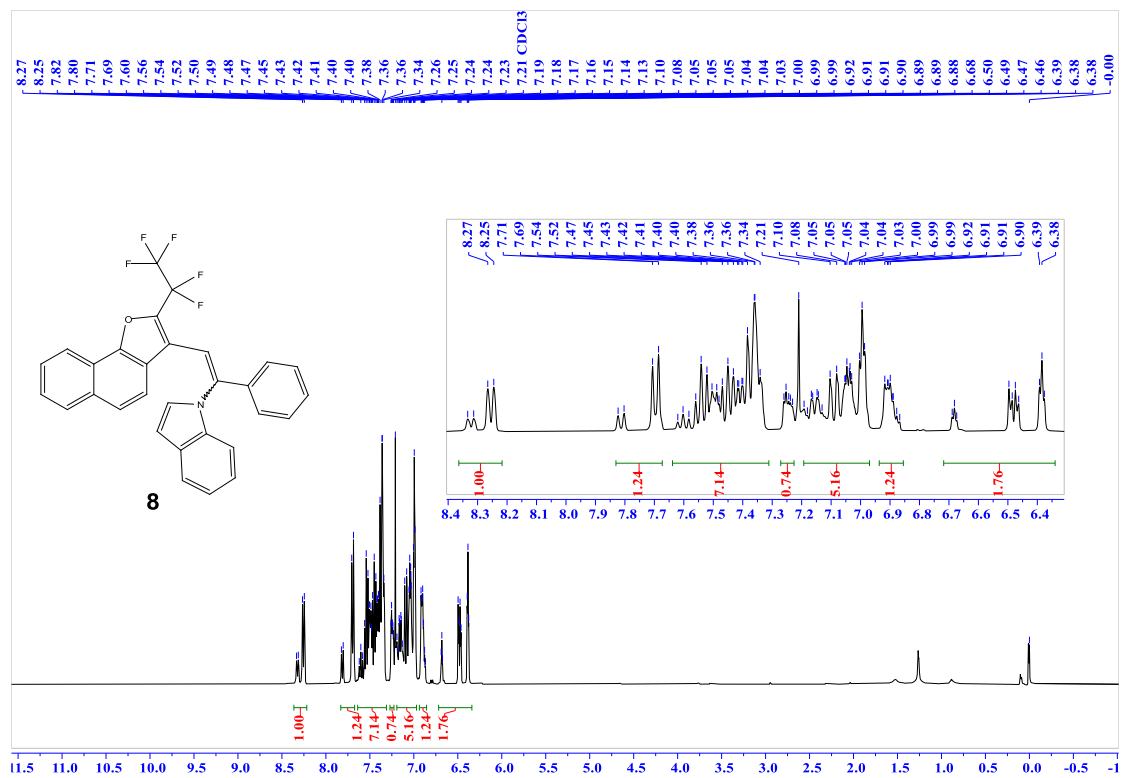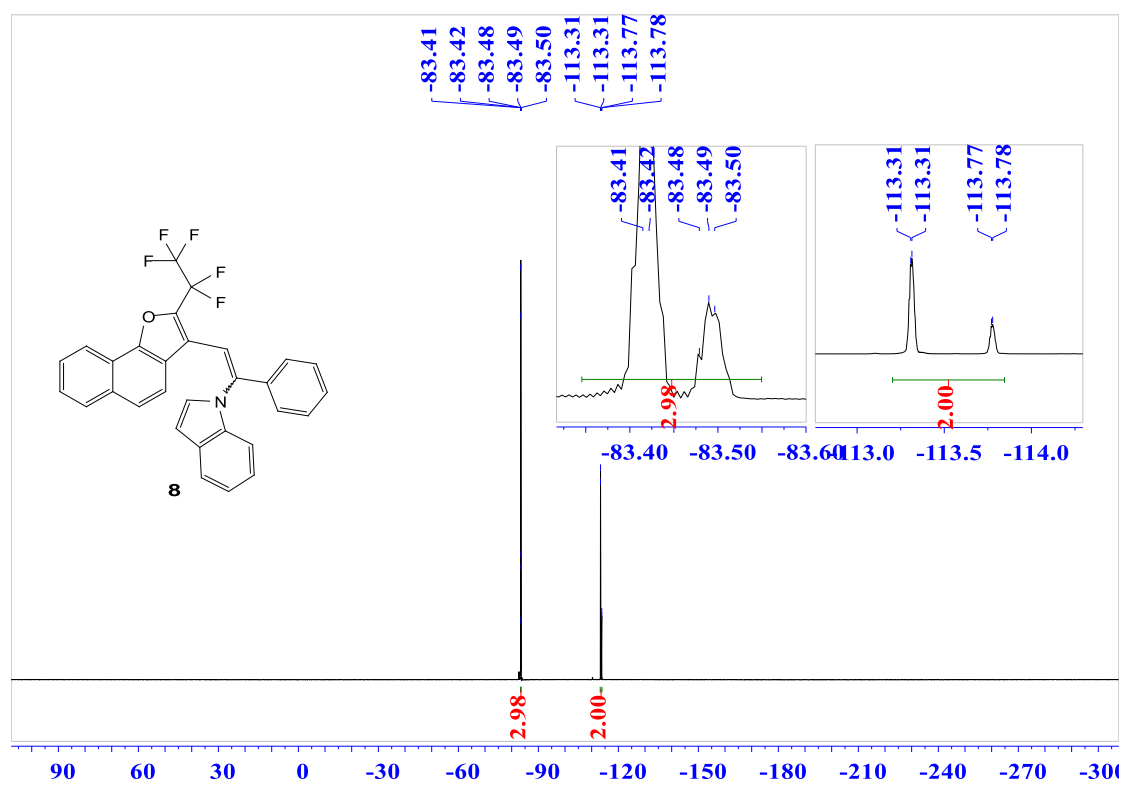

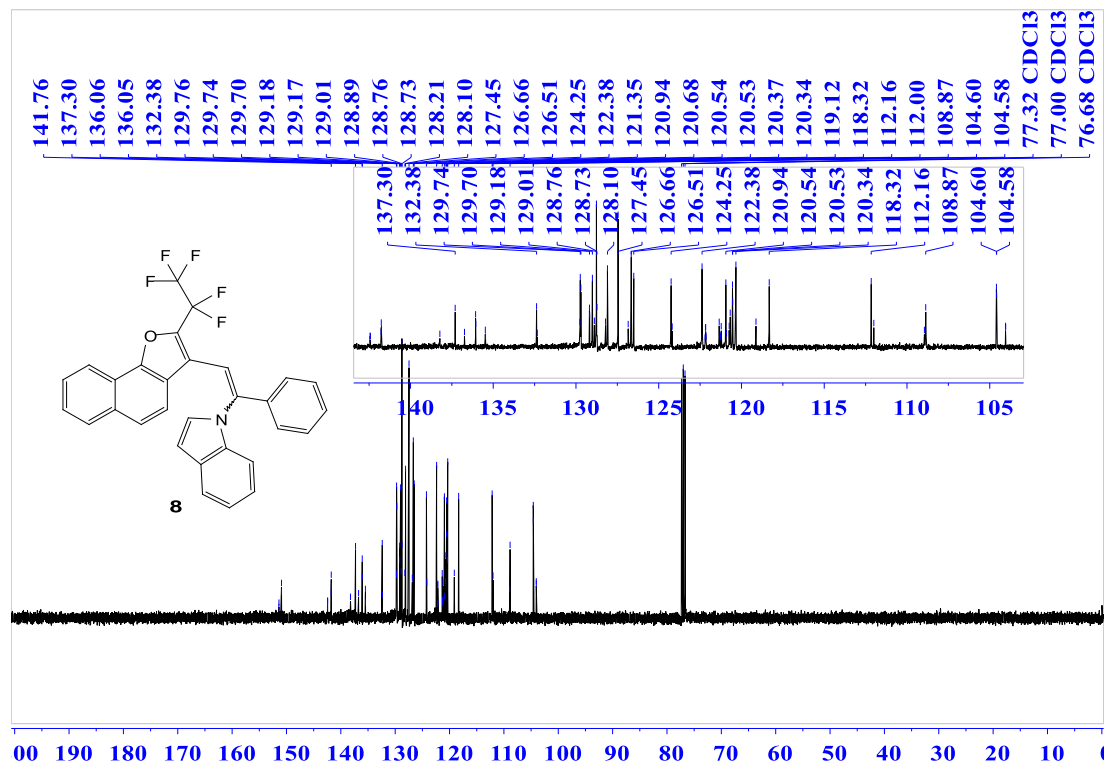

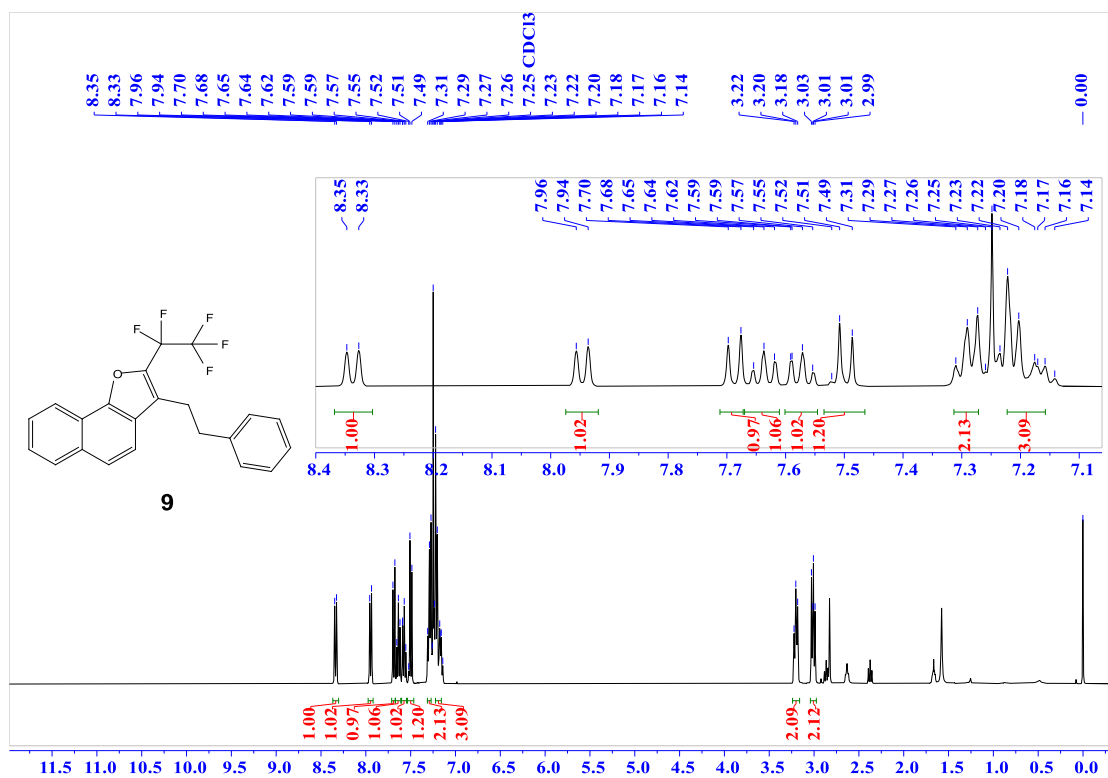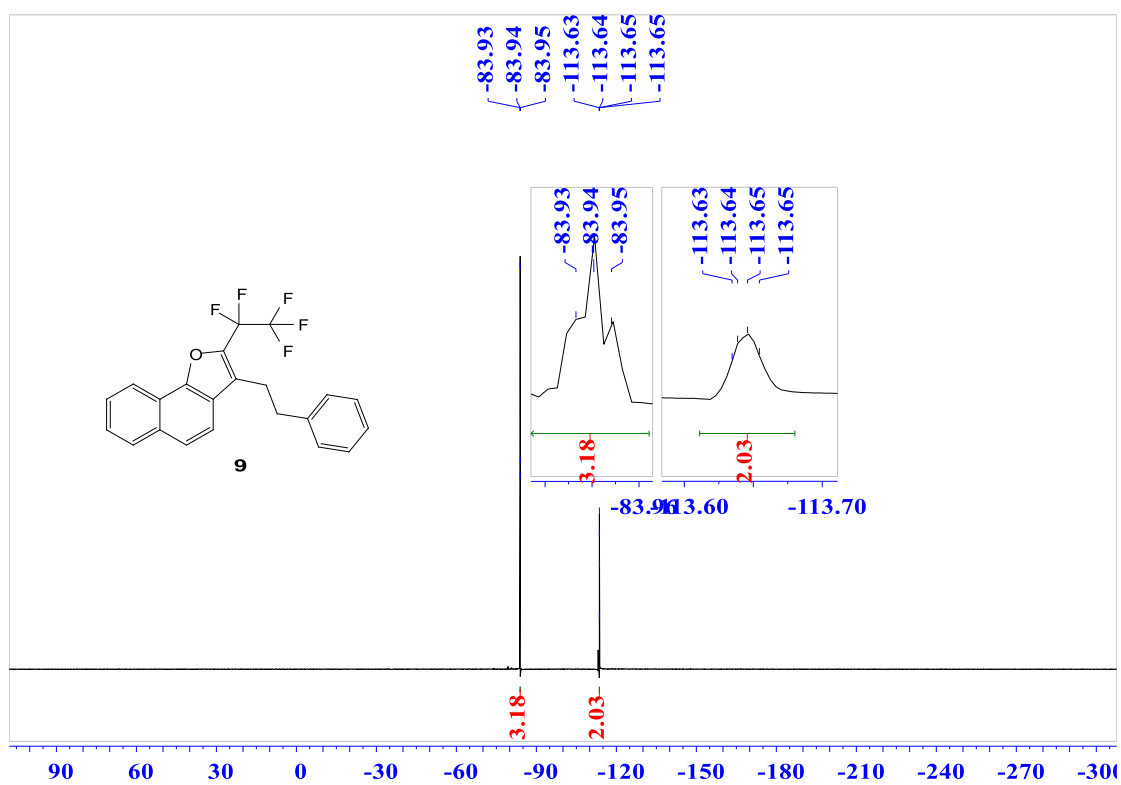

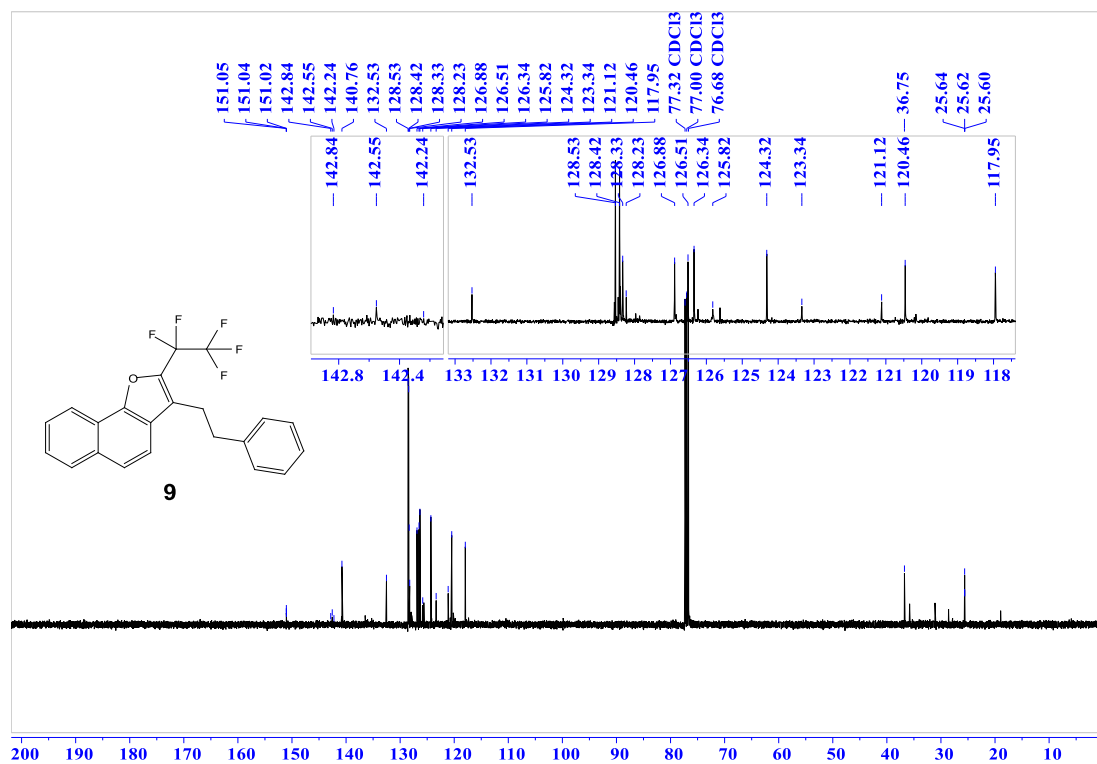

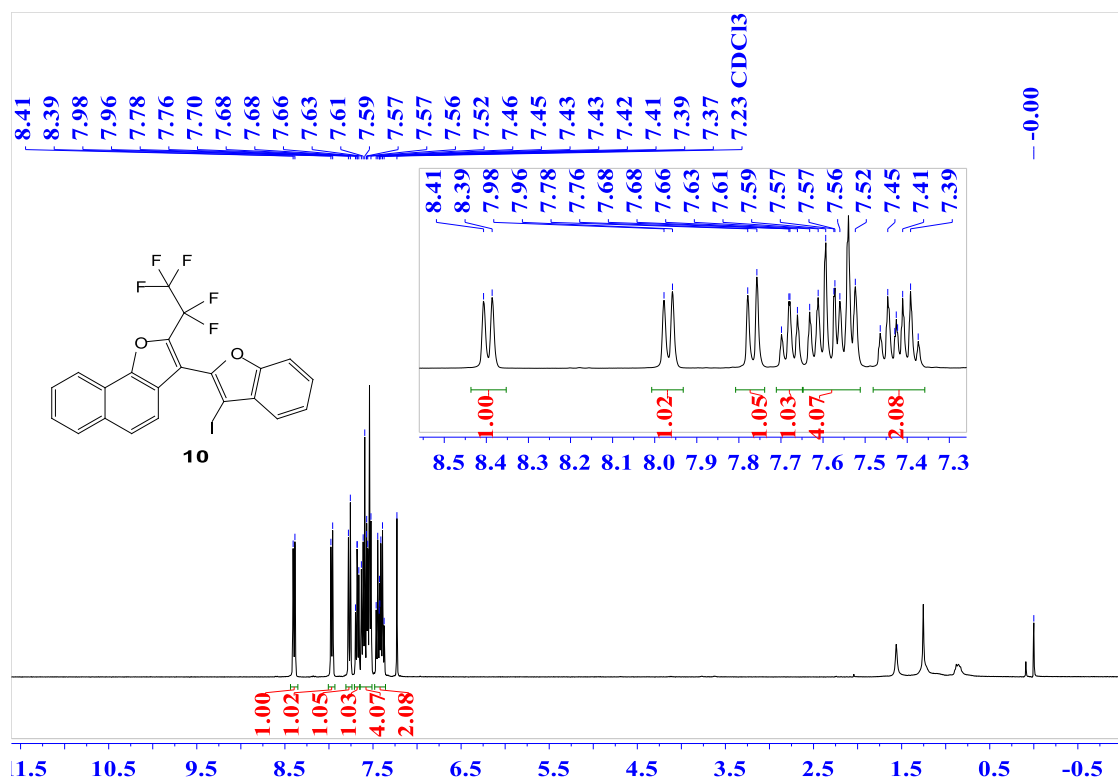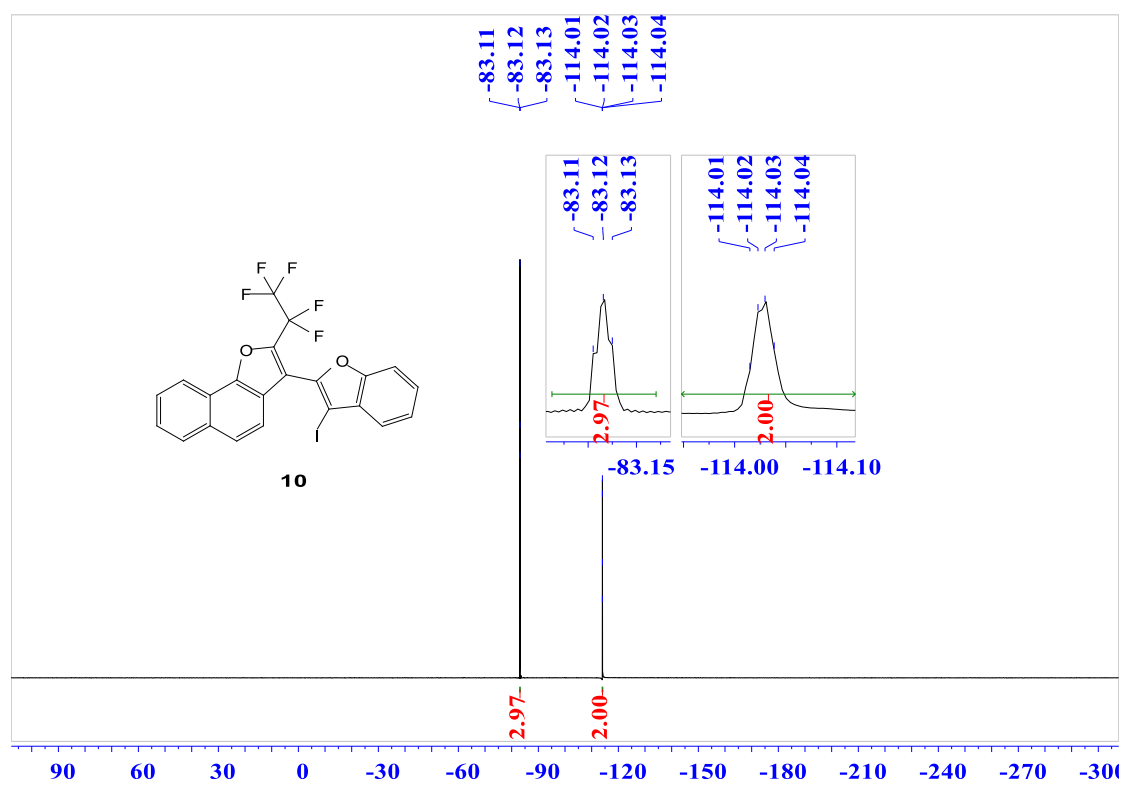

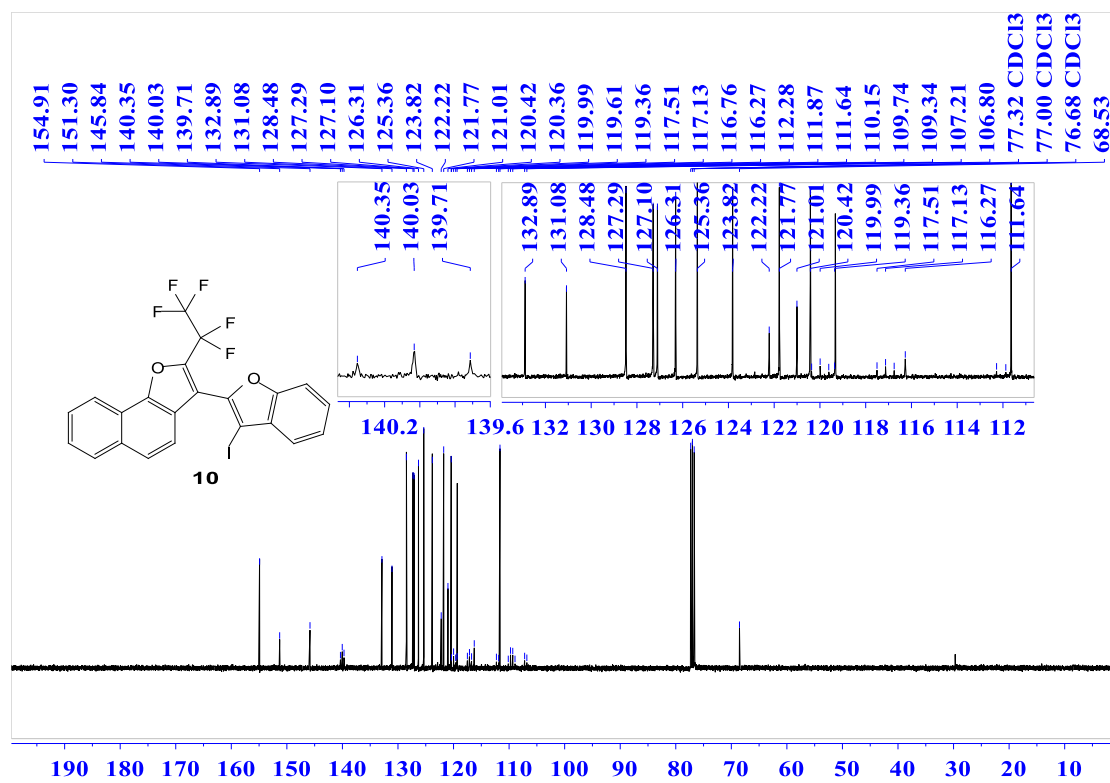

Supplement: d0qo01009j1.pdf [file d0qo01009j1.pdf]
